# Supplementary material for: Probing the potential of metalla-N-heterocyclic carbenes towards activation of enthalpically strong bonds
Source: Royal Society of Chemistry journal article supplement (doi:10.1039/d0dt01363c), 2020-01-01
Supplement: d0dt01363c1.pdf [file d0dt01363c1.pdf]

## Supporting Information

### **Probing the Potential of Metalla-*N*-heterocyclic Carbenes Towards Activation of Enthalpically Strong Bonds**

Bijoy Ghosh and Ashwini K. Phukan\*

Department of Chemical Sciences, Tezpur University, Napaam 784028, Assam, India

E-Mail: [ashwini@tezu.ernet.in](mailto:ashwini@tezu.ernet.in)

## Contents

|                 |                                                                                                                                                                                                                                                                                                                                                                                                                                                                                        |   |
|-----------------|----------------------------------------------------------------------------------------------------------------------------------------------------------------------------------------------------------------------------------------------------------------------------------------------------------------------------------------------------------------------------------------------------------------------------------------------------------------------------------------|---|
| <b>Table S1</b> | Calculated $\Delta E_{S-T}$ values (in kcal mol <sup>-1</sup> ) for the experimentally trapped MNHCs.                                                                                                                                                                                                                                                                                                                                                                                  | 7 |
| <b>Table S2</b> | Calculated important geometrical parameters and natural charges at hydridic ( $q_H^{\delta-}$ ) and positively polarized hydrogen atom ( $q_H^{\delta+}$ ) and occupancies of the formally vacant $p_\pi$ orbital at the carbene center ( $Occ_{p_\pi}$ ) of the transition states involved in the activation of hydrogen by <b>1</b> , <b>3</b> and <b>IV</b> (CAAC).                                                                                                                 | 7 |
| <b>Table S3</b> | Calculated C-X (X = C, N) bond lengths (in Å), their corresponding Wiberg bond index (WBI) values and $\angle N - C - X$ bond angles (in degree) for the H – H splitting product obtained for <b>1</b> , <b>3</b> and <b>IV</b> (CAAC).                                                                                                                                                                                                                                                | 8 |
| <b>Table S4</b> | Calculated important geometrical parameters and natural charges at the nitrogen atom of the $NH_2^{\delta-}$ fragment ( $q_{NH_2^{\delta-}}$ ) and hydrogen atom ( $q_H^{\delta+}$ ) and occupancies of the formally vacant $p_\pi$ orbital at the carbene center ( $Occ_{p_\pi}$ ) of the transition states involved in the activation of N-H bond of $NH_3$ by <b>1</b> , <b>3</b> , DAC ( <b>III</b> ) and CAAC ( <b>IV</b> ) via nucleophilic pathway.                             | 8 |
| <b>Table S5</b> | Calculated C-X (X = C, N) bond lengths (in Å), their corresponding Wiberg bond index (WBI) values and $\angle N - C - X$ bond angles (in degree) for the N – H splitting product obtained for <b>1</b> , <b>3</b> , DAC ( <b>III</b> ) and CAAC ( <b>IV</b> ).                                                                                                                                                                                                                         | 8 |
| <b>Table S6</b> | Calculated important geometrical parameters and natural charges at the nitrogen atom of $NH_3$ ( $q_{NH_3}$ ) and carbenic carbon ( $q_{Cc}$ ) and occupancies of the formally vacant $p_\pi$ orbital at the carbene center ( $Occ_{p_\pi}$ ) of the first transition state ( <b>TS</b> <sub>1<sup>N-H</sup></sub> ) and the intermediate ( <b>Int</b> <sup>N-H</sup> ) involved in the activation of N-H bond of $NH_3$ by <b>3</b> and DAC ( <b>III</b> ) via electrophilic pathway. | 9 |
| <b>Table S7</b> | Calculated important geometrical parameters and natural charges at the nitrogen atom of the $NH_2^{\delta-}$ fragment ( $q_{NH_2^{\delta-}}$ ) and hydrogen atom ( $q_H^{\delta+}$ ) and occupancies of the formally vacant $p_\pi$ orbital at the carbene center ( $Occ_{p_\pi}$ ) of the second transition state ( <b>TS</b> <sub>2<sup>N-H</sup></sub> ) involved in the activation of N-H bond of $NH_3$ by <b>3</b> and DAC ( <b>III</b> ) via electrophilic pathway.             | 9 |

|                  |                                                                                                                                                                                                                                                                                                                                                                                                                                                                                                                                  |    |
|------------------|----------------------------------------------------------------------------------------------------------------------------------------------------------------------------------------------------------------------------------------------------------------------------------------------------------------------------------------------------------------------------------------------------------------------------------------------------------------------------------------------------------------------------------|----|
| <b>Table S8</b>  | Calculated important geometrical parameters and natural charges at the phosphorus atom of the $\text{PH}_2^{\delta-}$ fragment ( $q_{\text{PH}_2^{\delta-}}$ ) and hydrogen atom ( $q_{\text{H}^{\delta+}}$ ) and occupancies of the formally vacant $p_{\pi}$ orbital at the carbene center ( $\text{Occ}_{p_{\pi}}$ ) of the transition states involved in the activation of P-H bond of $\text{PH}_3$ by <b>1</b> , <b>3</b> , DAC ( <b>III</b> ) and CAAC ( <b>IV</b> ) via nucleophilic pathway.                            | 10 |
| <b>Table S9</b>  | Calculated C-X (X = C, N) bond lengths (in Å), their corresponding Wiberg bond index (WBI) values and $\angle\text{N} - \text{C} - \text{X}$ bond angles (in degree) for the P – H splitting product obtained for <b>1</b> , <b>3</b> , DAC ( <b>III</b> ) and CAAC ( <b>IV</b> ).                                                                                                                                                                                                                                               | 10 |
| <b>Table S10</b> | Calculated important geometrical parameters and natural charges at the phosphorus atom of $\text{PH}_3$ ( $q_{\text{PH}_3}$ ) and carbenic carbon ( $q_{\text{C}_c}$ ) and occupancies of the formally vacant $p_{\pi}$ orbital at the carbene center ( $\text{Occ}_{p_{\pi}}$ ) of the first transition state ( <b>TS</b> <sub>1<sup>P-H</sup></sub> ) and the intermediate ( <b>Int</b> <sup>P-H</sup> ) involved in the activation of P-H bond of $\text{PH}_3$ by <b>3</b> and DAC ( <b>III</b> ) via electrophilic pathway. | 11 |
| <b>Table S11</b> | Calculated important geometrical parameters and natural charges at the phosphorus atom of the $\text{PH}_2^{\delta-}$ fragment ( $q_{\text{PH}_2^{\delta-}}$ ) and hydrogen atom ( $q_{\text{H}^{\delta+}}$ ) and occupancies of the formally vacant $p_{\pi}$ orbital at the carbene center ( $\text{Occ}_{p_{\pi}}$ ) for the second transition state ( <b>TS</b> <sub>2<sup>P-H</sup></sub> ) involved in the activation of P-H bond of $\text{PH}_3$ by <b>3</b> and DAC ( <b>III</b> ) via electrophilic pathway.           | 11 |
| <b>Table S12</b> | Calculated important geometrical parameters and natural charges at the silicon atom of the $\text{SiH}_2\text{Ph}$ fragment ( $q_{\text{SiH}_2\text{Ph}}$ ) and hydrogen atom ( $q_{\text{H}^{\delta+}}$ ) and occupancies of the formally vacant $p_{\pi}$ orbital at the carbene center ( $\text{Occ}_{p_{\pi}}$ ) of the transition states involved in activation of the Si-H bond of $\text{SiH}_3\text{Ph}$ by <b>1</b> , <b>3</b> , DAC ( <b>III</b> ) and CAAC ( <b>IV</b> ) via proton transfer pathway.                 | 12 |
| <b>Table S13</b> | Calculated C-X (X = C, N) bond lengths (in Å), their corresponding Wiberg bond index (WBI) values and $\angle\text{N} - \text{C} - \text{X}$ bond angles (in degree) for the Si – H splitting product obtained for <b>1</b> , <b>3</b> , DAC ( <b>III</b> ) and CAAC ( <b>IV</b> ).                                                                                                                                                                                                                                              | 12 |
| <b>Table S14</b> | Calculated geometrical parameters and natural charges at the silicon atom of $\text{SiH}_3\text{Ph}$ ( $q_{\text{SiH}_3\text{Ph}}$ ) and carbenic carbon ( $q_{\text{C}_c}$ ) of the van der Waals complexes obtained for <b>1</b> , <b>3</b> and <b>III-IV</b> (indicated by the subscript <b>V</b> ) with $\text{SiH}_3\text{Ph}$ .                                                                                                                                                                                            | 13 |

|                  |                                                                                                                                                                                                                                                                                                                                                                                                                                                                                                                                            |    |
|------------------|--------------------------------------------------------------------------------------------------------------------------------------------------------------------------------------------------------------------------------------------------------------------------------------------------------------------------------------------------------------------------------------------------------------------------------------------------------------------------------------------------------------------------------------------|----|
| <b>Table S15</b> | Calculated important geometrical parameters and natural charges at the silicon atom of the $\text{SiH}_2\text{Ph}^{\delta+}$ fragment ( $q_{\text{SiH}_2\text{Ph}^{\delta+}}$ ) and hydridic hydrogen atom ( $q_{\text{H}^{\delta-}}$ ) and occupancies of the formally vacant $p_\pi$ orbital at the carbene center ( $\text{Occ}_{p_\pi}$ ) of the transition states involved in activation of the Si-H bond of $\text{SiH}_3\text{Ph}$ by <b>1</b> , <b>3</b> , DAC ( <b>III</b> ) and CAAC ( <b>IV</b> ) via hydride transfer pathway. | 13 |
| <b>Table S16</b> | Calculated important geometrical parameters and natural charges at the carbon atom of the $\text{CH}_3^{\delta-}$ fragment ( $q_{\text{CH}_3^{\delta-}}$ ) and hydrogen atom ( $q_{\text{H}^{\delta+}}$ ) and occupancies of the formally vacant $p_\pi$ orbital at the carbene center ( $\text{Occ}_{p_\pi}$ ) of the transition states involved in activation of the C-H bond of $\text{CH}_4$ by <b>1</b> , <b>3</b> , DAC ( <b>III</b> ) and CAAC ( <b>IV</b> ).                                                                       | 14 |
| <b>Table S17</b> | Calculated C-X (X = C, N) bond lengths (in Å), their corresponding Wiberg bond index (WBI) values and $\angle\text{N} - \text{C} - \text{X}$ bond angles (in degree) for the C - H splitting product obtained for <b>1</b> , <b>3</b> , DAC ( <b>III</b> ) and CAAC ( <b>IV</b> ).                                                                                                                                                                                                                                                         | 14 |
| <b>Fig. S1</b>   | Singlet state optimized geometries of <b>I-IV</b> and <b>1-3</b> .                                                                                                                                                                                                                                                                                                                                                                                                                                                                         | 15 |
| <b>Fig. S2</b>   | Molecular orbitals showing the orientation of the nitrogen lone pair for the TSs ( <b>1TS</b> <sub>Nu</sub> <sup>N-H</sup> , <b>3TS</b> <sub>Nu</sub> <sup>N-H</sup> and <b>3TS</b> <sub>2</sub> <sup>N-H</sup> ) involved in the activation of N-H bond of $\text{NH}_3$ .                                                                                                                                                                                                                                                                | 16 |
| <b>Fig. S3</b>   | Molecular orbitals showing the orientation of the phosphorus lone pair for the TSs ( <b>1TS</b> <sub>Nu</sub> <sup>P-H</sup> , <b>3TS</b> <sub>Nu</sub> <sup>P-H</sup> and <b>3TS</b> <sub>2</sub> <sup>P-H</sup> ) involved in the activation of P-H bond of $\text{PH}_3$ .                                                                                                                                                                                                                                                              | 17 |
| <b>Fig. S4</b>   | Triplet state optimized geometries of <b>I-IV</b> and <b>1-3</b> .                                                                                                                                                                                                                                                                                                                                                                                                                                                                         | 18 |
| <b>Fig. S5</b>   | Optimized geometries of the H-H splitting product obtained for <b>1</b> , <b>3</b> and CAAC ( <b>IV</b> ).                                                                                                                                                                                                                                                                                                                                                                                                                                 | 19 |
| <b>Fig. S6</b>   | Optimized geometries of the N-H bond splitting product obtained for <b>1</b> , <b>3</b> and <b>III-IV</b> .                                                                                                                                                                                                                                                                                                                                                                                                                                | 20 |
| <b>Fig. S7</b>   | Optimized geometries of the P-H bond splitting product obtained for <b>1</b> , <b>3</b> and <b>III-IV</b> .                                                                                                                                                                                                                                                                                                                                                                                                                                | 21 |
| <b>Fig. S8</b>   | Optimized geometries of the Si-H bond splitting product obtained for <b>1</b> , <b>3</b> and <b>III-IV</b> .                                                                                                                                                                                                                                                                                                                                                                                                                               | 22 |

|                 |                                                                                                                                                                                                                                                                                                                                                                                                                                                                                                                                                                                                                                                                                                                                                                                                                                                                                                                           |    |
|-----------------|---------------------------------------------------------------------------------------------------------------------------------------------------------------------------------------------------------------------------------------------------------------------------------------------------------------------------------------------------------------------------------------------------------------------------------------------------------------------------------------------------------------------------------------------------------------------------------------------------------------------------------------------------------------------------------------------------------------------------------------------------------------------------------------------------------------------------------------------------------------------------------------------------------------------------|----|
| <b>Fig. S9</b>  | Optimized geometries of the C-H bond splitting product obtained for <b>1</b> , <b>3</b> and <b>III-IV</b> .                                                                                                                                                                                                                                                                                                                                                                                                                                                                                                                                                                                                                                                                                                                                                                                                               | 23 |
| <b>Fig. S10</b> | Optimized geometry of the transition state obtained for the activation of dihydrogen by CAAC ( <b>IV</b> ).                                                                                                                                                                                                                                                                                                                                                                                                                                                                                                                                                                                                                                                                                                                                                                                                               | 24 |
| <b>Fig. S11</b> | Optimized geometry of the transition states obtained for the activation of N – H bond of NH <sub>3</sub> by DAC ( <b>III</b> ) and CAAC ( <b>IV</b> ) via nucleophilic pathway.                                                                                                                                                                                                                                                                                                                                                                                                                                                                                                                                                                                                                                                                                                                                           | 24 |
| <b>Fig. S12</b> | Optimized geometries of the transition states and intermediate involved in the activation of N – H bond of NH <sub>3</sub> by DAC ( <b>III</b> ) via electrophilic pathway.                                                                                                                                                                                                                                                                                                                                                                                                                                                                                                                                                                                                                                                                                                                                               | 25 |
| <b>Fig. S13</b> | Optimized geometry of the transition states obtained for the activation of P – H bond of PH <sub>3</sub> by DAC ( <b>III</b> ) and CAAC ( <b>IV</b> ) via nucleophilic pathway.                                                                                                                                                                                                                                                                                                                                                                                                                                                                                                                                                                                                                                                                                                                                           | 26 |
| <b>Fig. S14</b> | Optimized geometries of the transition states and intermediate involved in the activation of P – H bond of PH <sub>3</sub> by DAC ( <b>III</b> ) via electrophilic pathway.                                                                                                                                                                                                                                                                                                                                                                                                                                                                                                                                                                                                                                                                                                                                               | 27 |
| <b>Fig. S15</b> | Optimized geometries of the transition states involved in the activation of Si – H bond of SiH <sub>3</sub> Ph by DAC ( <b>III</b> ) and CAAC ( <b>IV</b> ) via proton transfer pathway.                                                                                                                                                                                                                                                                                                                                                                                                                                                                                                                                                                                                                                                                                                                                  | 28 |
| <b>Fig. S16</b> | Optimized geometries of the van der Waals complexes and transition states involved in the activation of Si – H bond of SiH <sub>3</sub> Ph by DAC ( <b>III</b> ) and CAAC ( <b>IV</b> ) via hydride transfer pathway.                                                                                                                                                                                                                                                                                                                                                                                                                                                                                                                                                                                                                                                                                                     | 29 |
| <b>Fig. S17</b> | Optimized geometries of the transition states involved in the activation of C – H bond of CH <sub>4</sub> by DAC ( <b>III</b> ) and CAAC ( <b>IV</b> ).                                                                                                                                                                                                                                                                                                                                                                                                                                                                                                                                                                                                                                                                                                                                                                   | 30 |
|                 | <ul style="list-style-type: none"> <li>• Cartesian coordinates of <b>1-3</b> and <b>I-IV</b> in their optimized singlet and triplet state. 30-43</li> <li>• Cartesian coordinates of H<sub>2</sub>, NH<sub>3</sub>, PH<sub>3</sub>, SiH<sub>3</sub>Ph and CH<sub>4</sub>. 44-45</li> <li>• Cartesian coordinates of the transition states involved in the activation of hydrogen by <b>1</b>, <b>3</b> and <b>IV</b>. 45-48</li> <li>• Cartesian coordinates of the transition states and the intermediates involved in the activation of N – H bond of NH<sub>3</sub> by <b>1</b>, <b>3</b> and <b>III-IV</b>. 48-59</li> <li>• Cartesian coordinates of the transition states and the intermediates involved in the activation of P – H bond of PH<sub>3</sub> by <b>1</b>, <b>3</b> and <b>III-IV</b>. 59-70</li> <li>• Cartesian coordinates of the transition states and the intermediates involved 70-86</li> </ul> |    |

in the activation of Si –H bond of SiH<sub>3</sub>Ph by **1**, **3** and **III-IV**.

- Cartesian coordinates of the transition states involved in the activation of C – H bond of CH<sub>4</sub> by **1**, **3** and **III-IV**. 87-91
- Cartesian coordinates of the optimized geometries of the dihydrogen splitting product obtained for **1**, **3** and **IV**. 91-94
- Cartesian coordinates of the optimized geometries of the N-H bond splitting product obtained for **1**, **3** and **III-IV**. 94-99
- Cartesian coordinates of the optimized geometries for the P – H bond splitting product obtained for **1**, **3** and **III-IV**. 99-103
- Cartesian coordinates of the optimized geometries for the Si – H bond splitting product obtained for **1**, **3** and **III-IV**. 103-109
- Cartesian coordinates of the optimized geometries for the C – H bond splitting product obtained for **1**, **3** and **III-IV**. 109-113

**Table S1** Calculated  $\Delta E_{S-T}$  values (in kcal mol<sup>-1</sup>) for the experimentally trapped MNHCs (bipy = bipyridine).

| Sl. No. | Molecules                                                                         | $\Delta E_{S-T}$ |
|---------|-----------------------------------------------------------------------------------|------------------|
| 1       | 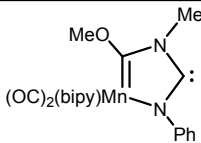 | 27.2             |
| 2       |  | 24.6             |
| 3       |  | 24.2             |

**Table S2** Calculated important geometrical parameters and natural charges at hydridic ( $q_H^{\delta-}$ ) and positively polarized hydrogen atom ( $q_H^{\delta+}$ ) and occupancies of the formally vacant  $p_\pi$  orbital at the carbene center ( $Occ_{p_\pi}$ ) of the transition states involved in the activation of hydrogen by **1**, **3** and **IV** (CAAC). Bond lengths, bond angles ( $\angle N-C_c-X$ ,  $X = C, N$ ) are given in Å and in degree (°) respectively and Wiberg Bond Index (WBI) values are given within parentheses.

| Molecules                 | $H^{\delta+} - H^{\delta-}$ | $C_c - H^{\delta-}$ | $C_c - H^{\delta+}$ | $C_c-X$                        | $\angle N-C_c-X$ | $q_H^{\delta-}$ | $q_H^{\delta+}$ | $Occ_{p_\pi}$ |
|---------------------------|-----------------------------|---------------------|---------------------|--------------------------------|------------------|-----------------|-----------------|---------------|
| <b>IVTS<sup>H-H</sup></b> | 1.076<br>(0.314)            | 1.950<br>(0.465)    | 1.214<br>(0.621)    | 1.325/1.502<br>(1.298)/(0.997) | 108.0            | -0.196          | 0.185           | 0.756         |
| <b>1TS<sup>H-H</sup></b>  | 1.249<br>(0.266)            | 2.217<br>(0.312)    | 1.186<br>(0.651)    | 1.297/1.403<br>(1.497)/(1.004) | 114.0            | -0.423          | 0.206           | 0.815         |
| <b>3TS<sup>H-H</sup></b>  | 1.091<br>(0.320)            | 2.009<br>(0.413)    | 1.201<br>(0.615)    | 1.353/1.353<br>(1.155)/(1.154) | 124.1            | -0.197          | 0.179           | 0.770         |

**Table S3** Calculated C-X (X = C, N) bond lengths (in Å), their corresponding Wiberg bond index (WBI) values and  $\angle N - C - X$  bond angles (in degree) for the H – H splitting product obtained for **1**, **3** and **IV** (CAAC).

| Molecules                | C-X         | WBI         | $\angle N-C-X$ |
|--------------------------|-------------|-------------|----------------|
| <b>IVP<sup>H-H</sup></b> | 1.518/1.448 | 0.979/0.981 | 104.8          |
| <b>1P<sup>H-H</sup></b>  | 1.464/1.412 | 0.913/1.052 | 108.6          |
| <b>3P<sup>H-H</sup></b>  | 1.445/1.444 | 0.954/0.958 | 114.4          |

**Table S4** Calculated important geometrical parameters and natural charges at the nitrogen atom of the  $NH_2^{\delta-}$  fragment ( $q_{NH_2^{\delta-}}$ ) and hydrogen atom ( $q_H^{\delta+}$ ) and occupancies of the formally vacant  $p_\pi$  orbital at the carbene center ( $Occ_{p_\pi}$ ) of the transition states involved in the activation of N-H bond of  $NH_3$  by **1**, **3**, DAC (**III**) and CAAC (**IV**) via nucleophilic pathway. Bond lengths, bond angles ( $\angle N-C_c-X$ , X = C, N) are given in Å and in degree ( $^\circ$ ) respectively and Wiberg Bond Index (WBI) values are given within parentheses.

| Molecules                               | $H_2N^{\delta-} - H^{\delta+}$ | $C_c - NH_2^{\delta-}$ | $C_c - H^{\delta+}$ | $C_c-X$                        | $\angle N-C_c-X$ | $q_{NH_2^{\delta-}}$ | $q_H^{\delta+}$ | $Occ_{p_\pi}$ |
|-----------------------------------------|--------------------------------|------------------------|---------------------|--------------------------------|------------------|----------------------|-----------------|---------------|
| <b>IIITS<sub>Nu</sub><sup>N-H</sup></b> | 1.513<br>(0.185)               | 2.332<br>(0.436)       | 1.149<br>(0.681)    | 1.354/1.354<br>(1.160)/(1.160) | 119.9            | -1.080               | 0.333           | 0.745         |
| <b>IVTS<sub>Nu</sub><sup>N-H</sup></b>  | 1.542<br>(0.177)               | 2.428<br>(0.401)       | 1.156<br>(0.695)    | 1.314/1.496<br>(1.378)/(0.995) | 109.5            | -1.165               | 0.324           | 0.792         |
| <b>1TS<sub>Nu</sub><sup>N-H</sup></b>   | 1.688<br>(0.117)               | 2.486<br>(0.296)       | 1.125<br>(0.743)    | 1.294/1.397<br>(1.494)/(1.013) | 115.0            | -1.210               | 0.320           | 0.810         |
| <b>3TS<sub>Nu</sub><sup>N-H</sup></b>   | 1.539<br>(0.176)               | 2.384<br>(0.410)       | 1.144<br>(0.689)    | 1.351/1.351<br>(1.176)/(1.176) | 124.9            | -1.110               | 0.329           | 0.749         |

**Table S5** Calculated C-X (X = C, N) bond lengths (in Å), their corresponding Wiberg bond index (WBI) values and  $\angle N - C - X$  bond angles (in degree) for the N – H splitting product obtained for **1**, **3**, DAC (**III**) and CAAC (**IV**).

| Molecules                 | C-X         | WBI         | $\angle N-C-X$ |
|---------------------------|-------------|-------------|----------------|
| <b>IIIP<sup>N-H</sup></b> | 1.461/1.445 | 0.922/0.947 | 110.8          |
| <b>IVP<sup>N-H</sup></b>  | 1.450/1.538 | 0.968/0.943 | 102.6          |
| <b>1P<sup>N-H</sup></b>   | 1.416/1.508 | 1.046/0.840 | 105.6          |
| <b>3P<sup>N-H</sup></b>   | 1.464/1.447 | 0.919/0.947 | 114.2          |



**Table S6** Calculated important geometrical parameters and natural charges at the nitrogen atom of NH<sub>3</sub> ( $q_{\text{NH}_3}$ ) and carbenic carbon ( $q_{\text{C}_c}$ ) and occupancies of the formally vacant  $p_\pi$  orbital at the carbene center ( $\text{Occ}_{p_\pi}$ ) of the first transition state (**TS**<sub>1<sup>N-H</sup>) and the intermediate (**Int**<sup>N-H</sup>) involved in the activation of N-H bond of NH<sub>3</sub> by **3** and DAC (**III**) via electrophilic pathway. Bond lengths, bond angles ( $\angle\text{N-C}_c\text{-N}$ ) are given in Å and in degree (°) respectively and Wiberg Bond Index (WBI) values are given within parentheses.</sub>

| Molecules                                | H <sub>3</sub> N – C <sub>c</sub> | C <sub>c</sub> -N               | $\angle\text{N-C}_c\text{-N}$ | $q_{\text{NH}_3}$ | $q_{\text{C}_c}$ | $\text{Occ}_{p_\pi}$ |
|------------------------------------------|-----------------------------------|---------------------------------|-------------------------------|-------------------|------------------|----------------------|
| <b>III-TS</b> <sub>1<sup>N-H</sup></sub> | 1.822<br>(0.547)                  | 1.407/ 1.407<br>(1.020)/(1.020) | 113.3                         | -0.826            | 0.185            | 0.588                |
| <b>III-Int</b> <sup>N-H</sup>            | 1.597<br>(0.756)                  | 1.425/1.425<br>(0.978)/(0.978)  | 113.3                         | -0.737            | 0.097            | 0.677                |
| <b>3TS</b> <sub>1<sup>N-H</sup></sub>    | 1.856<br>(0.515)                  | 1.398/ 1.398<br>(1.041)/(1.042) | 118.9                         | -0.843            | 0.199            | 0.574                |
| <b>3Int</b> <sup>N-H</sup>               | 1.570<br>(0.783)                  | 1.417/ 1.417<br>(0.986)/(0.986) | 119.1                         | -0.726            | 0.089            | 0.696                |

**Table S7** Calculated important geometrical parameters and natural charges at the nitrogen atom of the NH<sub>2</sub><sup>δ-</sup> fragment ( $q_{\text{NH}_2^{\delta-}}$ ) and hydrogen atom ( $q_{\text{H}^{\delta+}}$ ) and occupancies of the formally vacant  $p_\pi$  orbital at the carbene center ( $\text{Occ}_{p_\pi}$ ) of the second transition state (**TS**<sub>2<sup>N-H</sup>) involved in the activation of N-H bond of NH<sub>3</sub> by **3** and DAC (**III**) via electrophilic pathway. Bond lengths, bond angles ( $\angle\text{N-C}_c\text{-N}$ ) are given in Å and in degree (°) respectively and Wiberg Bond Index (WBI) values are given within parentheses.</sub>

| Molecules                                | H <sub>2</sub> N <sup>δ-</sup> – H <sup>δ+</sup> | C <sub>c</sub> – NH <sub>2</sub> <sup>δ-</sup> | C <sub>c</sub> – H <sup>δ+</sup> | C <sub>c</sub> -N              | $\angle\text{N-C}_c\text{-N}$ | $q_{\text{NH}_2^{\delta-}}$ | $q_{\text{H}^{\delta+}}$ | $\text{Occ}_{p_\pi}$ |
|------------------------------------------|--------------------------------------------------|------------------------------------------------|----------------------------------|--------------------------------|-------------------------------|-----------------------------|--------------------------|----------------------|
| <b>III-TS</b> <sub>2<sup>N-H</sup></sub> | 1.515<br>(0.224)                                 | 2.295<br>(0.377)                               | 1.168<br>(0.652)                 | 1.350/1.350<br>(1.171)/(1.171) | 119.8                         | -1.119                      | 0.316                    | 0.710                |
| <b>3TS</b> <sub>2<sup>N-H</sup></sub>    | 1.531<br>(0.218)                                 | 2.347<br>(0.348)                               | 1.164<br>(0.657)                 | 1.346/1.346<br>(1.192)/(1.192) | 124.7                         | -1.144                      | 0.313                    | 0.709                |

**Table S8** Calculated important geometrical parameters and natural charges at the phosphorus atom of the  $\text{PH}_2^{\delta-}$  fragment ( $q_{\text{PH}_2^{\delta-}}$ ) and hydrogen atom ( $q_{\text{H}^{\delta+}}$ ) and occupancies of the formally vacant  $p_\pi$  orbital at the carbene center ( $\text{Occ}_{p_\pi}$ ) of the transition states involved in the activation of P-H bond of  $\text{PH}_3$  by **1**, **3**, DAC (**III**) and CAAC (**IV**) via nucleophilic pathway. Bond lengths, bond angles ( $\angle\text{N-C}_c\text{-X}$ ,  $\text{X} = \text{C}, \text{N}$ ) are given in Å and in degree ( $^\circ$ ) respectively and Wiberg Bond Index (WBI) values are given within parentheses.

| Molecules                               | $\text{H}_2\text{P}^{\delta-} - \text{H}^{\delta+}$ | $\text{C}_c - \text{PH}_2^{\delta-}$ | $\text{C}_c - \text{H}^{\delta+}$ | $\text{C}_c\text{-X}$          | $\angle\text{N-C}_c\text{-X}$ | $q_{\text{PH}_2^{\delta-}}$ | $q_{\text{H}^{\delta+}}$ | $\text{Occ}_{p_\pi}$ |
|-----------------------------------------|-----------------------------------------------------|--------------------------------------|-----------------------------------|--------------------------------|-------------------------------|-----------------------------|--------------------------|----------------------|
| <b>IIITS<sub>Nu</sub><sup>P-H</sup></b> | 1.708<br>(0.470)                                    | 2.931<br>(0.358)                     | 1.338<br>(0.487)                  | 1.354/1.356<br>(1.169)/(1.169) | 118.4                         | -0.089                      | 0.119                    | 0.734                |
| <b>IVTS<sub>Nu</sub><sup>P-H</sup></b>  | 1.733<br>(0.480)                                    | 3.030<br>(0.331)                     | 1.376<br>(0.480)                  | 1.310/1.507<br>(1.428)/(0.992) | 108.5                         | -0.234                      | 0.132                    | 0.828                |
| <b>1TS<sub>Nu</sub><sup>P-H</sup></b>   | 1.749<br>(0.461)                                    | 2.984<br>(0.282)                     | 1.347<br>(0.489)                  | 1.295/1.410<br>(1.519)/(0.992) | 112.5                         | -0.232                      | 0.135                    | 0.801                |
| <b>3TS<sub>Nu</sub><sup>P-H</sup></b>   | 1.697<br>(0.501)                                    | 2.984<br>(0.326)                     | 1.367<br>(0.456)                  | 1.349/1.348<br>(1.195)/(1.196) | 123.4                         | -0.132                      | 0.115                    | 0.707                |

**Table S9** Calculated C-X ( $\text{X} = \text{C}, \text{N}$ ) bond lengths (in Å), their corresponding Wiberg bond index (WBI) values and  $\angle\text{N} - \text{C} - \text{X}$  bond angles (in degree) for the P – H splitting product obtained for **1**, **3**, DAC (**III**) and CAAC (**IV**).

| Molecules                | C-X         | WBI         | $\angle\text{N-C-X}$ |
|--------------------------|-------------|-------------|----------------------|
| <b>III<sup>P-H</sup></b> | 1.443/1.446 | 0.958/0.956 | 111.8                |
| <b>IV<sup>P-H</sup></b>  | 1.450/1.536 | 0.972/0.966 | 102.9                |
| <b>1<sup>P-H</sup></b>   | 1.415/1.469 | 1.056/0.913 | 108.4                |
| <b>3<sup>P-H</sup></b>   | 1.444/1.451 | 0.957/0.950 | 115.6                |

**Table S10** Calculated important geometrical parameters and natural charges at the phosphorus atom of PH<sub>3</sub> ( $q_{\text{PH}_3}$ ) and carbenic carbon ( $q_{\text{C}_c}$ ) and occupancies of the formally vacant  $p_\pi$  orbital at the carbene center ( $\text{Occ}_{p_\pi}$ ) of the first transition state (**TS**<sub>1<sup>P-H</sup>) and the intermediate (**Int**<sup>P-H</sup>) involved in the activation of P-H bond of PH<sub>3</sub> by **3** and DAC (**III**) via electrophilic pathway. Bond lengths, bond angles ( $\angle\text{N-C}_c\text{-N}$ ) are given in Å and in degree (°) respectively and Wiberg Bond Index (WBI) values are given within parentheses.</sub>

| Molecules                                | H <sub>3</sub> P – C <sub>c</sub> | C <sub>c</sub> -N              | $\angle\text{N-C}_c\text{-N}$ | $q_{\text{PH}_3}$ | $q_{\text{C}_c}$ | $\text{Occ}_{p_\pi}$ |
|------------------------------------------|-----------------------------------|--------------------------------|-------------------------------|-------------------|------------------|----------------------|
| <b>III-TS</b> <sub>1<sup>P-H</sup></sub> | 1.922<br>(0.930)                  | 1.393/1.393<br>(1.045)/(1.045) | 114.9                         | 0.476             | -0.009           | 0.864                |
| <b>III-Int</b> <sup>P-H</sup>            | 1.739<br>(1.156)                  | 1.415/1.415<br>(0.988)/(0.988) | 115.7                         | 0.755             | -0.244           | 1.020                |
| <b>3TS</b> <sub>1<sup>P-H</sup></sub>    | 2.021<br>(0.798)                  | 1.380/1.380<br>(1.080)/(1.080) | 119.5                         | 0.370             | 0.083            | 0.782                |
| <b>3Int</b> <sup>P-H</sup>               | 1.685<br>(1.171)                  | 1.419/1.413<br>(0.964)/(0.975) | 119.2                         | 0.891             | -0.308           | 1.049                |

**Table S11** Calculated important geometrical parameters and natural charges at the phosphorus atom of the PH<sub>2</sub><sup>δ-</sup> fragment ( $q_{\text{PH}_2^{\delta-}}$ ) and hydrogen atom ( $q_{\text{H}^{\delta+}}$ ) and occupancies of the formally vacant  $p_\pi$  orbital at the carbene center ( $\text{Occ}_{p_\pi}$ ) for the second transition state (**TS**<sub>2<sup>P-H</sup>) involved in the activation of P-H bond of PH<sub>3</sub> by **3** and DAC (**III**) via electrophilic pathway. Bond lengths, bond angles ( $\angle\text{N-C}_c\text{-N}$ ) are given in Å and in degree (°) respectively and Wiberg Bond Index (WBI) values are given within parentheses.</sub>

| Molecules                                | H <sub>2</sub> P <sup>δ-</sup> – H <sup>δ+</sup> | C <sub>c</sub> – PH <sub>2</sub> <sup>δ-</sup> | C <sub>c</sub> – H <sup>δ+</sup> | C <sub>c</sub> -N              | $\angle\text{N-C}_c\text{-N}$ | $q_{\text{PH}_2^{\delta-}}$ | $q_{\text{H}^{\delta+}}$ | $\text{Occ}_{p_\pi}$ |
|------------------------------------------|--------------------------------------------------|------------------------------------------------|----------------------------------|--------------------------------|-------------------------------|-----------------------------|--------------------------|----------------------|
| <b>III-TS</b> <sub>2<sup>P-H</sup></sub> | 1.709<br>(0.461)                                 | 2.934<br>(0.335)                               | 1.332<br>(0.496)                 | 1.355/1.355<br>(1.170)/(1.170) | 118.3                         | -0.141                      | 0.120                    | 0.738                |
| <b>3TS</b> <sub>2<sup>P-H</sup></sub>    | 1.701<br>(0.489)                                 | 2.994<br>(0.307)                               | 1.359<br>(0.468)                 | 1.348/1.348<br>(1.197)/(1.197) | 123.4                         | -0.173                      | 0.115                    | 0.710                |

**Table S12** Calculated important geometrical parameters and natural charges at the silicon atom of the SiH<sub>2</sub>Ph fragment ( $q_{\text{SiH}_2\text{Ph}}$ ) and hydrogen atom ( $q_{\text{H}^{\delta+}}$ ) and occupancies of the formally vacant  $p_{\pi}$  orbital at the carbene center ( $\text{Occ}_{p_{\pi}}$ ) of the transition states involved in activation of the Si-H bond of SiH<sub>3</sub>Ph by **1**, **3**, DAC (**III**) and CAAC (**IV**) via proton transfer pathway. Bond lengths, bond angles ( $\angle\text{N-C}_c\text{-X}$ , X = C, N) are given in Å and in degree (°) respectively and Wiberg Bond Index (WBI) values are given within parentheses.

| Molecules                                | PhH <sub>2</sub> Si <sup>δ+</sup> – H <sup>δ-</sup> | C <sub>c</sub> – SiH <sub>2</sub> Ph | C <sub>c</sub> – H <sup>δ+</sup> | C <sub>c</sub> – X             | $\angle\text{N-C}_c\text{-X}$ | $q_{\text{SiH}_2\text{Ph}}$ | $q_{\text{H}^{\delta+}}$ | Occ <sub><math>p_{\pi}</math></sub> |
|------------------------------------------|-----------------------------------------------------|--------------------------------------|----------------------------------|--------------------------------|-------------------------------|-----------------------------|--------------------------|-------------------------------------|
| <b>IIITS<sub>PT</sub><sup>Si-H</sup></b> | 1.817<br>(0.356)                                    | 2.922<br>(0.339)                     | 1.261<br>(0.583)                 | 1.369/1.369<br>(1.117)/(1.115) | 118.0                         | 0.837                       | 0.068                    | 0.995                               |
| <b>IVTS<sub>PT</sub><sup>Si-H</sup></b>  | 1.861<br>(0.370)                                    | 2.983<br>(0.365)                     | 1.281<br>(0.575)                 | 1.325/1.506<br>(1.323)/(0.995) | 107.7                         | 0.706                       | 0.095                    | 0.825                               |
| <b>1TS<sub>PT</sub><sup>Si-H</sup></b>   | 1.889<br>(0.383)                                    | 3.016<br>(0.276)                     | 1.280<br>(0.551)                 | 1.301/1.411<br>(1.461)/(1.272) | 113.2                         | 0.659                       | 0.096                    | 0.951                               |
| <b>3TS<sub>PT</sub><sup>Si-H</sup></b>   | 1.819<br>(0.379)                                    | 2.998<br>(0.323)                     | 1.274<br>(0.561)                 | 1.359/1.361<br>(1.148)/(1.141) | 123.2                         | 0.793                       | 0.062                    | 0.895                               |

**Table S13** Calculated C-X (X = C, N) bond lengths (in Å), their corresponding Wiberg bond index (WBI) values and  $\angle\text{N} - \text{C} - \text{X}$  bond angles (in degree) for the Si – H splitting product obtained for **1**, **3**, DAC (**III**) and CAAC (**IV**).

| Molecules                  | C-X         | WBI         | $\angle\text{N-C-X}$ |
|----------------------------|-------------|-------------|----------------------|
| <b>IIIP<sup>Si-H</sup></b> | 1.454/1.455 | 0.957/0.953 | 111.9                |
| <b>IVP<sup>Si-H</sup></b>  | 1.455/1.539 | 0.979/0.970 | 102.3                |
| <b>1P<sup>Si-H</sup></b>   | 1.470/1.432 | 0.917/1.038 | 108.3                |
| <b>3P<sup>Si-H</sup></b>   | 1.455/1.459 | 0.952/0.946 | 115.5                |

**Table S14** Calculated geometrical parameters and natural charges at the silicon atom of SiH<sub>3</sub>Ph ( $q_{\text{SiH}_3\text{Ph}}$ ) and carbenic carbon ( $q_{\text{C}_c}$ ) of the van der Waals complexes obtained for **1**, **3** and **III-IV** (indicated by the subscript **V**) with SiH<sub>3</sub>Ph. Bond lengths, bond angles ( $\angle\text{N-C}_c\text{-X}$ , X = C, N) are given in Å and in degree (°) respectively and Wiberg Bond Index (WBI) values are given within parentheses.

| Molecules              | C <sub>c</sub> – SiH <sub>3</sub> Ph | C <sub>c</sub> -X              | $\angle\text{N-C}_c\text{-X}$ | $q_{\text{SiH}_3\text{Ph}}$ | $q_{\text{C}_c}$ |
|------------------------|--------------------------------------|--------------------------------|-------------------------------|-----------------------------|------------------|
| <b>III<sub>V</sub></b> | 3.176<br>(0.038)                     | 1.350/1.352<br>(1.214)/(1.208) | 116.5                         | 0.947                       | 0.291            |
| <b>IV<sub>V</sub></b>  | 2.983<br>(0.079)                     | 1.303/1.507<br>(1.488)/(0.985) | 106.8                         | 0.962                       | 0.208            |
| <b>1<sub>V</sub></b>   | 3.146<br>(0.046)                     | 1.290/1.425<br>(1.602)/(0.963) | 109.7                         | 0.947                       | 0.227            |
| <b>3<sub>V</sub></b>   | 3.244<br>(0.036)                     | 1.348/1.357<br>(1.233)/(1.228) | 120.5                         | 0.951                       | 0.289            |

**Table S15** Calculated important geometrical parameters and natural charges at the silicon atom of the SiH<sub>2</sub>Ph<sup>δ+</sup> fragment ( $q_{\text{SiH}_2\text{Ph}^{\delta+}}$ ) and hydridic hydrogen atom ( $q_{\text{H}^{\delta-}}$ ) and occupancies of the formally vacant p<sub>π</sub> orbital at the carbene center ( $\text{Occ}_{\text{p}_\pi}$ ) of the transition states involved in activation of the Si-H bond of SiH<sub>3</sub>Ph by **1**, **3**, DAC (**III**) and CAAC (**IV**) via hydride transfer pathway. Bond lengths, bond angles ( $\angle\text{N-C}_c\text{-X}$ , X = C, N) are given in Å and in degree (°) respectively and Wiberg Bond Index (WBI) values are given within parentheses.

| Molecules                                | PhH <sub>2</sub> Si <sup>δ+</sup> – H <sup>δ-</sup> | C <sub>c</sub> – SiH <sub>2</sub> Ph <sup>δ+</sup> | C <sub>c</sub> – H <sup>δ-</sup> | C <sub>c</sub> -X              | $\angle\text{N-C}_c\text{-X}$ | $q_{\text{SiH}_2\text{Ph}^{\delta+}}$ | $q_{\text{H}^{\delta-}}$ | $\text{Occ}_{\text{p}_\pi}$ |
|------------------------------------------|-----------------------------------------------------|----------------------------------------------------|----------------------------------|--------------------------------|-------------------------------|---------------------------------------|--------------------------|-----------------------------|
| <b>IIITS<sub>hy</sub><sup>Si-H</sup></b> | 1.609<br>(0.514)                                    | 2.045<br>(0.551)                                   | 1.787<br>(0.322)                 | 1.371/1.373<br>(1.121)/(1.113) | 116.0                         | 0.997                                 | -0.091                   | 0.735                       |
| <b>IVTS<sub>hy</sub><sup>Si-H</sup></b>  | 1.619<br>(0.534)                                    | 1.956<br>(0.645)                                   | 1.909<br>(0.282)                 | 1.319/1.518<br>(1.327)/(0.983) | 108.6                         | 0.978                                 | -0.150                   | 0.737                       |
| <b>1TS<sub>hy</sub><sup>Si-H</sup></b>   | 1.775<br>(0.380)                                    | 1.908<br>(0.713)                                   | 1.863<br>(0.292)                 | 1.307/1.421<br>(1.432)/(0.969) | 111.6                         | 1.014                                 | -0.224                   | 0.856                       |
| <b>3TS<sub>hy</sub><sup>Si-H</sup></b>   | 1.577<br>(0.550)                                    | 2.093<br>(0.499)                                   | 1.781<br>(0.307)                 | 1.372/1.368<br>(1.112)/(1.122) | 119.7                         | 1.000                                 | -0.090                   | 0.714                       |

**Table S16** Calculated important geometrical parameters and natural charges at the carbon atom of the  $\text{CH}_3^{\delta-}$  fragment ( $q_{\text{CH}_3^{\delta-}}$ ) and hydrogen atom ( $q_{\text{H}^{\delta+}}$ ) and occupancies of the formally vacant  $p_\pi$  orbital at the carbene center ( $\text{Occ}_{p_\pi}$ ) of the transition states involved in activation of the C-H bond of  $\text{CH}_4$  by **1**, **3**, DAC (**III**) and CAAC (**IV**). Bond lengths, bond angles ( $\angle\text{N-C}_c\text{-X}$ ,  $\text{X} = \text{C}, \text{N}$ ) are given in Å and in degree ( $^\circ$ ) respectively and Wiberg Bond Index (WBI) values are given within parentheses.

| Molecules                  | $\text{H}_3\text{C}^{\delta-} - \text{H}^{\delta+}$ | $\text{C}_c - \text{CH}_3^{\delta-}$ | $\text{C}_c - \text{H}^{\delta+}$ | $\text{C}_c\text{-X}$          | $\angle\text{N-C}_c\text{-X}$ | $q_{\text{H}_3\text{C}^{\delta-}}$ | $q_{\text{H}^{\delta+}}$ | $\text{Occ}_{p_\pi}$ |
|----------------------------|-----------------------------------------------------|--------------------------------------|-----------------------------------|--------------------------------|-------------------------------|------------------------------------|--------------------------|----------------------|
| <b>IIITS<sup>C-H</sup></b> | 1.557<br>(0.222)                                    | 2.342<br>(0.496)                     | 1.155<br>(0.675)                  | 1.368/1.368<br>(1.107)/(1.107) | 119.0                         | -0.778                             | 0.279                    | 0.807                |
| <b>IVTS<sup>C-H</sup></b>  | 1.557<br>(0.224)                                    | 2.343<br>(0.518)                     | 1.167<br>(0.674)                  | 1.338/1.502<br>(1.247)/(0.995) | 108.0                         | -0.827                             | 0.277                    | 0.832                |
| <b>1TSC<sup>C-H</sup></b>  | 1.772<br>(0.143)                                    | 2.483<br>(0.370)                     | 1.131<br>(0.736)                  | 1.305/1.400<br>(1.411)/(1.002) | 114.6                         | -0.916                             | 0.286                    | 0.878                |
| <b>3TSC<sup>C-H</sup></b>  | 1.536<br>(0.244)                                    | 2.366<br>(0.471)                     | 1.166<br>(0.653)                  | 1.364/1.364<br>(1.119)/(1.119) | 124.3                         | -0.786                             | 0.271                    | 0.788                |

**Table S17** Calculated C-X ( $\text{X} = \text{C}, \text{N}$ ) bond lengths (in Å), their corresponding Wiberg bond index (WBI) values and  $\angle\text{N} - \text{C} - \text{X}$  bond angles (in degree) for the C – H splitting product obtained for **1**, **3**, DAC (**III**) and CAAC (**IV**).

| Molecules                 | C-X         | WBI         | $\angle\text{N-C-X}$ |
|---------------------------|-------------|-------------|----------------------|
| <b>IIIP<sup>C-H</sup></b> | 1.453/1.452 | 0.946/0.946 | 111.4                |
| <b>IVP<sup>C-H</sup></b>  | 1.462/1.533 | 0.958/0.961 | 103.0                |
| <b>1PC<sup>C-H</sup></b>  | 1.479/1.428 | 0.898/1.034 | 106.8                |
| <b>3PC<sup>C-H</sup></b>  | 1.456/1.455 | 0.942/0.943 | 115.2                |

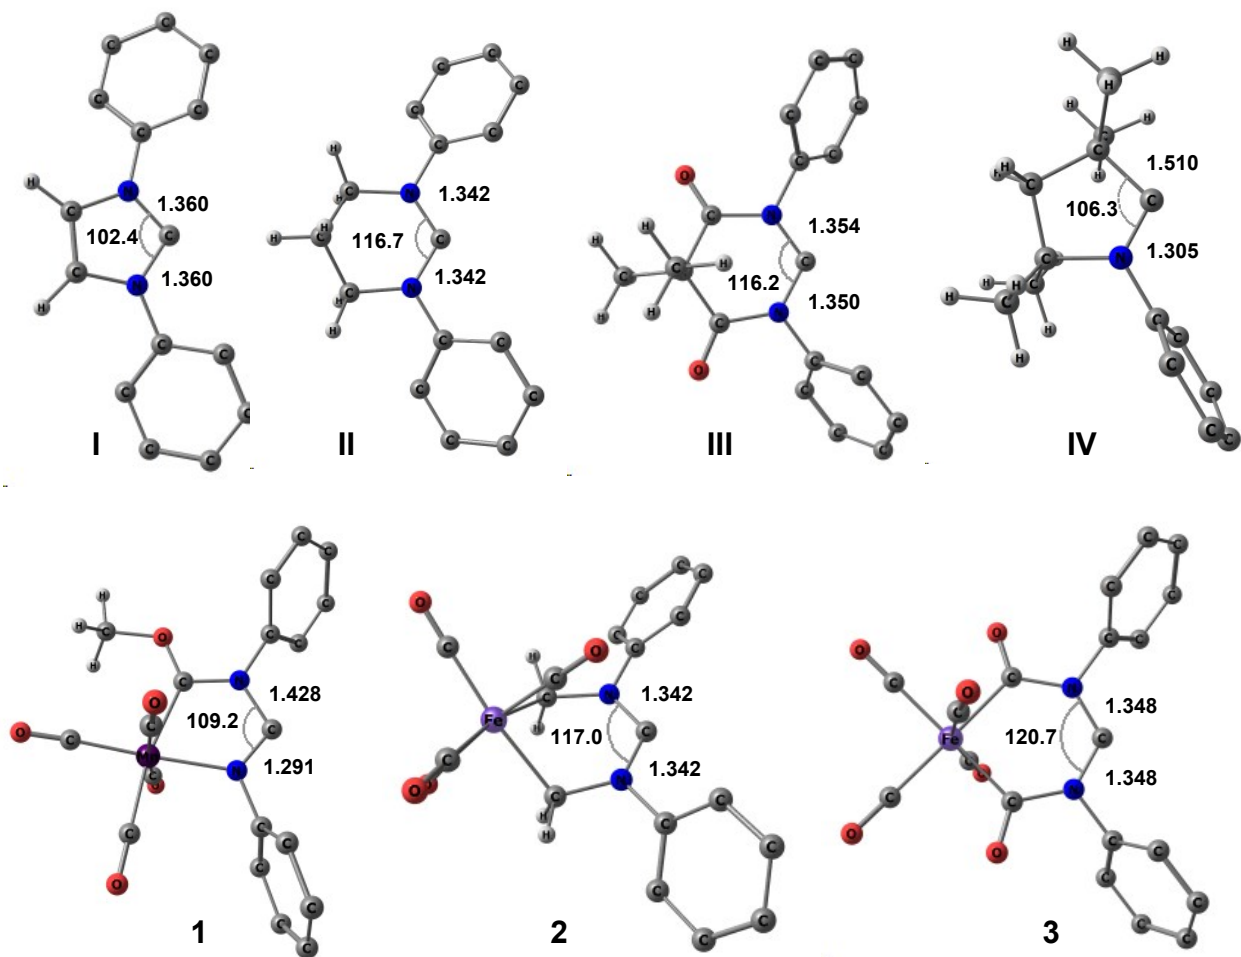

**Fig. S1** Singlet state optimized geometries of I-IV and 1-3. The hydrogen atoms of the phenyl rings are omitted for clarity.

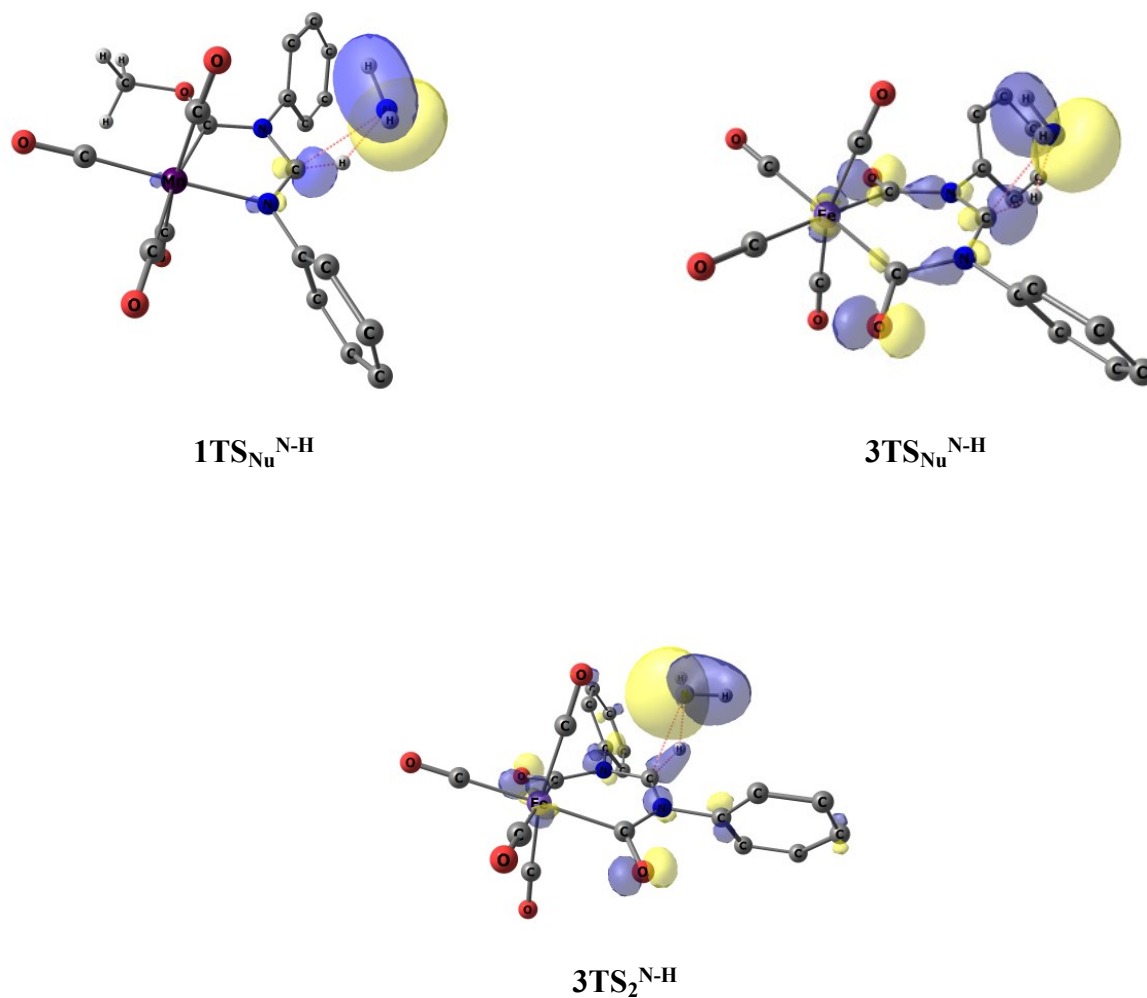

**Fig. S2** Molecular orbitals showing the orientation of the nitrogen lone pair for the TSs ( $1\text{TS}_{\text{Nu}}^{\text{N-H}}$ ,  $3\text{TS}_{\text{Nu}}^{\text{N-H}}$  and  $3\text{TS}_2^{\text{N-H}}$ ) involved in the activation of N-H bond of NH<sub>3</sub>. The hydrogen atoms of the phenyl rings are omitted for clarity.



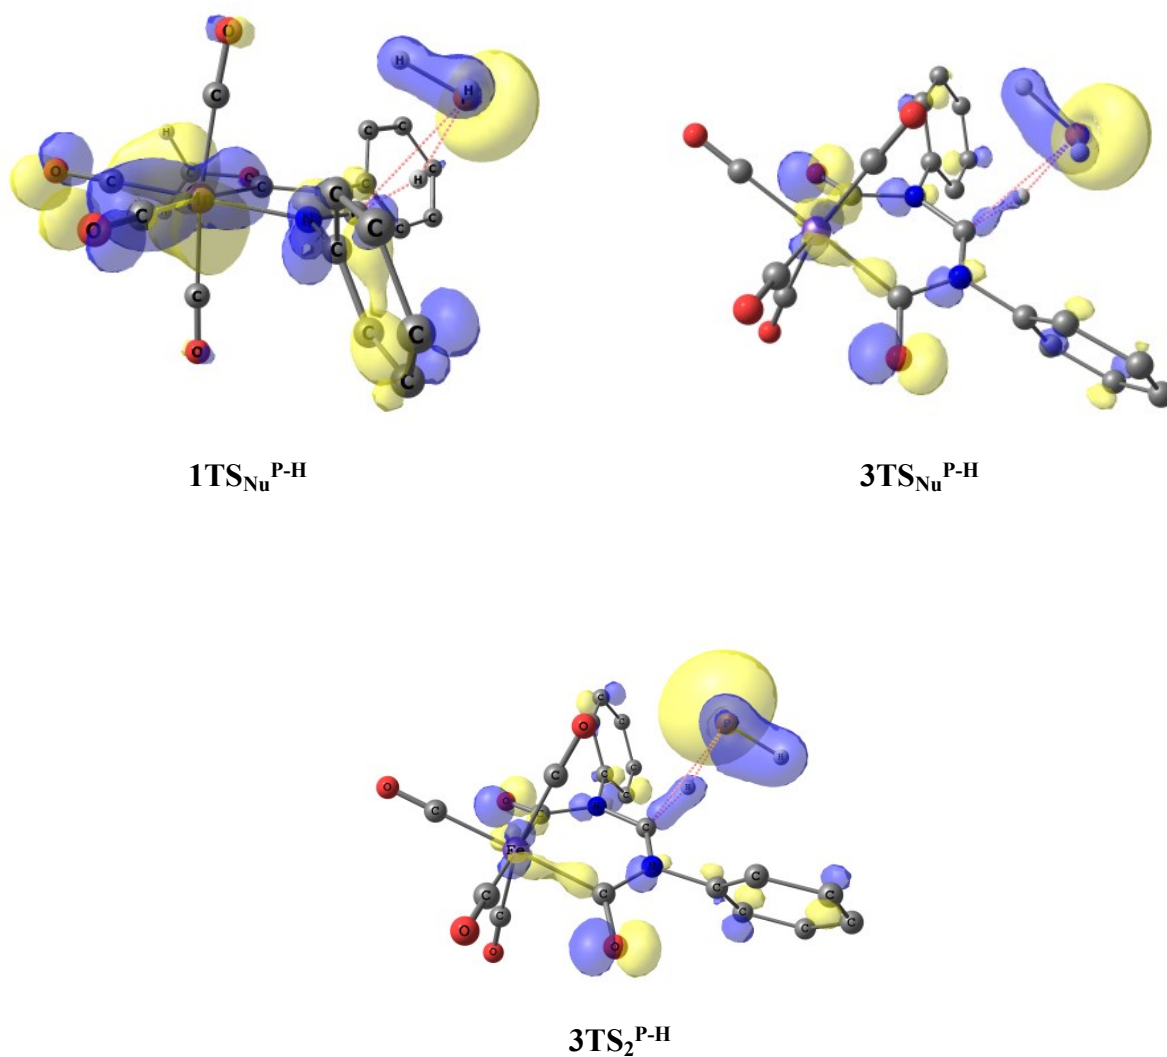

**Fig. S3** Molecular orbitals showing the orientation of the phosphorus lone pair for the TSs ( $1\text{TS}_{\text{Nu}}^{\text{P-H}}$ ,  $3\text{TS}_{\text{Nu}}^{\text{P-H}}$  and  $3\text{TS}_2^{\text{P-H}}$ ) involved in the activation of P- H bond of  $\text{PH}_3$ . The hydrogen atoms of the phenyl rings are omitted for clarity.

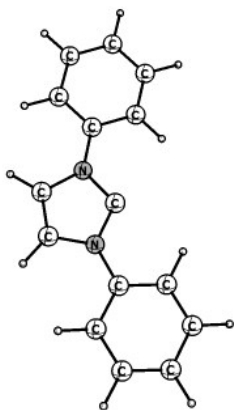

**I-T**

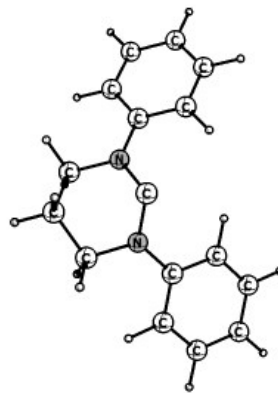

**II-T**

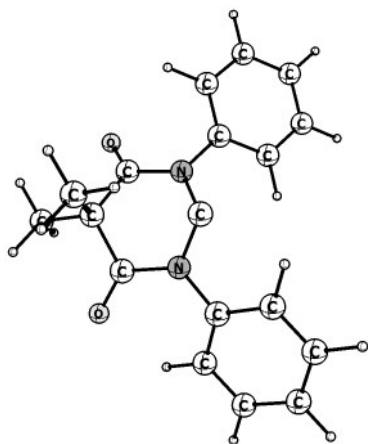

**III-T**

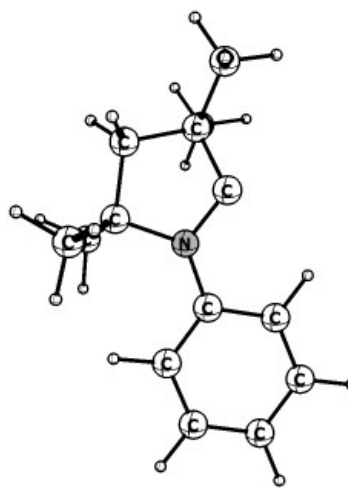

**IV-T**

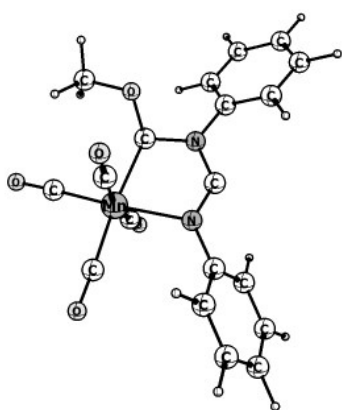

**1-T**

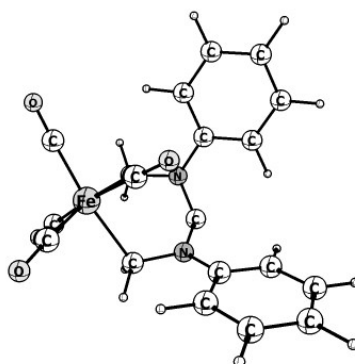

**2-T**

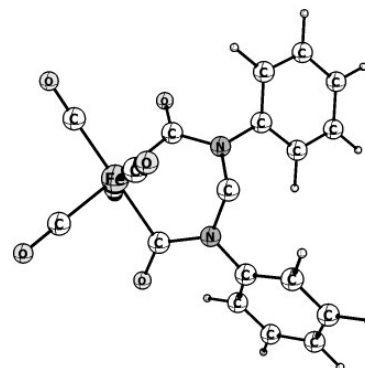

**3-T**

**Fig. S4** Triplet state optimized geometries of **I-IV** and **1-3**.

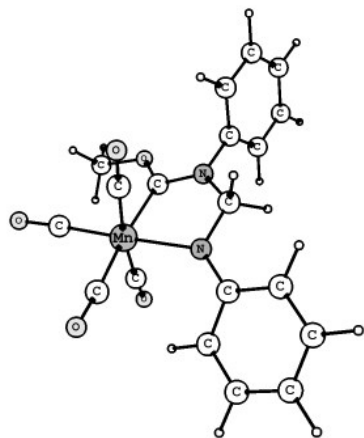

**1P<sup>H-H</sup>**

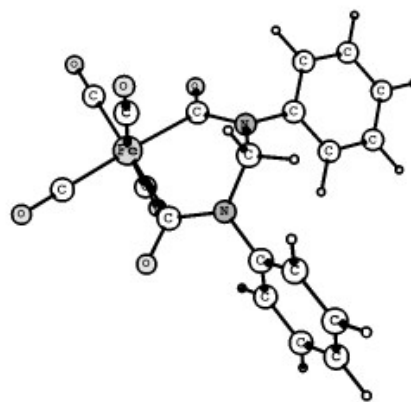

**3P<sup>H-H</sup>**

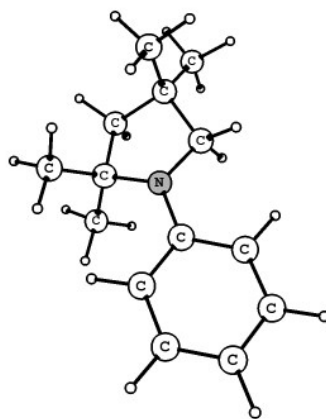

**IVP<sup>H-H</sup>**

**Fig. S5** Optimized geometries of the H-H splitting product obtained for **1**, **3** and CAAC (**IV**).

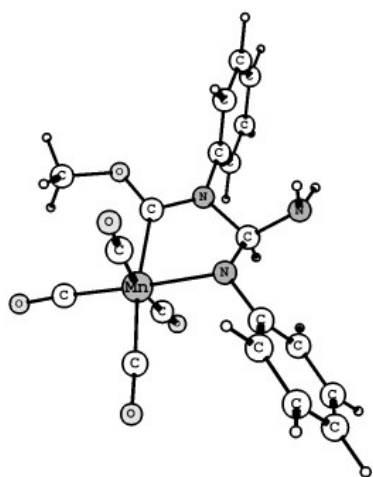

**1PN-H**

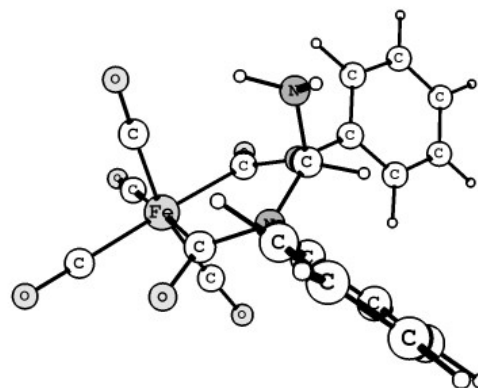

**3PN-H**

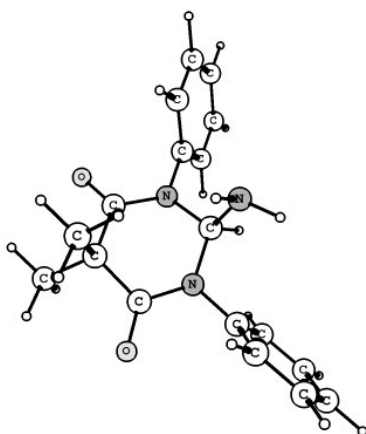

**IIIPN-H**

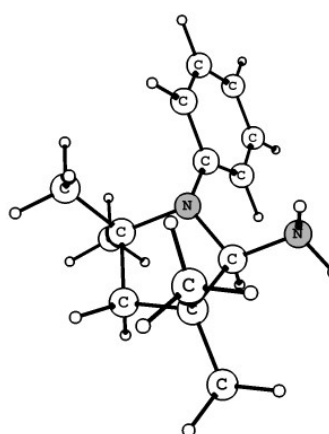

**IVPN-H**

**Fig. S6** Optimized geometries of the N-H bond splitting product obtained for **1**, **3** and **III-IV**.

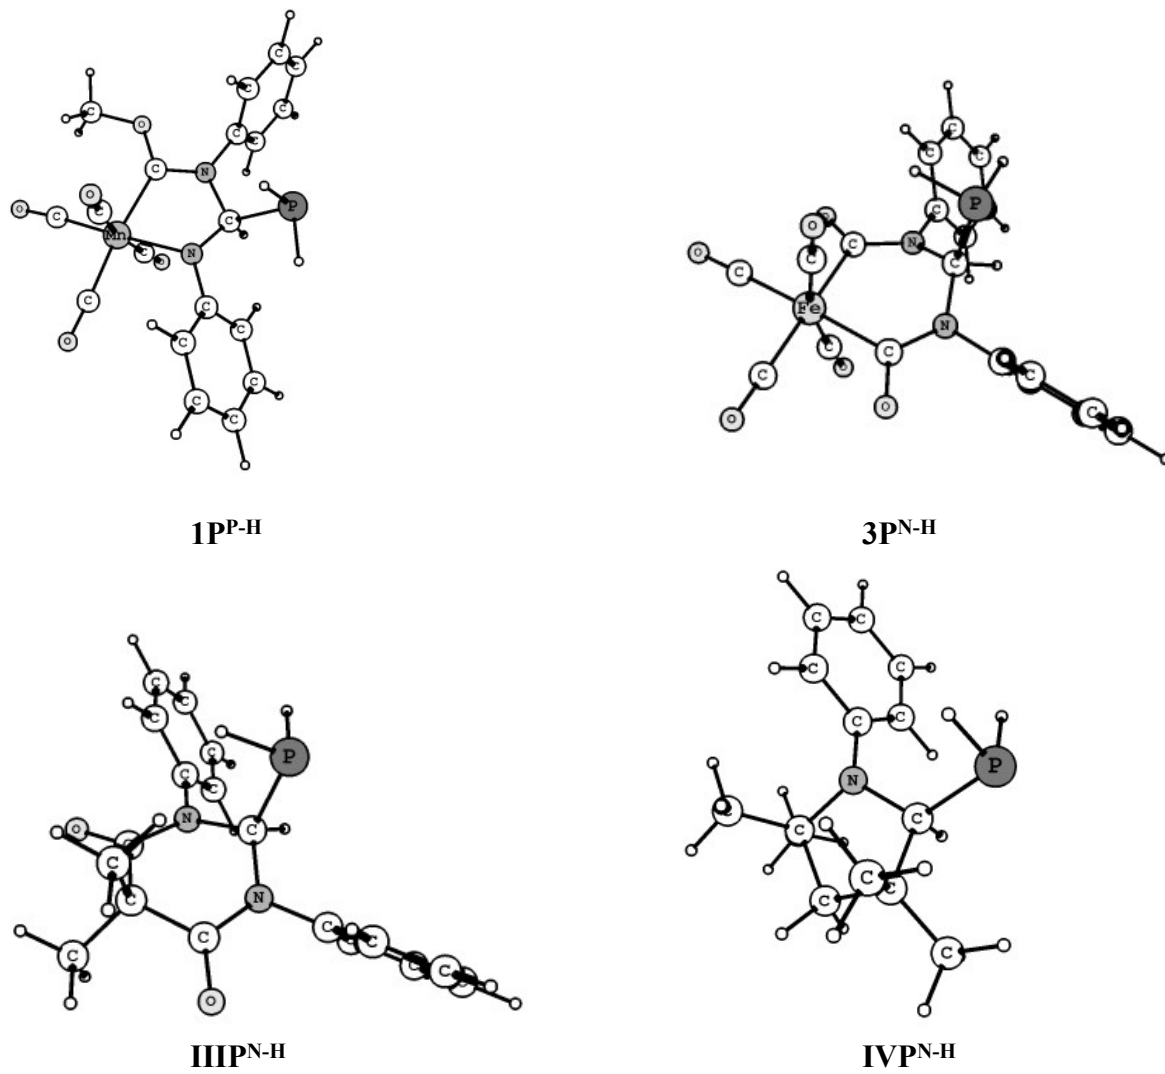

**Fig. S7** Optimized geometries of the P-H bond splitting product obtained for **1**, **3** and **III-IV**.

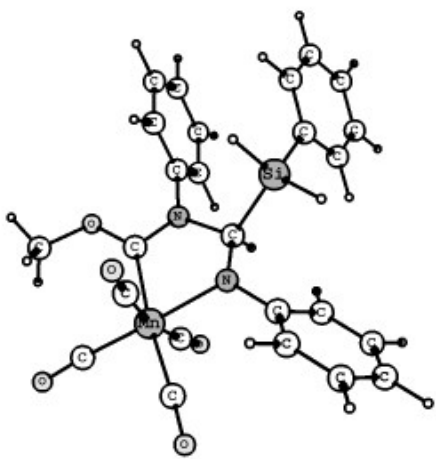

**1<sup>p</sup>Si-H**

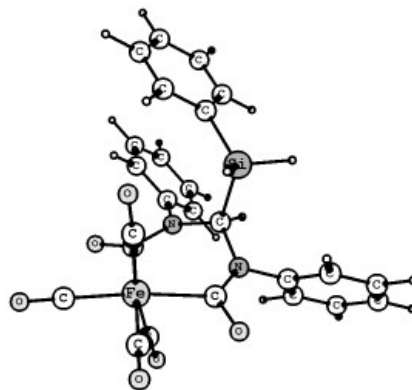

**3<sup>p</sup>Si-H**

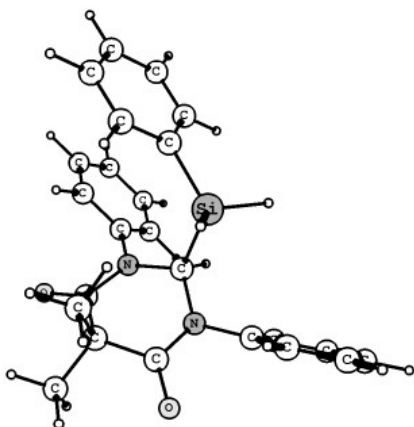

**III<sup>p</sup>Si-H**

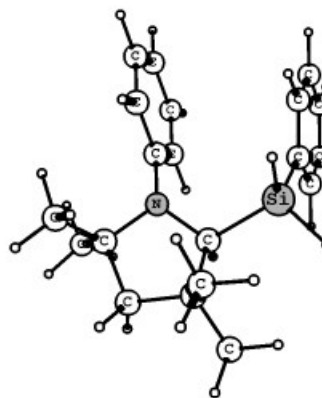

**IV<sup>p</sup>Si-H**

**Fig. S8** Optimized geometries of the Si-H bond splitting product obtained for **1**, **3** and **III-IV**.

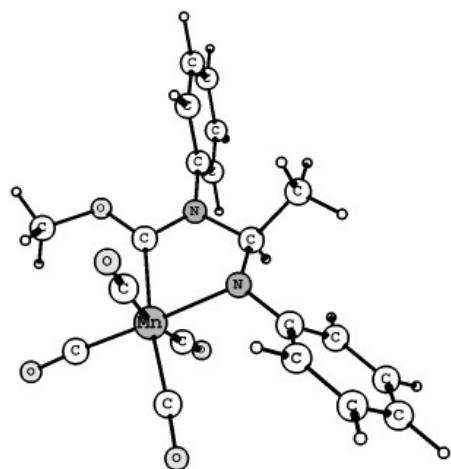

**1PC-H**

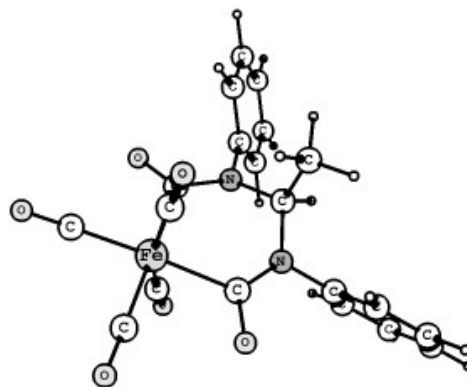

**3PC-H**

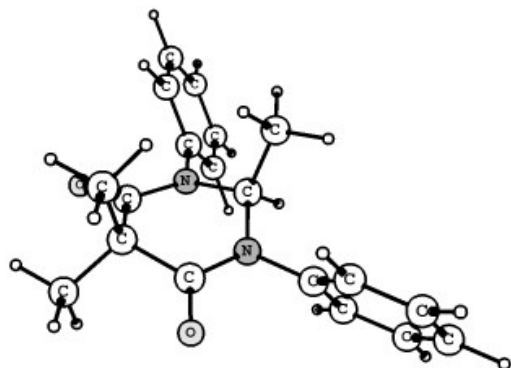

**IIIPC-H**

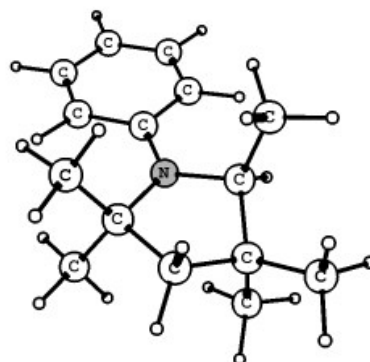

**IVPC-H**

**Fig. S9** Optimized geometries of the C-H bond splitting product obtained for **1**, **3** and **III-IV**.

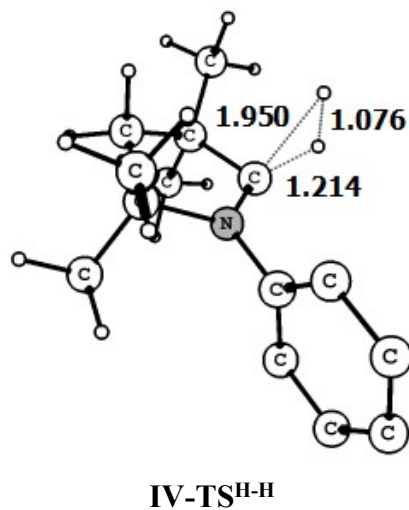

**Fig. S10** Optimized geometry of the transition state obtained for the activation of dihydrogen by CAAC (**IV**). The hydrogen atoms of the phenyl ring are omitted for clarity.

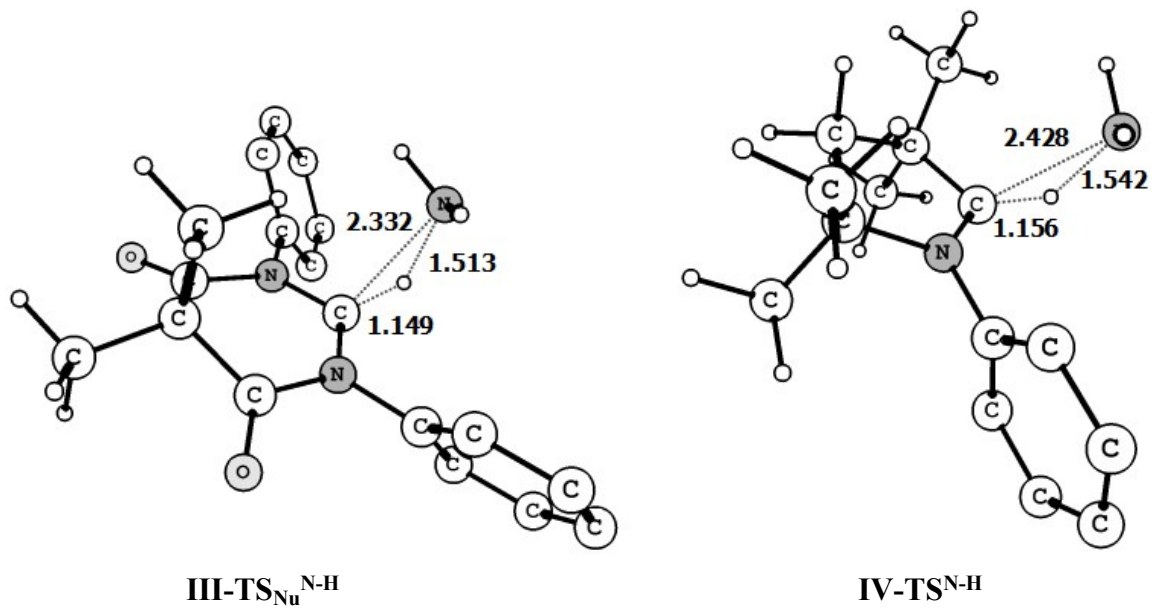

**Fig. S11** Optimized geometry of the transition states obtained for the activation of N – H bond of NH<sub>3</sub> by DAC (**III**) and CAAC (**IV**) via nucleophilic pathway. The hydrogen atoms of the phenyl ring are omitted for clarity.



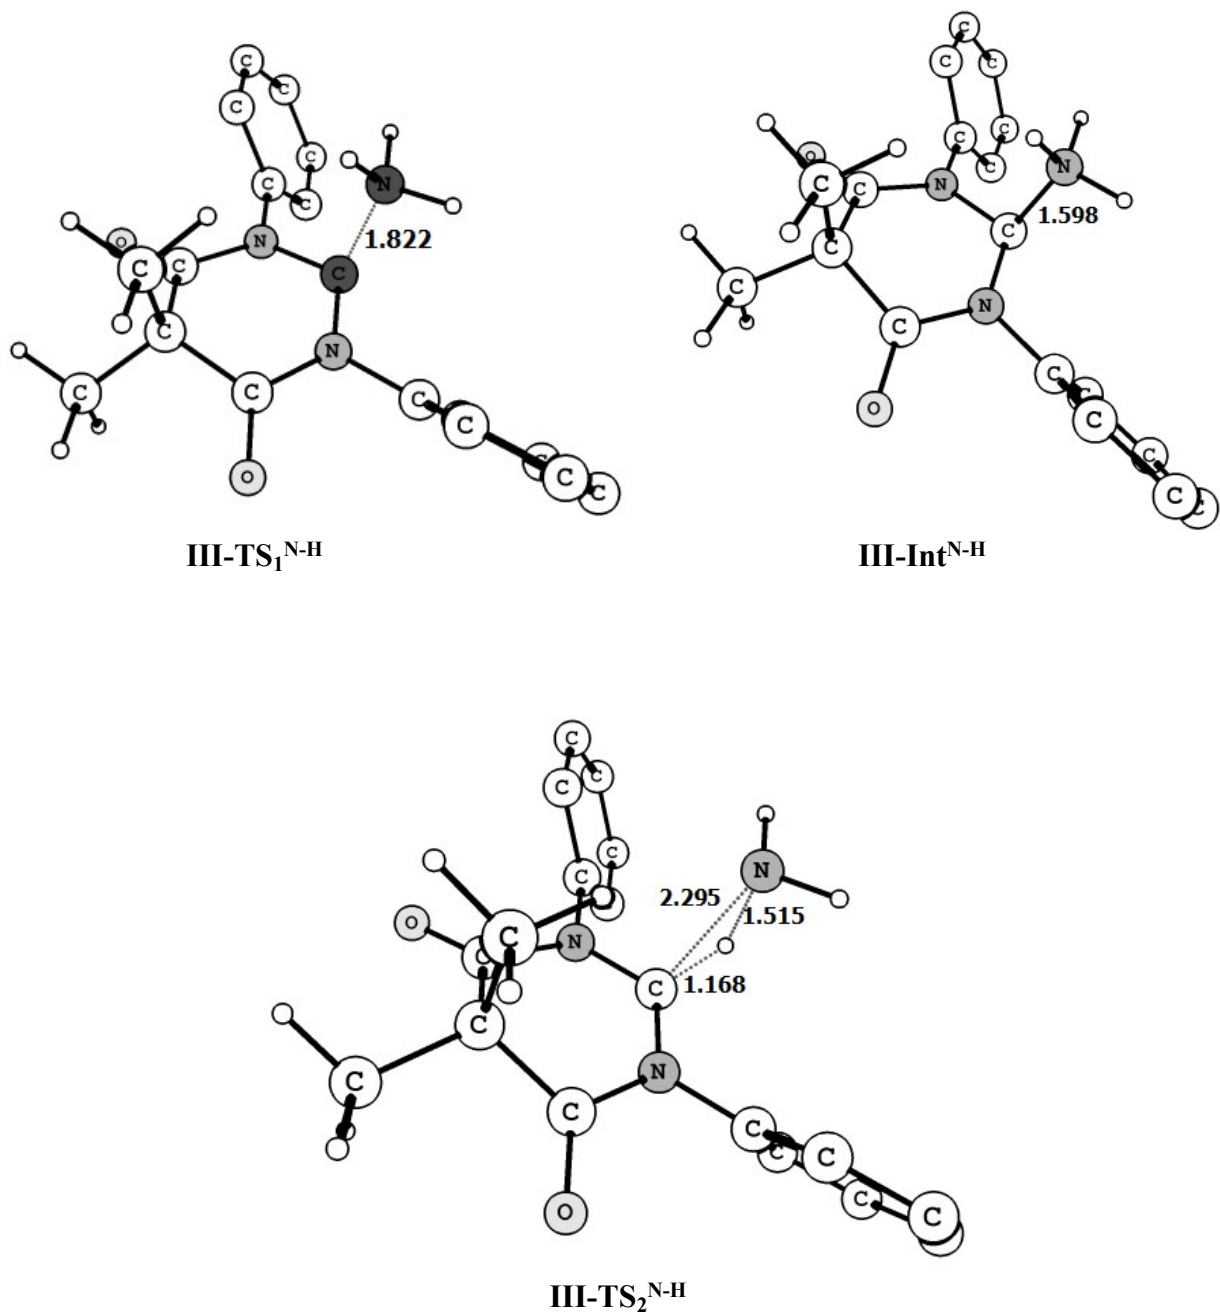

**Fig. S12** Optimized geometries of the transition states and intermediate involved in the activation of N – H bond of  $\text{NH}_3$  by DAC (**III**) via electrophilic pathway. The hydrogen atoms of the phenyl ring are omitted for clarity.

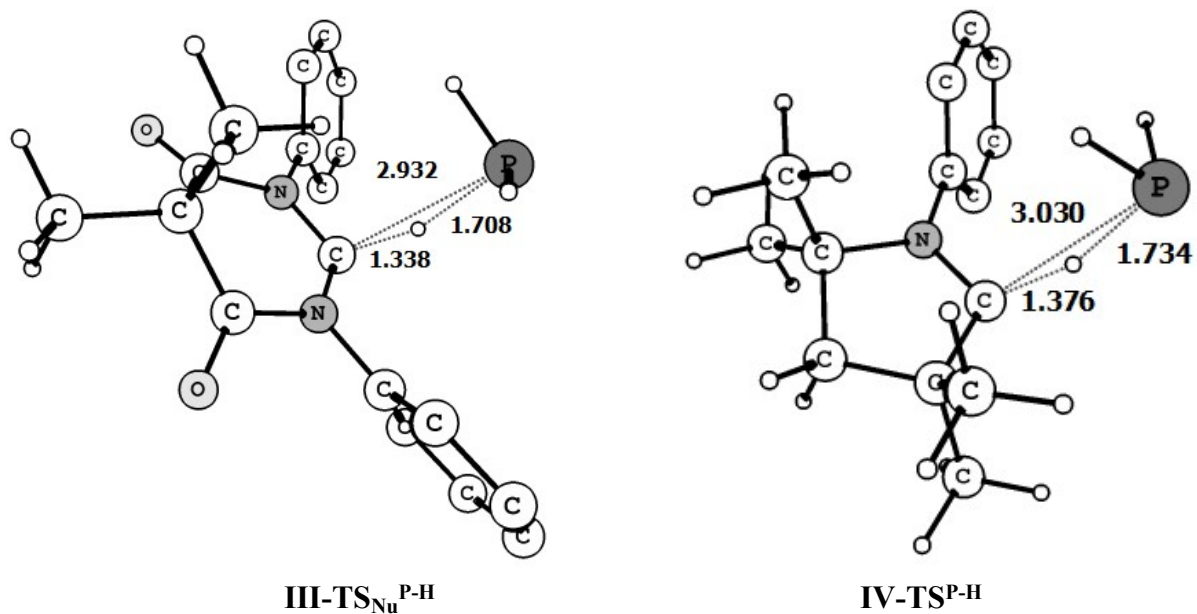

**Fig. S13** Optimized geometry of the transition states obtained for the activation of P – H bond of PH<sub>3</sub> by DAC (**III**) and CAAC (**IV**) via nucleophilic pathway. The hydrogen atoms of the phenyl ring are omitted for clarity.

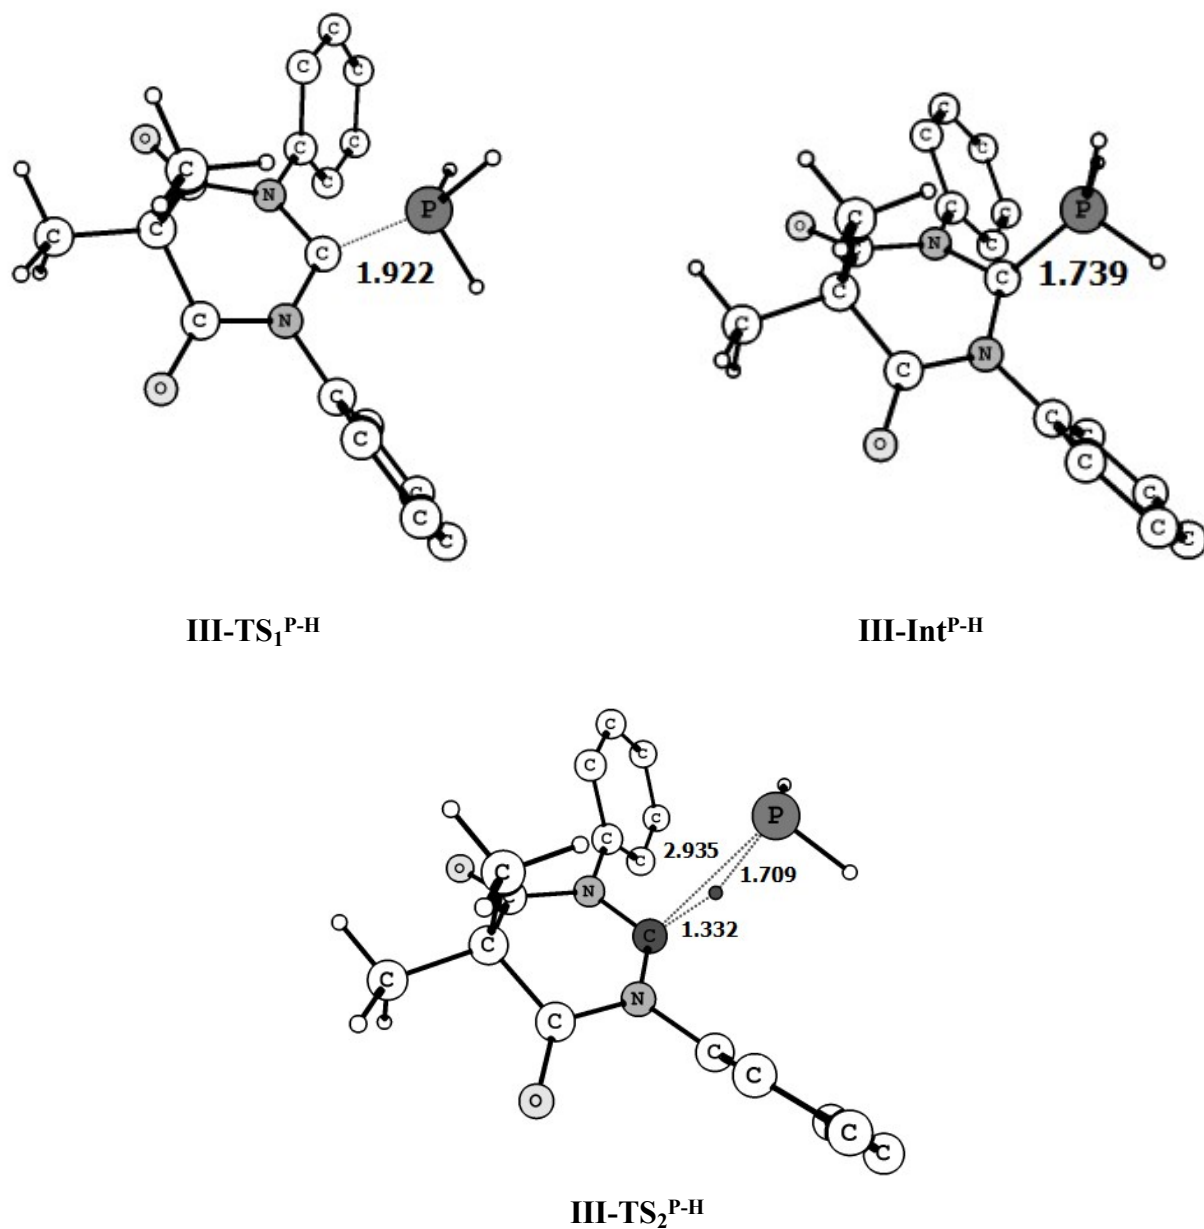

**Fig. S14** Optimized geometries of the transition states and intermediate involved in the activation of P – H bond of PH<sub>3</sub> by DAC (**III**) via electrophilic pathway. The hydrogen atoms of the phenyl ring are omitted for clarity.

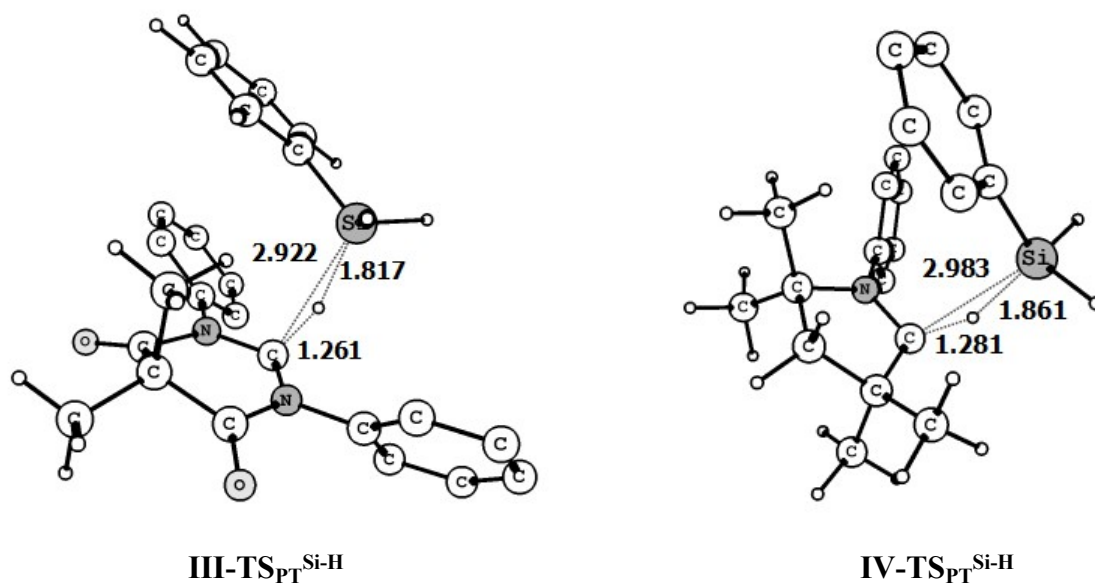

**Fig. S15** Optimized geometries of the transition states involved in the activation of Si – H bond of SiH<sub>3</sub>Ph by DAC (**III**) and CAAC (**IV**) via proton transfer pathway. The hydrogen atoms of the phenyl ring are omitted for clarity.

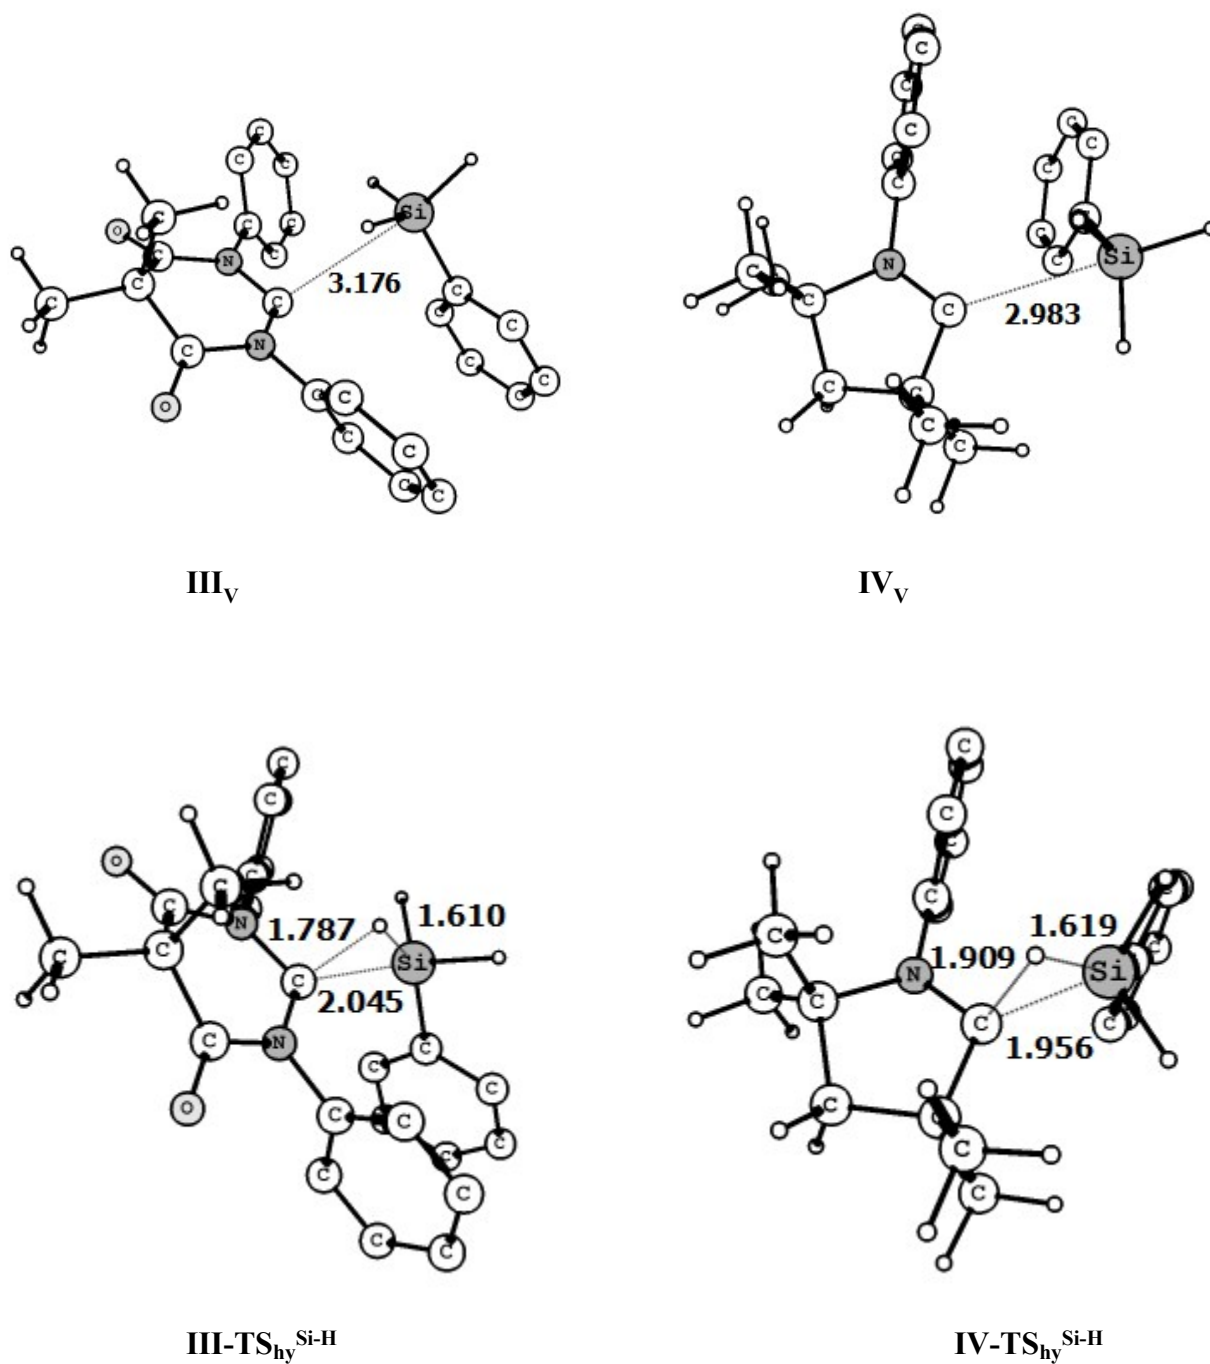

**Fig. S16** Optimized geometries of the van der Waals complexes and transition states involved in the activation of Si – H bond of SiH<sub>3</sub>Ph by DAC (**III**) and CAAC (**IV**) via hydride transfer pathway. The hydrogen atoms of the phenyl ring are omitted for clarity.

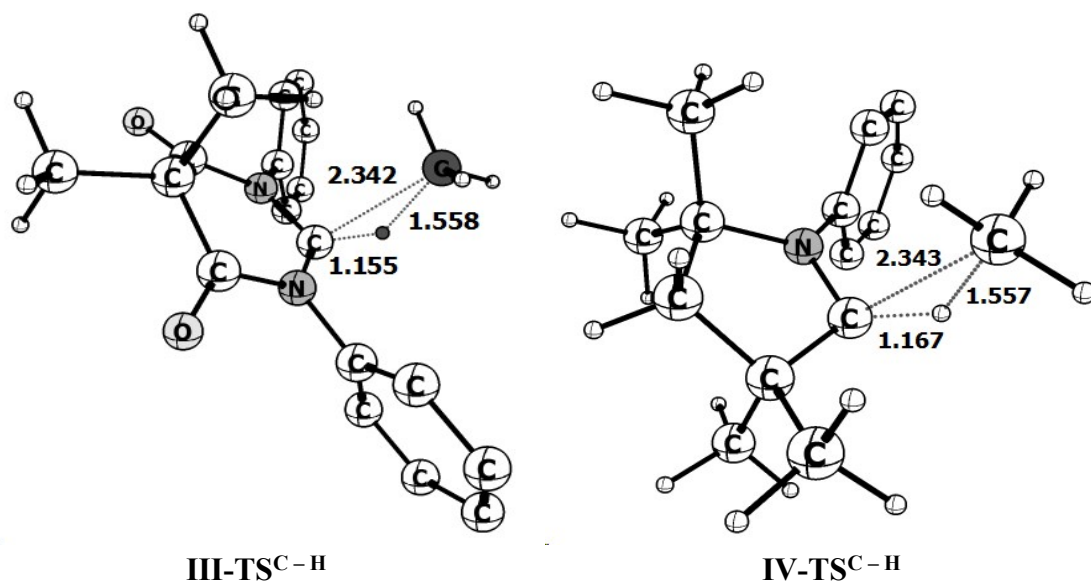

**Fig. S17** Optimized geometries of the transition states involved in the activation of C – H bond of CH<sub>4</sub> by DAC (**III**) and CAAC (**IV**).

Cartesian coordinates of **1-3** and **I-IV** in their optimized singlet and triplet state, along with their total energies (in hartrees) including zero point vibrational correction.

**1-S** (TE = -2367.842935)

|    |              |              |              |
|----|--------------|--------------|--------------|
| 6  | 0.450022000  | -1.438352000 | -0.004860000 |
| 6  | 1.193331000  | 0.841327000  | -0.063858000 |
| 7  | 1.496006000  | -0.465438000 | -0.007609000 |
| 7  | -0.691245000 | -0.836021000 | -0.038885000 |
| 25 | -0.798812000 | 1.226640000  | 0.004160000  |
| 6  | -0.658231000 | 1.088256000  | 1.858634000  |
| 8  | -0.544608000 | 0.982532000  | 2.982702000  |
| 6  | -0.820023000 | 3.044811000  | 0.070035000  |
| 8  | -0.901961000 | 4.184226000  | 0.116625000  |
| 6  | -2.650956000 | 1.205955000  | 0.077672000  |
| 8  | -3.786053000 | 1.197678000  | 0.130860000  |
| 6  | -0.778279000 | 1.213575000  | -1.858844000 |
| 8  | -0.736997000 | 1.197805000  | -2.993291000 |
| 6  | -1.868972000 | -1.627496000 | -0.008057000 |
| 6  | -2.591798000 | -1.844104000 | -1.171886000 |
| 6  | -2.331863000 | -2.136700000 | 1.195789000  |

|   |              |              |              |
|---|--------------|--------------|--------------|
| 6 | -3.773960000 | -2.562202000 | -1.129349000 |
| 1 | -2.215721000 | -1.447895000 | -2.109391000 |
| 6 | -3.517052000 | -2.851601000 | 1.235110000  |
| 1 | -1.749259000 | -1.967339000 | 2.095245000  |
| 6 | -4.243666000 | -3.062331000 | 0.074747000  |
| 1 | -4.331380000 | -2.733049000 | -2.043069000 |
| 1 | -3.873469000 | -3.248188000 | 2.178818000  |
| 1 | -5.172494000 | -3.619245000 | 0.107421000  |
| 6 | 2.844778000  | -0.958506000 | -0.002905000 |
| 6 | 3.280684000  | -1.736713000 | -1.059871000 |
| 6 | 3.680525000  | -0.690289000 | 1.066997000  |
| 6 | 4.569610000  | -2.240754000 | -1.050390000 |
| 1 | 2.599264000  | -1.952690000 | -1.874146000 |
| 6 | 4.968359000  | -1.195606000 | 1.071120000  |
| 1 | 3.315132000  | -0.094401000 | 1.895633000  |
| 6 | 5.415487000  | -1.968996000 | 0.012208000  |
| 1 | 4.912246000  | -2.852831000 | -1.876205000 |
| 1 | 5.622768000  | -0.990538000 | 1.910067000  |
| 1 | 6.423196000  | -2.367258000 | 0.019297000  |
| 8 | 2.262224000  | 1.585827000  | -0.161379000 |
| 6 | 2.162806000  | 2.998203000  | -0.274249000 |
| 1 | 1.550226000  | 3.274994000  | -1.132737000 |
| 1 | 1.752939000  | 3.428578000  | 0.639379000  |
| 1 | 3.177863000  | 3.358654000  | -0.421277000 |

**1-T (TE = -2367.773420)**

|    |              |              |              |
|----|--------------|--------------|--------------|
| 6  | 0.397945000  | 1.191654000  | -0.173435000 |
| 6  | 1.200629000  | -0.979787000 | -0.012082000 |
| 7  | 1.462997000  | 0.411516000  | -0.102754000 |
| 7  | -0.812078000 | 0.806425000  | -0.296104000 |
| 25 | -0.848840000 | -1.318985000 | 0.079143000  |
| 6  | -0.637935000 | -1.632744000 | -1.742541000 |
| 8  | -0.421979000 | -1.812591000 | -2.843383000 |
| 6  | -0.756105000 | -3.079779000 | 0.481830000  |
| 8  | -0.730940000 | -4.187699000 | 0.762722000  |
| 6  | -2.688625000 | -1.424393000 | 0.085959000  |
| 8  | -3.822629000 | -1.540195000 | 0.089501000  |
| 6  | -0.716310000 | -0.861956000 | 1.896583000  |
| 8  | -0.577745000 | -0.563721000 | 2.982048000  |
| 6  | -1.907515000 | 1.682396000  | -0.181796000 |

|   |              |              |              |
|---|--------------|--------------|--------------|
| 6 | -3.003523000 | 1.520756000  | -1.020127000 |
| 6 | -1.913626000 | 2.699005000  | 0.768567000  |
| 6 | -4.092062000 | 2.365752000  | -0.907378000 |
| 1 | -2.985409000 | 0.735573000  | -1.768065000 |
| 6 | -3.004276000 | 3.542502000  | 0.872659000  |
| 1 | -1.057141000 | 2.810458000  | 1.425741000  |
| 6 | -4.098521000 | 3.378967000  | 0.038242000  |
| 1 | -4.940679000 | 2.233764000  | -1.568265000 |
| 1 | -3.001322000 | 4.330185000  | 1.617198000  |
| 1 | -4.953698000 | 4.038201000  | 0.124984000  |
| 6 | 2.765676000  | 0.996112000  | -0.067250000 |
| 6 | 3.735692000  | 0.469006000  | 0.771118000  |
| 6 | 3.035740000  | 2.108920000  | -0.846352000 |
| 6 | 4.982040000  | 1.063637000  | 0.823315000  |
| 1 | 3.501828000  | -0.394226000 | 1.383355000  |
| 6 | 4.282618000  | 2.705740000  | -0.776424000 |
| 1 | 2.268060000  | 2.495682000  | -1.507844000 |
| 6 | 5.259705000  | 2.182656000  | 0.053090000  |
| 1 | 5.741388000  | 0.654027000  | 1.478889000  |
| 1 | 4.492484000  | 3.578005000  | -1.383907000 |
| 1 | 6.238266000  | 2.645150000  | 0.099623000  |
| 8 | 2.212254000  | -1.649348000 | -0.613793000 |
| 6 | 2.323739000  | -3.015156000 | -0.301413000 |
| 1 | 2.300937000  | -3.173976000 | 0.782446000  |
| 1 | 1.519120000  | -3.596363000 | -0.763759000 |
| 1 | 3.277329000  | -3.358746000 | -0.699099000 |

**2-S (TE = -2405.888257)**

|   |              |              |              |
|---|--------------|--------------|--------------|
| 6 | -1.319194000 | 0.685845000  | -0.863716000 |
| 6 | -0.003463000 | -1.425011000 | -0.446388000 |
| 6 | 1.317341000  | 0.679997000  | -0.869666000 |
| 7 | 1.142583000  | -0.736938000 | -0.568567000 |
| 7 | -1.147070000 | -0.732731000 | -0.567000000 |
| 6 | 2.343632000  | -1.478636000 | -0.349642000 |
| 6 | 3.450776000  | -1.284761000 | -1.165485000 |
| 6 | 2.415816000  | -2.396289000 | 0.690216000  |
| 6 | 4.613339000  | -2.003767000 | -0.944775000 |
| 1 | 3.395404000  | -0.584852000 | -1.991278000 |
| 6 | 3.578741000  | -3.112414000 | 0.904860000  |
| 1 | 1.542781000  | -2.540913000 | 1.314830000  |



|    |              |              |              |
|----|--------------|--------------|--------------|
| 6  | 4.683786000  | -2.919832000 | 0.090479000  |
| 1  | 5.466470000  | -1.851147000 | -1.595802000 |
| 1  | 3.623777000  | -3.823491000 | 1.721844000  |
| 1  | 5.594329000  | -3.481541000 | 0.262074000  |
| 6  | -2.350356000 | -1.471265000 | -0.348700000 |
| 6  | -3.456662000 | -1.273504000 | -1.164690000 |
| 6  | -2.425479000 | -2.389328000 | 0.690547000  |
| 6  | -4.621352000 | -1.989357000 | -0.944890000 |
| 1  | -3.398991000 | -0.572896000 | -1.989740000 |
| 6  | -3.590551000 | -3.102206000 | 0.904380000  |
| 1  | -1.553045000 | -2.536885000 | 1.315310000  |
| 6  | -4.694725000 | -2.905958000 | 0.089697000  |
| 1  | -5.473851000 | -1.833849000 | -1.596063000 |
| 1  | -3.637930000 | -3.813672000 | 1.720894000  |
| 1  | -5.606908000 | -3.465226000 | 0.260556000  |
| 1  | 1.187866000  | 0.852525000  | -1.940360000 |
| 1  | 2.341093000  | 0.950060000  | -0.616184000 |
| 1  | -2.340629000 | 0.957794000  | -0.602720000 |
| 1  | -1.196671000 | 0.860780000  | -1.934831000 |
| 26 | 0.004005000  | 1.945046000  | 0.154027000  |
| 6  | 0.002412000  | 0.748056000  | 1.540108000  |
| 6  | -1.399225000 | 2.877472000  | 0.869204000  |
| 6  | 0.004121000  | 2.908767000  | -1.388156000 |
| 6  | 1.415009000  | 2.869100000  | 0.864644000  |
| 8  | 0.003761000  | 3.444055000  | -2.385319000 |
| 8  | 2.312593000  | 3.420735000  | 1.281716000  |
| 8  | -2.292141000 | 3.434620000  | 1.288954000  |
| 8  | 0.000763000  | 0.012884000  | 2.398095000  |

**2-T (TE = -2405.814365)**

|   |              |              |              |
|---|--------------|--------------|--------------|
| 6 | -0.715811000 | 1.573618000  | 1.100568000  |
| 6 | 0.826098000  | -0.085372000 | 1.796535000  |
| 6 | -1.211684000 | -1.155955000 | 1.285604000  |
| 7 | 0.219953000  | -1.226685000 | 1.309794000  |
| 7 | 0.650260000  | 1.138486000  | 1.182191000  |
| 6 | 0.941383000  | -2.198864000 | 0.608376000  |
| 6 | 0.310297000  | -3.197750000 | -0.136287000 |
| 6 | 2.338493000  | -2.180057000 | 0.641807000  |
| 6 | 1.060097000  | -4.131296000 | -0.831146000 |
| 1 | -0.768814000 | -3.248178000 | -0.198188000 |

|    |              |              |              |
|----|--------------|--------------|--------------|
| 6  | 3.072434000  | -3.116807000 | -0.055022000 |
| 1  | 2.841583000  | -1.424613000 | 1.232744000  |
| 6  | 2.442503000  | -4.101479000 | -0.801593000 |
| 1  | 0.545378000  | -4.890054000 | -1.409713000 |
| 1  | 4.154848000  | -3.077501000 | -0.010464000 |
| 1  | 3.021988000  | -4.834518000 | -1.348951000 |
| 6  | 1.702359000  | 1.799847000  | 0.542191000  |
| 6  | 1.481445000  | 2.806125000  | -0.399984000 |
| 6  | 3.021110000  | 1.455513000  | 0.850672000  |
| 6  | 2.550492000  | 3.428775000  | -1.020349000 |
| 1  | 0.475143000  | 3.093601000  | -0.677975000 |
| 6  | 4.076955000  | 2.084178000  | 0.223840000  |
| 1  | 3.203630000  | 0.707324000  | 1.613165000  |
| 6  | 3.853962000  | 3.075586000  | -0.719849000 |
| 1  | 2.352744000  | 4.198625000  | -1.757621000 |
| 1  | 5.090203000  | 1.801544000  | 0.485949000  |
| 1  | 4.685079000  | 3.567962000  | -1.209311000 |
| 1  | -1.538676000 | -0.821587000 | 2.271134000  |
| 1  | -1.648677000 | -2.134717000 | 1.103690000  |
| 1  | -0.763955000 | 2.609240000  | 0.772686000  |
| 1  | -1.138206000 | 1.521360000  | 2.105688000  |
| 26 | -1.938468000 | 0.302029000  | -0.121884000 |
| 6  | -0.468601000 | -0.001427000 | -1.179139000 |
| 6  | -2.408145000 | 1.765172000  | -1.102898000 |
| 6  | -3.196550000 | 0.595529000  | 1.151088000  |
| 6  | -2.885637000 | -1.026149000 | -0.937307000 |
| 8  | -3.926227000 | 0.773227000  | 1.999180000  |
| 8  | -3.455881000 | -1.888219000 | -1.405300000 |
| 8  | -2.670722000 | 2.708781000  | -1.675733000 |
| 8  | 0.433981000  | -0.173660000 | -1.836945000 |

**3-S** (TE = -2554.009118)

|   |              |              |              |
|---|--------------|--------------|--------------|
| 6 | -1.446960000 | 0.622565000  | 0.256118000  |
| 7 | -1.169958000 | -0.763417000 | 0.054553000  |
| 6 | 0.000036000  | -1.430221000 | -0.000230000 |
| 7 | 1.170003000  | -0.763325000 | -0.054776000 |
| 6 | 1.446993000  | 0.622714000  | -0.255816000 |
| 8 | -2.561680000 | 0.953524000  | 0.552020000  |
| 6 | -2.337873000 | -1.621905000 | 0.059339000  |
| 6 | -3.214782000 | -1.570104000 | -1.007476000 |

|    |              |              |              |
|----|--------------|--------------|--------------|
| 6  | -4.324240000 | -2.396691000 | -1.018810000 |
| 6  | -4.552907000 | -3.266022000 | 0.035410000  |
| 6  | -3.668232000 | -3.309097000 | 1.100534000  |
| 6  | -2.557074000 | -2.483913000 | 1.115330000  |
| 1  | -3.022176000 | -0.883687000 | -1.825550000 |
| 1  | -5.011180000 | -2.363432000 | -1.856148000 |
| 1  | -5.421350000 | -3.914014000 | 0.025169000  |
| 1  | -3.842236000 | -3.990069000 | 1.925292000  |
| 1  | -1.845760000 | -2.512849000 | 1.932467000  |
| 6  | 2.337965000  | -1.621752000 | -0.059493000 |
| 6  | 2.557496000  | -2.483443000 | -1.115671000 |
| 6  | 3.668683000  | -3.308589000 | -1.100795000 |
| 6  | 4.553051000  | -3.265785000 | -0.035406000 |
| 6  | 4.324053000  | -2.396761000 | 1.018998000  |
| 6  | 3.214566000  | -1.570214000 | 1.007586000  |
| 1  | 1.846415000  | -2.512170000 | -1.933018000 |
| 1  | 3.842945000  | -3.989320000 | -1.925698000 |
| 1  | 5.421514000  | -3.913748000 | -0.025101000 |
| 1  | 5.010756000  | -2.363715000 | 1.856538000  |
| 1  | 3.021689000  | -0.884026000 | 1.825791000  |
| 8  | 2.561816000  | 0.953857000  | -0.551128000 |
| 26 | -0.000081000 | 1.991140000  | 0.000013000  |
| 6  | 0.340006000  | 1.689151000  | 1.768027000  |
| 8  | 0.562513000  | 1.424488000  | 2.844997000  |
| 6  | -0.340047000 | 1.688934000  | -1.767984000 |
| 8  | -0.562307000 | 1.424314000  | -2.845016000 |
| 6  | -1.323508000 | 3.292789000  | 0.253878000  |
| 8  | -2.114535000 | 4.080332000  | 0.405338000  |
| 6  | 1.323152000  | 3.292961000  | -0.254038000 |
| 8  | 2.114058000  | 4.080595000  | -0.405650000 |

**3-T (TE = -2553.951406)**

|   |              |              |              |
|---|--------------|--------------|--------------|
| 6 | -0.839337000 | 1.460786000  | -0.262789000 |
| 7 | 0.463618000  | 1.259986000  | 0.222506000  |
| 6 | 0.730450000  | 0.054667000  | 0.815923000  |
| 7 | 0.589907000  | -1.178547000 | 0.225555000  |
| 6 | -0.700903000 | -1.561567000 | -0.165362000 |
| 8 | -1.139608000 | 2.461502000  | -0.859954000 |
| 6 | 1.529515000  | 2.193813000  | 0.038922000  |
| 6 | 1.330511000  | 3.555969000  | 0.210945000  |

|    |              |              |              |
|----|--------------|--------------|--------------|
| 6  | 2.396250000  | 4.423645000  | 0.052578000  |
| 6  | 3.657063000  | 3.944113000  | -0.263217000 |
| 6  | 3.851308000  | 2.582257000  | -0.423348000 |
| 6  | 2.791239000  | 1.706581000  | -0.276383000 |
| 1  | 0.348629000  | 3.930202000  | 0.464737000  |
| 1  | 2.238219000  | 5.487410000  | 0.185920000  |
| 1  | 4.486861000  | 4.630486000  | -0.381869000 |
| 1  | 4.832930000  | 2.195402000  | -0.670078000 |
| 1  | 2.937381000  | 0.639207000  | -0.408990000 |
| 6  | 1.738679000  | -2.024567000 | 0.138761000  |
| 6  | 2.694290000  | -1.945750000 | 1.144443000  |
| 6  | 3.845371000  | -2.707814000 | 1.064935000  |
| 6  | 4.043670000  | -3.559558000 | -0.008622000 |
| 6  | 3.086249000  | -3.635829000 | -1.006440000 |
| 6  | 1.934829000  | -2.870766000 | -0.943419000 |
| 1  | 2.525273000  | -1.283246000 | 1.987088000  |
| 1  | 4.586072000  | -2.639502000 | 1.852846000  |
| 1  | 4.942433000  | -4.161498000 | -0.068271000 |
| 1  | 3.237566000  | -4.293740000 | -1.854149000 |
| 1  | 1.195354000  | -2.925307000 | -1.729285000 |
| 8  | -0.922359000 | -2.647427000 | -0.635186000 |
| 26 | -2.146970000 | -0.105689000 | 0.044569000  |
| 6  | -2.098616000 | -0.170084000 | -1.785306000 |
| 8  | -2.026143000 | -0.210404000 | -2.911689000 |
| 6  | -1.756266000 | -0.033572000 | 1.838506000  |
| 8  | -1.600736000 | 0.008402000  | 2.959430000  |
| 6  | -3.446718000 | 1.211142000  | 0.150207000  |
| 8  | -4.226000000 | 2.025301000  | 0.207825000  |
| 6  | -3.329693000 | -1.520315000 | 0.242412000  |
| 8  | -4.039094000 | -2.389934000 | 0.358373000  |

**I-S (TE = -687.771091)**

|   |              |              |              |
|---|--------------|--------------|--------------|
| 6 | -0.000001000 | 0.348905000  | -0.082099000 |
| 6 | 0.670277000  | -1.746075000 | 0.546092000  |
| 6 | -0.670270000 | -1.746074000 | 0.546104000  |
| 1 | 1.367598000  | -2.518454000 | 0.822584000  |
| 1 | -1.367588000 | -2.518455000 | 0.822599000  |
| 7 | 1.060128000  | -0.467966000 | 0.162728000  |
| 7 | -1.060126000 | -0.467966000 | 0.162736000  |
| 6 | -2.408784000 | -0.055393000 | 0.020909000  |

|   |              |              |              |
|---|--------------|--------------|--------------|
| 6 | -3.387175000 | -0.972804000 | -0.331285000 |
| 6 | -2.746092000 | 1.273034000  | 0.234545000  |
| 6 | -4.702770000 | -0.561119000 | -0.459665000 |
| 1 | -3.119741000 | -2.004124000 | -0.529026000 |
| 6 | -4.060549000 | 1.676497000  | 0.094276000  |
| 1 | -1.965638000 | 1.972690000  | 0.504963000  |
| 6 | -5.045077000 | 0.762967000  | -0.248533000 |
| 1 | -5.461863000 | -1.282488000 | -0.738418000 |
| 1 | -4.318986000 | 2.715440000  | 0.262572000  |
| 1 | -6.074725000 | 1.083376000  | -0.352790000 |
| 6 | 2.408785000  | -0.055393000 | 0.020886000  |
| 6 | 3.387165000  | -0.972800000 | -0.331348000 |
| 6 | 2.746100000  | 1.273028000  | 0.234547000  |
| 6 | 4.702759000  | -0.561117000 | -0.459742000 |
| 1 | 3.119722000  | -2.004114000 | -0.529107000 |
| 6 | 4.060556000  | 1.676490000  | 0.094262000  |
| 1 | 1.965653000  | 1.972680000  | 0.504997000  |
| 6 | 5.045075000  | 0.762963000  | -0.248586000 |
| 1 | 5.461844000  | -1.282482000 | -0.738527000 |
| 1 | 4.319001000  | 2.715428000  | 0.262577000  |
| 1 | 6.074722000  | 1.083372000  | -0.352856000 |

**I-T (TE = -687.660750)**

|   |              |              |              |
|---|--------------|--------------|--------------|
| 6 | 0.000000000  | 0.188850000  | 0.000021000  |
| 6 | -0.670986000 | -1.916326000 | 0.000060000  |
| 6 | 0.670986000  | -1.916326000 | 0.000060000  |
| 1 | -1.346978000 | -2.753549000 | 0.000080000  |
| 1 | 1.346978000  | -2.753550000 | 0.000083000  |
| 7 | -1.129157000 | -0.600364000 | 0.000070000  |
| 7 | 1.129157000  | -0.600364000 | 0.000060000  |
| 6 | -2.423551000 | -0.119589000 | 0.000015000  |
| 6 | -2.614918000 | 1.265755000  | 0.000048000  |
| 6 | -3.532595000 | -0.967501000 | -0.000071000 |
| 6 | -3.893934000 | 1.785147000  | 0.000023000  |
| 1 | -1.745521000 | 1.918361000  | 0.000064000  |
| 6 | -4.802832000 | -0.429051000 | -0.000090000 |
| 1 | -3.404325000 | -2.043064000 | -0.000139000 |
| 6 | -4.998367000 | 0.946854000  | -0.000036000 |
| 1 | -4.029239000 | 2.860771000  | 0.000051000  |
| 1 | -5.657030000 | -1.096488000 | -0.000163000 |

|   |              |              |              |
|---|--------------|--------------|--------------|
| 1 | -5.999989000 | 1.358236000  | -0.000045000 |
| 6 | 2.423551000  | -0.119588000 | 0.000008000  |
| 6 | 2.614918000  | 1.265755000  | 0.000017000  |
| 6 | 3.532595000  | -0.967502000 | -0.000050000 |
| 6 | 3.893934000  | 1.785147000  | -0.000004000 |
| 1 | 1.745522000  | 1.918361000  | 0.000007000  |
| 6 | 4.802832000  | -0.429051000 | -0.000067000 |
| 1 | 3.404325000  | -2.043065000 | -0.000095000 |
| 6 | 4.998367000  | 0.946854000  | -0.000036000 |
| 1 | 4.029239000  | 2.860771000  | 0.000006000  |
| 1 | 5.657030000  | -1.096488000 | -0.000116000 |
| 1 | 5.999989000  | 1.358235000  | -0.000041000 |

**II-S (TE = -728.217605)**

|   |              |              |              |
|---|--------------|--------------|--------------|
| 6 | -1.227226000 | 2.102399000  | 0.145231000  |
| 6 | -0.000005000 | -0.064052000 | 0.042320000  |
| 6 | 1.227252000  | 2.102379000  | 0.145344000  |
| 6 | -0.000015000 | 2.633590000  | 0.834670000  |
| 7 | 1.143109000  | 0.639395000  | 0.068987000  |
| 7 | -1.143105000 | 0.639411000  | 0.068953000  |
| 6 | 2.370367000  | -0.071348000 | -0.028530000 |
| 6 | 3.495515000  | 0.535385000  | -0.574838000 |
| 6 | 2.465048000  | -1.382743000 | 0.426585000  |
| 6 | 4.691033000  | -0.159831000 | -0.666249000 |
| 1 | 3.444607000  | 1.548525000  | -0.953475000 |
| 6 | 3.659738000  | -2.068040000 | 0.329911000  |
| 1 | 1.583157000  | -1.847979000 | 0.846359000  |
| 6 | 4.782471000  | -1.463210000 | -0.215740000 |
| 1 | 5.555208000  | 0.328366000  | -1.102063000 |
| 1 | 3.716323000  | -3.087635000 | 0.694128000  |
| 1 | 5.718415000  | -2.004320000 | -0.286439000 |
| 6 | -2.370370000 | -0.071322000 | -0.028530000 |
| 6 | -3.495429000 | 0.535300000  | -0.575142000 |
| 6 | -2.465137000 | -1.382586000 | 0.426932000  |
| 6 | -4.690951000 | -0.159912000 | -0.666525000 |
| 1 | -3.444433000 | 1.548339000  | -0.954039000 |
| 6 | -3.659830000 | -2.067883000 | 0.330283000  |
| 1 | -1.583313000 | -1.847721000 | 0.846963000  |
| 6 | -4.782474000 | -1.463171000 | -0.215682000 |
| 1 | -5.555058000 | 0.328185000  | -1.102583000 |

|   |              |              |              |
|---|--------------|--------------|--------------|
| 1 | -3.716492000 | -3.087378000 | 0.694770000  |
| 1 | -5.718420000 | -2.004279000 | -0.286361000 |
| 1 | 1.318395000  | 2.531273000  | -0.860314000 |
| 1 | 2.129595000  | 2.370527000  | 0.697916000  |
| 1 | 0.000000000  | 3.724413000  | 0.820170000  |
| 1 | -0.000069000 | 2.316467000  | 1.881920000  |
| 1 | -2.129626000 | 2.370595000  | 0.697687000  |
| 1 | -1.318240000 | 2.531252000  | -0.860457000 |

**H-T (TE = -728.132541)**

|   |              |              |              |
|---|--------------|--------------|--------------|
| 6 | 1.384201000  | 2.284644000  | -0.169333000 |
| 6 | -0.000317000 | 0.462402000  | -0.838467000 |
| 6 | -1.075200000 | 2.194117000  | 0.374032000  |
| 6 | 0.034219000  | 2.958463000  | -0.325808000 |
| 7 | -1.133080000 | 0.832172000  | -0.151435000 |
| 7 | 1.242506000  | 0.852071000  | -0.423014000 |
| 6 | -2.245296000 | 0.024554000  | -0.038004000 |
| 6 | -2.260599000 | -1.226445000 | -0.668203000 |
| 6 | -3.369120000 | 0.418939000  | 0.694181000  |
| 6 | -3.362533000 | -2.049064000 | -0.561076000 |
| 1 | -1.399667000 | -1.531476000 | -1.254911000 |
| 6 | -4.465276000 | -0.419088000 | 0.788912000  |
| 1 | -3.381219000 | 1.370281000  | 1.211001000  |
| 6 | -4.477176000 | -1.656471000 | 0.166275000  |
| 1 | -3.352361000 | -3.012108000 | -1.059394000 |
| 1 | -5.323114000 | -0.096545000 | 1.368541000  |
| 1 | -5.339942000 | -2.305990000 | 0.246546000  |
| 6 | 2.259866000  | -0.044805000 | -0.132059000 |
| 6 | 2.013999000  | -1.420733000 | -0.184518000 |
| 6 | 3.544352000  | 0.395950000  | 0.195138000  |
| 6 | 3.019176000  | -2.320293000 | 0.101432000  |
| 1 | 1.020237000  | -1.768808000 | -0.449164000 |
| 6 | 4.541716000  | -0.520449000 | 0.478130000  |
| 1 | 3.768731000  | 1.454614000  | 0.229366000  |
| 6 | 4.292821000  | -1.881668000 | 0.436264000  |
| 1 | 2.804834000  | -3.382382000 | 0.061180000  |
| 1 | 5.531087000  | -0.158146000 | 0.734212000  |
| 1 | 5.079686000  | -2.592532000 | 0.656180000  |
| 1 | -0.900337000 | 2.169022000  | 1.459181000  |
| 1 | -2.034170000 | 2.692830000  | 0.207186000  |

|   |              |             |              |
|---|--------------|-------------|--------------|
| 1 | 0.090126000  | 3.970130000 | 0.079982000  |
| 1 | -0.214471000 | 3.050110000 | -1.386693000 |
| 1 | 2.123450000  | 2.738512000 | -0.840163000 |
| 1 | 1.752150000  | 2.412461000 | 0.856708000  |

**III-S (TE = -954.860199)**

|   |              |              |              |
|---|--------------|--------------|--------------|
| 6 | 1.250636000  | 1.463475000  | -0.337664000 |
| 7 | 1.138078000  | 0.075452000  | -0.080186000 |
| 6 | -0.018483000 | -0.615498000 | 0.015055000  |
| 7 | -1.158355000 | 0.115223000  | -0.028958000 |
| 6 | -1.261821000 | 1.522833000  | -0.073827000 |
| 6 | 0.044751000  | 2.268945000  | 0.070437000  |
| 8 | 2.252826000  | 1.949884000  | -0.775975000 |
| 6 | 0.217534000  | 2.515727000  | 1.585637000  |
| 1 | -0.619067000 | 3.116046000  | 1.946243000  |
| 1 | 0.251196000  | 1.583451000  | 2.153484000  |
| 1 | 1.146152000  | 3.063912000  | 1.756252000  |
| 6 | -0.004915000 | 3.593225000  | -0.667519000 |
| 1 | -0.110278000 | 3.444815000  | -1.743280000 |
| 1 | -0.852483000 | 4.179301000  | -0.315739000 |
| 1 | 0.914607000  | 4.149111000  | -0.489674000 |
| 6 | 2.357642000  | -0.690616000 | -0.073110000 |
| 6 | 3.354698000  | -0.362224000 | 0.828080000  |
| 6 | 4.518219000  | -1.108873000 | 0.858788000  |
| 6 | 4.680749000  | -2.178307000 | -0.007327000 |
| 6 | 3.675944000  | -2.500168000 | -0.904186000 |
| 6 | 2.510435000  | -1.754370000 | -0.941039000 |
| 1 | 3.214211000  | 0.474133000  | 1.504975000  |
| 1 | 5.299288000  | -0.856895000 | 1.566063000  |
| 1 | 5.592570000  | -2.763041000 | 0.018867000  |
| 1 | 3.798638000  | -3.336479000 | -1.581999000 |
| 1 | 1.708391000  | -1.997278000 | -1.627513000 |
| 6 | -2.390312000 | -0.634842000 | 0.017763000  |
| 6 | -2.643067000 | -1.439341000 | 1.112569000  |
| 6 | -3.810291000 | -2.181125000 | 1.159205000  |
| 6 | -4.718455000 | -2.112848000 | 0.115812000  |
| 6 | -4.455512000 | -1.304078000 | -0.977573000 |
| 6 | -3.288891000 | -0.562005000 | -1.030631000 |
| 1 | -1.913979000 | -1.488763000 | 1.912913000  |
| 1 | -4.009492000 | -2.815231000 | 2.014860000  |



|   |              |              |              |
|---|--------------|--------------|--------------|
| 1 | -5.632514000 | -2.693532000 | 0.153271000  |
| 1 | -5.161040000 | -1.251822000 | -1.798170000 |
| 1 | -3.073830000 | 0.071585000  | -1.882424000 |
| 8 | -2.318274000 | 2.083428000  | -0.139894000 |

**III-T (TE = -954.790481)**

|   |              |              |              |
|---|--------------|--------------|--------------|
| 6 | 1.317914000  | 1.623336000  | -0.192466000 |
| 7 | 1.211670000  | 0.286499000  | 0.189957000  |
| 6 | -0.002166000 | -0.118840000 | 0.667061000  |
| 7 | -1.194731000 | 0.358306000  | 0.183152000  |
| 6 | -1.230386000 | 1.716278000  | -0.134167000 |
| 6 | 0.081504000  | 2.451927000  | 0.160403000  |
| 8 | 2.289986000  | 2.074230000  | -0.743137000 |
| 6 | 0.123124000  | 2.748825000  | 1.670525000  |
| 1 | -0.735970000 | 3.366568000  | 1.939198000  |
| 1 | 0.102914000  | 1.842459000  | 2.278201000  |
| 1 | 1.033612000  | 3.304277000  | 1.903997000  |
| 6 | 0.111599000  | 3.757084000  | -0.609726000 |
| 1 | 0.078852000  | 3.586865000  | -1.686284000 |
| 1 | -0.746555000 | 4.368489000  | -0.333902000 |
| 1 | 1.027709000  | 4.299280000  | -0.378331000 |
| 6 | 2.239314000  | -0.685086000 | 0.009391000  |
| 6 | 3.575410000  | -0.364932000 | 0.200328000  |
| 6 | 4.535265000  | -1.349087000 | 0.046675000  |
| 6 | 4.174064000  | -2.645371000 | -0.282242000 |
| 6 | 2.837015000  | -2.959335000 | -0.459925000 |
| 6 | 1.868933000  | -1.982872000 | -0.316713000 |
| 1 | 3.857949000  | 0.645172000  | 0.460784000  |
| 1 | 5.579017000  | -1.097408000 | 0.192858000  |
| 1 | 4.933092000  | -3.409665000 | -0.397571000 |
| 1 | 2.542479000  | -3.969742000 | -0.717317000 |
| 1 | 0.818750000  | -2.218233000 | -0.462889000 |
| 6 | -2.287772000 | -0.551310000 | 0.093095000  |
| 6 | -2.203055000 | -1.730687000 | 0.827361000  |
| 6 | -3.209630000 | -2.673770000 | 0.747413000  |
| 6 | -4.313518000 | -2.448080000 | -0.056950000 |
| 6 | -4.395050000 | -1.271798000 | -0.781773000 |
| 6 | -3.392061000 | -0.319718000 | -0.717238000 |
| 1 | -1.346945000 | -1.898278000 | 1.474006000  |
| 1 | -3.130763000 | -3.586494000 | 1.325969000  |

|   |              |              |              |
|---|--------------|--------------|--------------|
| 1 | -5.105922000 | -3.184216000 | -0.117130000 |
| 1 | -5.251624000 | -1.086659000 | -1.419326000 |
| 1 | -3.461505000 | 0.591374000  | -1.290348000 |
| 8 | -2.202072000 | 2.269919000  | -0.583112000 |

**IV-S (TE = -599.083898)**

|   |              |              |              |
|---|--------------|--------------|--------------|
| 6 | -0.834585000 | 1.167201000  | 0.341199000  |
| 6 | -2.293293000 | 0.876531000  | 0.002692000  |
| 6 | -2.379777000 | -0.637795000 | -0.265835000 |
| 6 | -0.961484000 | -1.104996000 | -0.493753000 |
| 7 | -0.188744000 | -0.103925000 | -0.170043000 |
| 1 | -2.574729000 | 1.427875000  | -0.899825000 |
| 1 | -2.963780000 | 1.202257000  | 0.802694000  |
| 6 | 1.236861000  | -0.235451000 | -0.150921000 |
| 6 | 2.004567000  | 0.269970000  | -1.186767000 |
| 6 | 3.381242000  | 0.125557000  | -1.154641000 |
| 6 | 3.989454000  | -0.520136000 | -0.091000000 |
| 6 | 3.217058000  | -1.032677000 | 0.938670000  |
| 6 | 1.840981000  | -0.891886000 | 0.909035000  |
| 1 | 1.517347000  | 0.756237000  | -2.023832000 |
| 1 | 3.980518000  | 0.513092000  | -1.970098000 |
| 1 | 5.066926000  | -0.633039000 | -0.069312000 |
| 1 | 3.687244000  | -1.551120000 | 1.765941000  |
| 1 | 1.216659000  | -1.302416000 | 1.695532000  |
| 6 | -3.240019000 | -0.950948000 | -1.478000000 |
| 1 | -3.270742000 | -2.027135000 | -1.660692000 |
| 1 | -4.263354000 | -0.594879000 | -1.322982000 |
| 1 | -2.844966000 | -0.467494000 | -2.375411000 |
| 6 | -2.908332000 | -1.409082000 | 0.941289000  |
| 1 | -3.937926000 | -1.107012000 | 1.154801000  |
| 1 | -2.894467000 | -2.483104000 | 0.744868000  |
| 1 | -2.309401000 | -1.226873000 | 1.837423000  |
| 6 | -0.308045000 | 2.388649000  | -0.383421000 |
| 1 | 0.745924000  | 2.572122000  | -0.162935000 |
| 1 | -0.428939000 | 2.287613000  | -1.464517000 |
| 1 | -0.873016000 | 3.266981000  | -0.061554000 |
| 6 | -0.576639000 | 1.299441000  | 1.831927000  |
| 1 | -1.076535000 | 2.192862000  | 2.213271000  |
| 1 | -0.954721000 | 0.435964000  | 2.383126000  |
| 1 | 0.491234000  | 1.399276000  | 2.040949000  |

**IV-T (TE = -599.015824)**

|   |              |              |              |
|---|--------------|--------------|--------------|
| 6 | -0.889815000 | 1.254200000  | -0.065375000 |
| 6 | -2.334901000 | 0.735235000  | -0.244249000 |
| 6 | -2.353149000 | -0.791062000 | -0.002604000 |
| 6 | -0.940599000 | -1.055786000 | -0.364985000 |
| 7 | -0.091672000 | -0.003278000 | -0.177627000 |
| 1 | -2.655979000 | 0.920864000  | -1.272819000 |
| 1 | -3.025738000 | 1.263219000  | 0.420341000  |
| 6 | 1.276693000  | -0.161782000 | -0.091089000 |
| 6 | 2.183872000  | 0.895215000  | 0.056380000  |
| 6 | 3.541055000  | 0.646346000  | 0.136863000  |
| 6 | 4.043456000  | -0.643607000 | 0.070004000  |
| 6 | 3.151588000  | -1.694932000 | -0.084411000 |
| 6 | 1.794864000  | -1.465213000 | -0.168374000 |
| 1 | 1.840759000  | 1.917889000  | 0.112507000  |
| 1 | 4.218002000  | 1.485388000  | 0.254064000  |
| 1 | 5.109118000  | -0.825918000 | 0.131881000  |
| 1 | 3.518419000  | -2.713723000 | -0.144697000 |
| 1 | 1.104084000  | -2.292831000 | -0.297395000 |
| 6 | -3.354403000 | -1.484997000 | -0.908256000 |
| 1 | -3.318862000 | -2.567704000 | -0.767687000 |
| 1 | -4.370828000 | -1.151048000 | -0.680239000 |
| 1 | -3.145075000 | -1.269946000 | -1.958207000 |
| 6 | -2.655033000 | -1.143197000 | 1.454566000  |
| 1 | -3.658256000 | -0.803020000 | 1.731537000  |
| 1 | -2.610864000 | -2.224784000 | 1.599565000  |
| 1 | -1.937139000 | -0.686889000 | 2.138196000  |
| 6 | -0.567096000 | 2.231511000  | -1.183137000 |
| 1 | 0.412728000  | 2.696507000  | -1.077798000 |
| 1 | -0.606415000 | 1.723817000  | -2.149480000 |
| 1 | -1.314215000 | 3.029736000  | -1.187122000 |
| 6 | -0.710726000 | 1.897116000  | 1.301388000  |
| 1 | -1.355545000 | 2.776960000  | 1.368432000  |
| 1 | -0.991840000 | 1.210761000  | 2.101310000  |
| 1 | 0.314511000  | 2.219375000  | 1.480675000  |

Cartesian coordinates of H<sub>2</sub>, NH<sub>3</sub>, PH<sub>3</sub>, SiH<sub>3</sub>Ph and CH<sub>4</sub>, along with their total energies (in hartrees) including zero point vibrational correction.

H<sub>2</sub> (TE = -1.160836)

|   |             |             |              |
|---|-------------|-------------|--------------|
| 1 | 0.000000000 | 0.000000000 | 0.373457000  |
| 1 | 0.000000000 | 0.000000000 | -0.373457000 |

NH<sub>3</sub> (TE = -56.509166)

|   |              |              |              |
|---|--------------|--------------|--------------|
| 7 | 0.000000000  | 0.000000000  | 0.114416000  |
| 1 | 0.000000000  | 0.938276000  | -0.266971000 |
| 1 | -0.812571000 | -0.469138000 | -0.266971000 |
| 1 | 0.812571000  | -0.469138000 | -0.266971000 |

PH<sub>3</sub> (TE = -343.109705)

|    |              |              |              |
|----|--------------|--------------|--------------|
| 15 | 0.000000000  | 0.000000000  | 0.127733000  |
| 1  | 0.000000000  | 1.192412000  | -0.638667000 |
| 1  | -1.032659000 | -0.596206000 | -0.638667000 |
| 1  | 1.032659000  | -0.596206000 | -0.638667000 |

SiH<sub>3</sub>Ph (TE = -522.717016)

|    |              |              |              |
|----|--------------|--------------|--------------|
| 14 | -2.328705000 | 0.000028000  | 0.005195000  |
| 1  | -2.827744000 | -1.206911000 | -0.687965000 |
| 1  | -2.827241000 | 1.215800000  | -0.672689000 |
| 1  | -2.852591000 | -0.008933000 | 1.389066000  |
| 6  | -0.463638000 | 0.000151000  | -0.011617000 |
| 6  | 0.252990000  | -1.195725000 | -0.008920000 |
| 6  | 0.253174000  | 1.195836000  | -0.008928000 |
| 6  | 1.637548000  | -1.199060000 | 0.002968000  |
| 1  | -0.279062000 | -2.142875000 | -0.021232000 |
| 6  | 1.637806000  | 1.198902000  | 0.002967000  |
| 1  | -0.278692000 | 2.143071000  | -0.021199000 |
| 6  | 2.331460000  | -0.000115000 | 0.009960000  |
| 1  | 2.177675000  | -2.138948000 | 0.003127000  |
| 1  | 2.178055000  | 2.138719000  | 0.003118000  |
| 1  | 3.415438000  | -0.000250000 | 0.016471000  |

CH<sub>4</sub> (TE = -40.448443)

|   |              |              |             |
|---|--------------|--------------|-------------|
| 6 | 0.000000000  | 0.000000000  | 0.000000000 |
| 1 | 0.628315000  | 0.628315000  | 0.628315000 |
| 1 | -0.628315000 | -0.628315000 | 0.628315000 |

|   |              |              |              |
|---|--------------|--------------|--------------|
| 1 | -0.628315000 | 0.628315000  | -0.628315000 |
| 1 | 0.628315000  | -0.628315000 | -0.628315000 |

Cartesian coordinates of the transition states involved in the activation of hydrogen by **1**, **3** and **IV**, along with their total energies (in hartrees) including zero point vibrational correction.

**1TS<sup>H-H</sup>** (TE = -2368.963393)

|    |              |              |              |
|----|--------------|--------------|--------------|
| 6  | -0.443476000 | -1.315068000 | 0.061975000  |
| 6  | -1.172795000 | 0.923036000  | 0.075863000  |
| 7  | -1.488406000 | -0.378794000 | 0.050991000  |
| 7  | 0.734576000  | -0.788354000 | 0.189847000  |
| 25 | 0.828093000  | 1.274196000  | -0.056718000 |
| 6  | 0.667260000  | 0.873412000  | -1.884795000 |
| 8  | 0.541715000  | 0.577332000  | -2.969545000 |
| 6  | 0.818726000  | 3.067139000  | -0.362667000 |
| 8  | 0.875044000  | 4.188863000  | -0.571087000 |
| 6  | 2.678727000  | 1.291157000  | -0.169922000 |
| 8  | 3.810940000  | 1.331060000  | -0.250110000 |
| 6  | 0.852634000  | 1.501360000  | 1.793115000  |
| 8  | 0.844711000  | 1.632085000  | 2.920470000  |
| 6  | 1.863985000  | -1.641975000 | 0.145322000  |
| 6  | 2.823081000  | -1.568920000 | 1.147557000  |
| 6  | 2.032900000  | -2.529822000 | -0.909336000 |
| 6  | 3.942116000  | -2.379266000 | 1.095445000  |
| 1  | 2.681383000  | -0.877653000 | 1.971874000  |
| 6  | 3.159786000  | -3.332534000 | -0.958547000 |
| 1  | 1.270213000  | -2.586072000 | -1.681432000 |
| 6  | 4.116431000  | -3.261255000 | 0.040227000  |
| 1  | 4.682403000  | -2.322260000 | 1.884948000  |
| 1  | 3.288578000  | -4.020767000 | -1.785992000 |
| 1  | 4.995925000  | -3.892786000 | -0.000795000 |
| 6  | -2.830350000 | -0.891789000 | 0.077257000  |
| 6  | -3.246891000 | -1.617815000 | 1.176428000  |
| 6  | -3.663917000 | -0.693868000 | -1.009141000 |
| 6  | -4.527189000 | -2.146552000 | 1.193181000  |
| 1  | -2.566128000 | -1.767928000 | 2.006599000  |
| 6  | -4.942535000 | -1.217995000 | -0.982643000 |
| 1  | -3.295870000 | -0.148247000 | -1.870373000 |
| 6  | -5.374110000 | -1.943413000 | 0.117404000  |
| 1  | -4.861474000 | -2.718446000 | 2.050338000  |

|   |              |              |              |
|---|--------------|--------------|--------------|
| 1 | -5.599851000 | -1.073641000 | -1.831473000 |
| 1 | -6.374726000 | -2.359013000 | 0.131243000  |
| 8 | -2.233890000 | 1.669482000  | 0.210810000  |
| 6 | -2.126217000 | 3.083960000  | 0.286277000  |
| 1 | -1.432267000 | 3.378684000  | 1.073955000  |
| 1 | -1.809894000 | 3.494391000  | -0.672408000 |
| 1 | -3.122486000 | 3.447186000  | 0.524962000  |
| 1 | -0.731437000 | -2.261845000 | -0.591117000 |
| 1 | -1.027047000 | -2.365786000 | -1.800555000 |

**3TS<sup>H-H</sup>** (TE = -2555.137412)

|   |              |              |              |
|---|--------------|--------------|--------------|
| 6 | 1.463559000  | 0.671713000  | 0.341698000  |
| 7 | 1.195216000  | -0.701533000 | 0.155455000  |
| 6 | -0.000409000 | -1.309121000 | -0.025595000 |
| 7 | -1.195719000 | -0.700856000 | 0.155311000  |
| 6 | -1.463247000 | 0.672536000  | 0.341643000  |
| 8 | 2.570673000  | 1.008020000  | 0.670274000  |
| 6 | 2.320048000  | -1.596216000 | 0.054686000  |
| 6 | 2.493665000  | -2.595326000 | 0.993618000  |
| 6 | 3.554873000  | -3.473887000 | 0.860943000  |
| 6 | 4.428508000  | -3.351011000 | -0.207421000 |
| 6 | 4.240531000  | -2.351831000 | -1.148499000 |
| 6 | 3.181431000  | -1.471201000 | -1.021212000 |
| 1 | 1.794674000  | -2.677045000 | 1.818350000  |
| 1 | 3.700538000  | -4.256217000 | 1.596187000  |
| 1 | 5.258510000  | -4.040153000 | -0.308917000 |
| 1 | 4.917106000  | -2.261456000 | -1.989709000 |
| 1 | 3.012700000  | -0.686857000 | -1.751425000 |
| 6 | -2.320994000 | -1.594982000 | 0.054605000  |
| 6 | -2.494914000 | -2.594096000 | 0.993480000  |
| 6 | -3.556536000 | -3.472172000 | 0.860915000  |
| 6 | -4.430286000 | -3.348823000 | -0.207298000 |
| 6 | -4.242014000 | -2.349648000 | -1.148324000 |
| 6 | -3.182500000 | -1.469500000 | -1.021144000 |
| 1 | -1.795812000 | -2.676208000 | 1.818079000  |
| 1 | -3.702427000 | -4.254497000 | 1.596120000  |
| 1 | -5.260605000 | -4.037593000 | -0.308722000 |
| 1 | -4.918679000 | -2.258912000 | -1.989423000 |
| 1 | -3.013539000 | -0.685187000 | -1.751332000 |
| 8 | -2.570137000 | 1.009487000  | 0.670318000  |

|    |              |              |              |
|----|--------------|--------------|--------------|
| 26 | 0.000548000  | 2.019817000  | 0.013827000  |
| 6  | 0.000561000  | 1.439325000  | -1.725320000 |
| 8  | 0.000614000  | 1.071499000  | -2.793588000 |
| 6  | 0.000512000  | 2.137746000  | 1.841574000  |
| 8  | 0.000484000  | 2.165085000  | 2.970604000  |
| 6  | 1.363378000  | 3.268266000  | -0.251630000 |
| 8  | 2.193332000  | 4.014032000  | -0.410188000 |
| 6  | -1.361596000 | 3.268979000  | -0.251902000 |
| 8  | -2.191145000 | 4.015146000  | -0.410689000 |
| 1  | -0.000555000 | -1.875726000 | -1.952728000 |
| 1  | -0.000622000 | -2.139327000 | -0.894094000 |

**IVTS<sup>H-H</sup> (TE = -600.210632)**

|   |              |              |              |
|---|--------------|--------------|--------------|
| 6 | -0.845676000 | 1.214313000  | 0.348005000  |
| 6 | -2.310395000 | 0.854412000  | 0.056643000  |
| 6 | -2.353989000 | -0.657975000 | -0.216142000 |
| 6 | -0.937440000 | -0.976954000 | -0.601787000 |
| 7 | -0.153599000 | -0.033100000 | -0.100821000 |
| 1 | -2.641267000 | 1.382850000  | -0.842618000 |
| 1 | -2.968235000 | 1.154854000  | 0.877207000  |
| 6 | 1.259831000  | -0.183050000 | -0.097220000 |
| 6 | 2.035766000  | 0.370825000  | -1.105311000 |
| 6 | 3.409068000  | 0.189270000  | -1.091267000 |
| 6 | 4.005742000  | -0.542415000 | -0.078486000 |
| 6 | 3.227335000  | -1.104714000 | 0.921322000  |
| 6 | 1.855803000  | -0.928245000 | 0.910146000  |
| 1 | 1.558118000  | 0.923302000  | -1.905510000 |
| 1 | 4.014723000  | 0.617490000  | -1.881275000 |
| 1 | 5.080488000  | -0.680909000 | -0.071011000 |
| 1 | 3.690621000  | -1.684675000 | 1.710803000  |
| 1 | 1.224203000  | -1.366688000 | 1.676284000  |
| 6 | -3.393337000 | -1.045614000 | -1.247496000 |
| 1 | -3.309720000 | -2.106781000 | -1.496618000 |
| 1 | -4.398470000 | -0.871312000 | -0.853354000 |
| 1 | -3.273825000 | -0.472330000 | -2.168154000 |
| 6 | -2.622579000 | -1.446347000 | 1.071044000  |
| 1 | -3.598176000 | -1.167878000 | 1.478915000  |
| 1 | -2.625712000 | -2.519778000 | 0.869536000  |
| 1 | -1.865720000 | -1.252726000 | 1.834700000  |
| 6 | -0.402304000 | 2.404416000  | -0.481519000 |

|   |              |              |              |
|---|--------------|--------------|--------------|
| 1 | 0.636747000  | 2.675481000  | -0.280786000 |
| 1 | -0.516040000 | 2.193266000  | -1.548644000 |
| 1 | -1.027418000 | 3.267973000  | -0.240818000 |
| 6 | -0.560219000 | 1.465585000  | 1.816682000  |
| 1 | -1.067634000 | 2.375456000  | 2.144874000  |
| 1 | -0.905432000 | 0.639012000  | 2.441308000  |
| 1 | 0.511273000  | 1.599781000  | 1.986548000  |
| 1 | -0.703789000 | -1.401803000 | -1.714481000 |
| 1 | -0.945183000 | -0.753933000 | -2.538839000 |

Cartesian coordinates of the transition states and the intermediates involved in the activation of N – H bond of NH<sub>3</sub> by **1**, **3** and **III-IV**, along with their total energies (in hartrees) including zero point vibrational correction.

**1TS<sub>Nu</sub><sup>N-H</sup>** (TE = -2424.312253)

|    |              |              |              |
|----|--------------|--------------|--------------|
| 6  | -0.413034000 | -1.176214000 | 0.080321000  |
| 6  | -1.099190000 | 1.057157000  | 0.173674000  |
| 7  | -1.446512000 | -0.236718000 | 0.118290000  |
| 7  | 0.780866000  | -0.677323000 | 0.084565000  |
| 25 | 0.909693000  | 1.373223000  | -0.009537000 |
| 6  | 0.629650000  | 1.220543000  | -1.855847000 |
| 8  | 0.421484000  | 1.090979000  | -2.961589000 |
| 6  | 0.960799000  | 3.191944000  | -0.088091000 |
| 8  | 1.061555000  | 4.327860000  | -0.151225000 |
| 6  | 2.754864000  | 1.342898000  | -0.184520000 |
| 8  | 3.886213000  | 1.345791000  | -0.281992000 |
| 6  | 1.021425000  | 1.351835000  | 1.857041000  |
| 8  | 1.061988000  | 1.300695000  | 2.988701000  |
| 6  | 1.858965000  | -1.593383000 | 0.121994000  |
| 6  | 2.108329000  | -2.320931000 | 1.277456000  |
| 6  | 2.674429000  | -1.761855000 | -0.988904000 |
| 6  | 3.168996000  | -3.209132000 | 1.321584000  |
| 1  | 1.461636000  | -2.176805000 | 2.136769000  |
| 6  | 3.731846000  | -2.652233000 | -0.940715000 |
| 1  | 2.464801000  | -1.200650000 | -1.893801000 |
| 6  | 3.983559000  | -3.375795000 | 0.214083000  |
| 1  | 3.359645000  | -3.773338000 | 2.227042000  |
| 1  | 4.359325000  | -2.786565000 | -1.813862000 |
| 1  | 4.813678000  | -4.071110000 | 0.249134000  |
| 6  | -2.800324000 | -0.720169000 | 0.142729000  |



|   |              |              |              |
|---|--------------|--------------|--------------|
| 6 | -3.208896000 | -1.518853000 | 1.193036000  |
| 6 | -3.655687000 | -0.418516000 | -0.901878000 |
| 6 | -4.499462000 | -2.021341000 | 1.199335000  |
| 1 | -2.513991000 | -1.749242000 | 1.992467000  |
| 6 | -4.943162000 | -0.919630000 | -0.886923000 |
| 1 | -3.300418000 | 0.190440000  | -1.725783000 |
| 6 | -5.365722000 | -1.720416000 | 0.163174000  |
| 1 | -4.825465000 | -2.652921000 | 2.016748000  |
| 1 | -5.616145000 | -0.695538000 | -1.705627000 |
| 1 | -6.373633000 | -2.117804000 | 0.167815000  |
| 8 | -2.141411000 | 1.824845000  | 0.339838000  |
| 6 | -1.994007000 | 3.231170000  | 0.470269000  |
| 1 | -1.313987000 | 3.472882000  | 1.287700000  |
| 1 | -1.638694000 | 3.667922000  | -0.463008000 |
| 1 | -2.985164000 | 3.616025000  | 0.695906000  |
| 1 | -0.712369000 | -2.206968000 | -0.256778000 |
| 7 | -1.032570000 | -2.588383000 | -1.869519000 |
| 1 | -0.147085000 | -2.420629000 | -2.353977000 |
| 1 | -1.685835000 | -1.953130000 | -2.332456000 |

**3TS<sub>Nu</sub><sup>N-H</sup> (TE = -2610.484624)**

|   |              |              |              |
|---|--------------|--------------|--------------|
| 6 | 1.457988000  | 0.766329000  | 0.357949000  |
| 7 | 1.198030000  | -0.609554000 | 0.170365000  |
| 6 | 0.000585000  | -1.210788000 | -0.000610000 |
| 7 | -1.197427000 | -0.610713000 | 0.170460000  |
| 6 | -1.458611000 | 0.764904000  | 0.358329000  |
| 8 | 2.561521000  | 1.106813000  | 0.694097000  |
| 6 | 2.324188000  | -1.511796000 | 0.155423000  |
| 6 | 2.407501000  | -2.510911000 | 1.105894000  |
| 6 | 3.465952000  | -3.402116000 | 1.064528000  |
| 6 | 4.430458000  | -3.287124000 | 0.078318000  |
| 6 | 4.336957000  | -2.281874000 | -0.871361000 |
| 6 | 3.281032000  | -1.390634000 | -0.836117000 |
| 1 | 1.639459000  | -2.588098000 | 1.867616000  |
| 1 | 3.535519000  | -4.188650000 | 1.806225000  |
| 1 | 5.257509000  | -3.986284000 | 0.045856000  |
| 1 | 5.086244000  | -2.196363000 | -1.649008000 |
| 1 | 3.189037000  | -0.604366000 | -1.577881000 |
| 6 | -2.322724000 | -1.514022000 | 0.155484000  |
| 6 | -2.404649000 | -2.513760000 | 1.105425000  |

|    |              |              |              |
|----|--------------|--------------|--------------|
| 6  | -3.462241000 | -3.405980000 | 1.064024000  |
| 6  | -4.427298000 | -3.291377000 | 0.078310000  |
| 6  | -4.335183000 | -2.285516000 | -0.870856000 |
| 6  | -3.280111000 | -1.393266000 | -0.835587000 |
| 1  | -1.636201000 | -2.590629000 | 1.866767000  |
| 1  | -3.530706000 | -4.192997000 | 1.805310000  |
| 1  | -5.253686000 | -3.991320000 | 0.045824000  |
| 1  | -5.084886000 | -2.200307000 | -1.648135000 |
| 1  | -3.189191000 | -0.606540000 | -1.576997000 |
| 8  | -2.562330000 | 1.104313000  | 0.694953000  |
| 26 | -0.001014000 | 2.112583000  | 0.018757000  |
| 6  | -0.000919000 | 1.523423000  | -1.712810000 |
| 8  | -0.000861000 | 1.140132000  | -2.775952000 |
| 6  | -0.000861000 | 2.250829000  | 1.848312000  |
| 8  | -0.000745000 | 2.289073000  | 2.976421000  |
| 6  | 1.362802000  | 3.361096000  | -0.253452000 |
| 8  | 2.193260000  | 4.104664000  | -0.417052000 |
| 6  | -1.366130000 | 3.359728000  | -0.253165000 |
| 8  | -2.197373000 | 4.102453000  | -0.416609000 |
| 1  | 0.001040000  | -2.200988000 | -0.573798000 |
| 7  | 0.000950000  | -2.327448000 | -2.107427000 |
| 1  | 0.807688000  | -1.844042000 | -2.504302000 |
| 1  | -0.806520000 | -1.845034000 | -2.504029000 |

**IIITS<sub>Nu</sub><sup>N-H</sup> (TE = -1011.335086)**

|   |              |              |              |
|---|--------------|--------------|--------------|
| 6 | 1.263064000  | 1.608772000  | -0.410036000 |
| 7 | 1.172399000  | 0.224575000  | -0.212226000 |
| 6 | 0.000036000  | -0.430496000 | -0.035777000 |
| 7 | -1.172374000 | 0.224499000  | -0.212197000 |
| 6 | -1.263149000 | 1.608684000  | -0.410027000 |
| 6 | -0.000071000 | 2.373141000  | -0.074539000 |
| 8 | 2.284259000  | 2.134001000  | -0.756015000 |
| 6 | -0.000057000 | 2.531266000  | 1.460995000  |
| 1 | -0.887100000 | 3.090386000  | 1.765436000  |
| 1 | 0.000070000  | 1.566910000  | 1.976643000  |
| 1 | 0.886861000  | 3.090603000  | 1.765393000  |
| 6 | -0.000123000 | 3.732075000  | -0.742968000 |
| 1 | -0.000163000 | 3.640880000  | -1.829932000 |
| 1 | -0.888143000 | 4.288816000  | -0.446914000 |
| 1 | 0.887898000  | 4.288850000  | -0.446982000 |

|   |              |              |              |
|---|--------------|--------------|--------------|
| 6 | 2.369700000  | -0.565089000 | -0.164717000 |
| 6 | 3.342746000  | -0.263818000 | 0.772193000  |
| 6 | 4.477109000  | -1.050032000 | 0.846215000  |
| 6 | 4.631068000  | -2.131171000 | -0.007378000 |
| 6 | 3.648903000  | -2.427217000 | -0.937077000 |
| 6 | 2.512879000  | -1.640961000 | -1.020216000 |
| 1 | 3.202440000  | 0.579427000  | 1.440207000  |
| 1 | 5.241066000  | -0.822098000 | 1.579495000  |
| 1 | 5.519971000  | -2.747300000 | 0.055713000  |
| 1 | 3.766760000  | -3.272592000 | -1.604016000 |
| 1 | 1.733291000  | -1.857100000 | -1.741862000 |
| 6 | -2.369632000 | -0.565212000 | -0.164706000 |
| 6 | -3.342792000 | -0.263776000 | 0.772027000  |
| 6 | -4.477165000 | -1.049970000 | 0.846048000  |
| 6 | -4.631013000 | -2.131255000 | -0.007386000 |
| 6 | -3.648722000 | -2.427476000 | -0.936895000 |
| 6 | -2.512682000 | -1.641241000 | -1.020025000 |
| 1 | -3.202538000 | 0.579630000  | 1.439858000  |
| 1 | -5.241226000 | -0.821901000 | 1.579178000  |
| 1 | -5.519933000 | -2.747363000 | 0.055683000  |
| 1 | -3.766499000 | -3.272966000 | -1.603704000 |
| 1 | -1.733001000 | -1.857505000 | -1.741536000 |
| 8 | -2.284394000 | 2.133808000  | -0.756013000 |
| 1 | 0.000055000  | -1.393759000 | 0.590834000  |
| 7 | 0.000055000  | -1.359632000 | 2.103541000  |
| 1 | 0.810331000  | -0.849430000 | 2.457264000  |
| 1 | -0.810216000 | -0.849415000 | 2.457253000  |

**IVTS<sub>Nu</sub><sup>N-H</sup> (TE = -655.559058)**

|   |              |              |              |
|---|--------------|--------------|--------------|
| 6 | -0.766491000 | 1.319131000  | -0.570683000 |
| 6 | -2.244444000 | 0.916049000  | -0.498115000 |
| 6 | -2.330552000 | -0.312146000 | 0.421317000  |
| 6 | -0.932541000 | -0.846016000 | 0.398681000  |
| 7 | -0.111945000 | 0.092015000  | -0.019646000 |
| 1 | -2.591066000 | 0.636411000  | -1.497426000 |
| 1 | -2.869932000 | 1.743240000  | -0.152481000 |
| 6 | 1.300526000  | -0.048255000 | 0.101010000  |
| 6 | 2.089736000  | -0.323000000 | -1.004989000 |
| 6 | 3.457583000  | -0.468269000 | -0.848833000 |
| 6 | 4.034400000  | -0.342655000 | 0.403736000  |

|   |              |              |              |
|---|--------------|--------------|--------------|
| 6 | 3.241013000  | -0.079387000 | 1.508838000  |
| 6 | 1.874155000  | 0.066186000  | 1.358510000  |
| 1 | 1.629328000  | -0.446743000 | -1.977611000 |
| 1 | 4.073911000  | -0.693058000 | -1.711017000 |
| 1 | 5.105168000  | -0.459792000 | 0.520885000  |
| 1 | 3.687707000  | 0.009891000  | 2.491876000  |
| 1 | 1.231307000  | 0.265423000  | 2.210060000  |
| 6 | -3.387172000 | -1.302759000 | -0.024806000 |
| 1 | -3.354257000 | -2.208324000 | 0.585465000  |
| 1 | -4.381299000 | -0.858818000 | 0.077727000  |
| 1 | -3.242905000 | -1.589995000 | -1.067313000 |
| 6 | -2.606257000 | 0.086409000  | 1.876195000  |
| 1 | -3.576647000 | 0.585930000  | 1.942725000  |
| 1 | -2.628332000 | -0.796794000 | 2.517946000  |
| 1 | -1.845609000 | 0.765532000  | 2.268316000  |
| 6 | -0.335623000 | 1.565422000  | -2.003810000 |
| 1 | 0.715636000  | 1.853556000  | -2.070395000 |
| 1 | -0.500018000 | 0.673123000  | -2.613842000 |
| 1 | -0.932338000 | 2.378923000  | -2.423441000 |
| 6 | -0.418546000 | 2.518509000  | 0.291660000  |
| 1 | -0.905778000 | 3.411332000  | -0.105890000 |
| 1 | -0.746094000 | 2.383617000  | 1.324388000  |
| 1 | 0.659524000  | 2.697287000  | 0.293937000  |
| 1 | -0.637408000 | -1.962459000 | 0.342914000  |
| 7 | -0.617569000 | -2.871499000 | -0.902983000 |
| 1 | -1.543768000 | -3.020352000 | -1.302925000 |
| 1 | -0.095252000 | -2.406852000 | -1.647739000 |

**3TS<sub>1</sub><sup>N-H</sup> (TE = -2610.501350)**

|   |              |              |              |
|---|--------------|--------------|--------------|
| 6 | -1.476501000 | 0.762323000  | -0.136100000 |
| 7 | -1.225358000 | -0.593711000 | 0.015304000  |
| 6 | -0.038420000 | -1.298943000 | 0.236209000  |
| 7 | 1.181708000  | -0.661920000 | -0.009501000 |
| 6 | 1.496620000  | 0.672025000  | -0.218829000 |
| 8 | -2.590935000 | 1.161648000  | -0.380466000 |
| 6 | -2.370414000 | -1.467132000 | -0.053424000 |
| 6 | -2.458367000 | -2.396653000 | -1.075668000 |
| 6 | -3.534717000 | -3.262247000 | -1.127725000 |
| 6 | -4.522501000 | -3.206887000 | -0.155309000 |
| 6 | -4.430506000 | -2.277667000 | 0.866349000  |

|    |              |              |              |
|----|--------------|--------------|--------------|
| 6  | -3.355635000 | -1.404210000 | 0.917122000  |
| 1  | -1.665175000 | -2.439070000 | -1.813246000 |
| 1  | -3.603006000 | -3.987009000 | -1.930663000 |
| 1  | -5.363780000 | -3.888703000 | -0.195588000 |
| 1  | -5.199643000 | -2.227806000 | 1.628273000  |
| 1  | -3.282867000 | -0.660902000 | 1.704602000  |
| 6  | 2.281201000  | -1.591778000 | -0.066999000 |
| 6  | 2.308645000  | -2.565449000 | -1.050458000 |
| 6  | 3.345777000  | -3.478973000 | -1.083639000 |
| 6  | 4.352981000  | -3.427403000 | -0.131144000 |
| 6  | 4.320028000  | -2.454731000 | 0.853185000  |
| 6  | 3.284906000  | -1.534073000 | 0.885052000  |
| 1  | 1.500494000  | -2.603617000 | -1.771722000 |
| 1  | 3.368186000  | -4.238226000 | -1.856718000 |
| 1  | 5.163113000  | -4.146598000 | -0.157339000 |
| 1  | 5.103911000  | -2.408346000 | 1.600132000  |
| 1  | 3.256127000  | -0.757505000 | 1.643152000  |
| 8  | 2.614166000  | 1.000362000  | -0.543263000 |
| 26 | 0.055346000  | 2.098556000  | -0.072036000 |
| 6  | 0.106712000  | 1.763020000  | 1.694887000  |
| 8  | 0.143506000  | 1.500136000  | 2.802129000  |
| 6  | -0.006430000 | 1.827638000  | -1.880641000 |
| 8  | -0.044815000 | 1.604747000  | -2.989224000 |
| 6  | -1.254113000 | 3.423946000  | 0.002249000  |
| 8  | -2.042748000 | 4.228918000  | 0.054346000  |
| 6  | 1.444975000  | 3.341204000  | -0.084283000 |
| 8  | 2.283092000  | 4.096348000  | -0.084439000 |
| 7  | -0.027293000 | -1.534568000 | 2.076810000  |
| 1  | -0.862302000 | -2.081058000 | 2.259187000  |
| 1  | 0.777240000  | -2.129085000 | 2.245686000  |
| 1  | 0.001715000  | -0.744483000 | 2.721199000  |

**3Int<sup>N-H</sup>** (TE = -2610.501534)

|   |              |              |              |
|---|--------------|--------------|--------------|
| 6 | -1.501889000 | 0.715870000  | -0.165162000 |
| 7 | -1.222148000 | -0.605338000 | 0.102662000  |
| 6 | 0.000058000  | -1.226670000 | 0.462315000  |
| 7 | 1.222255000  | -0.605231000 | 0.102940000  |
| 6 | 1.501916000  | 0.716007000  | -0.164865000 |
| 8 | -2.597635000 | 1.067523000  | -0.543389000 |
| 6 | -2.315461000 | -1.533807000 | -0.009742000 |

|    |              |              |              |
|----|--------------|--------------|--------------|
| 6  | -2.285301000 | -2.525821000 | -0.976952000 |
| 6  | -3.322169000 | -3.435136000 | -1.062168000 |
| 6  | -4.389493000 | -3.364833000 | -0.177236000 |
| 6  | -4.415940000 | -2.375716000 | 0.789712000  |
| 6  | -3.380544000 | -1.457575000 | 0.872707000  |
| 1  | -1.433683000 | -2.577283000 | -1.645397000 |
| 1  | -3.298982000 | -4.205911000 | -1.823857000 |
| 1  | -5.199154000 | -4.081883000 | -0.244405000 |
| 1  | -5.246884000 | -2.312989000 | 1.482725000  |
| 1  | -3.399869000 | -0.665432000 | 1.614402000  |
| 6  | 2.315665000  | -1.533649000 | -0.009606000 |
| 6  | 2.285436000  | -2.525616000 | -0.976850000 |
| 6  | 3.322357000  | -3.434863000 | -1.062194000 |
| 6  | 4.389760000  | -3.364534000 | -0.177354000 |
| 6  | 4.416244000  | -2.375460000 | 0.789630000  |
| 6  | 3.380813000  | -1.457374000 | 0.872755000  |
| 1  | 1.433744000  | -2.577123000 | -1.645195000 |
| 1  | 3.299165000  | -4.205605000 | -1.823917000 |
| 1  | 5.199426000  | -4.081569000 | -0.244638000 |
| 1  | 5.247244000  | -2.312722000 | 1.482578000  |
| 1  | 3.400126000  | -0.665256000 | 1.614463000  |
| 8  | 2.597683000  | 1.067741000  | -0.542970000 |
| 26 | -0.000043000 | 2.108480000  | -0.078236000 |
| 6  | -0.000377000 | 1.824039000  | 1.687139000  |
| 8  | -0.000796000 | 1.582108000  | 2.803118000  |
| 6  | 0.000160000  | 1.771274000  | -1.879266000 |
| 8  | 0.000155000  | 1.510896000  | -2.980411000 |
| 6  | -1.354021000 | 3.383789000  | -0.085235000 |
| 8  | -2.174778000 | 4.158572000  | -0.077708000 |
| 6  | 1.353891000  | 3.383839000  | -0.084745000 |
| 8  | 2.174613000  | 4.158654000  | -0.076891000 |
| 7  | -0.000125000 | -1.386289000 | 2.023959000  |
| 1  | -0.818917000 | -1.941219000 | 2.267412000  |
| 1  | 0.818715000  | -1.941078000 | 2.267547000  |
| 1  | -0.000258000 | -0.540922000 | 2.614199000  |

**3TS<sub>2</sub><sup>N-H</sup> (TE = -2610.483132)**

|   |             |              |             |
|---|-------------|--------------|-------------|
| 6 | 1.457708000 | 0.760359000  | 0.374268000 |
| 7 | 1.194222000 | -0.625133000 | 0.247095000 |
| 6 | 0.003113000 | -1.236490000 | 0.109264000 |

|    |              |              |              |
|----|--------------|--------------|--------------|
| 7  | -1.190911000 | -0.630887000 | 0.247083000  |
| 6  | -1.460964000 | 0.753371000  | 0.375056000  |
| 8  | 2.570997000  | 1.106455000  | 0.668762000  |
| 6  | 2.329793000  | -1.513443000 | 0.187224000  |
| 6  | 2.514653000  | -2.457756000 | 1.177923000  |
| 6  | 3.584886000  | -3.332876000 | 1.091003000  |
| 6  | 4.458269000  | -3.255326000 | 0.019759000  |
| 6  | 4.260780000  | -2.305733000 | -0.971132000 |
| 6  | 3.193483000  | -1.431254000 | -0.890315000 |
| 1  | 1.817504000  | -2.503479000 | 2.007162000  |
| 1  | 3.736123000  | -4.075860000 | 1.864886000  |
| 1  | 5.294984000  | -3.940550000 | -0.046902000 |
| 1  | 4.937686000  | -2.250848000 | -1.815177000 |
| 1  | 3.010162000  | -0.695113000 | -1.665463000 |
| 6  | -2.322370000 | -1.524402000 | 0.187230000  |
| 6  | -2.502521000 | -2.470053000 | 1.177515000  |
| 6  | -3.568869000 | -3.349901000 | 1.090651000  |
| 6  | -4.443116000 | -3.275703000 | 0.019881000  |
| 6  | -4.250379000 | -2.324713000 | -0.970597000 |
| 6  | -3.186973000 | -1.445508000 | -0.889839000 |
| 1  | -1.804788000 | -2.513075000 | 2.006405000  |
| 1  | -3.716427000 | -4.093933000 | 1.864237000  |
| 1  | -5.276808000 | -3.964608000 | -0.046724000 |
| 1  | -4.927972000 | -2.272372000 | -1.814255000 |
| 1  | -3.007566000 | -0.707901000 | -1.664521000 |
| 8  | -2.575719000 | 1.093957000  | 0.670358000  |
| 26 | -0.004939000 | 2.093807000  | 0.021482000  |
| 6  | -0.004691000 | 1.510207000  | -1.727088000 |
| 8  | -0.005202000 | 1.181493000  | -2.805295000 |
| 6  | -0.004711000 | 2.258853000  | 1.843991000  |
| 8  | -0.004523000 | 2.313867000  | 2.972136000  |
| 6  | 1.354647000  | 3.342421000  | -0.269364000 |
| 8  | 2.180416000  | 4.089682000  | -0.440673000 |
| 6  | -1.370481000 | 3.336120000  | -0.268218000 |
| 8  | -2.199806000 | 4.079612000  | -0.438768000 |
| 1  | 0.005521000  | -2.181969000 | -0.570339000 |
| 7  | 0.005946000  | -2.041586000 | -2.095251000 |
| 1  | 0.812284000  | -2.652634000 | -2.242396000 |
| 1  | -0.799947000 | -2.652987000 | -2.243361000 |

**III-TS<sub>1</sub><sup>N-H</sup> (TE = -1011.354162)**

|   |              |              |              |
|---|--------------|--------------|--------------|
| 6 | 1.273178000  | 1.530090000  | -0.356529000 |
| 7 | 1.176179000  | 0.176635000  | -0.108480000 |
| 6 | 0.000000000  | -0.569055000 | 0.096192000  |
| 7 | -1.176179000 | 0.176635000  | -0.108481000 |
| 6 | -1.273179000 | 1.530091000  | -0.356529000 |
| 6 | 0.000000000  | 2.332986000  | -0.157548000 |
| 8 | 2.306624000  | 2.057399000  | -0.698106000 |
| 6 | 0.000000000  | 2.817455000  | 1.300897000  |
| 1 | -0.887884000 | 3.425842000  | 1.484534000  |
| 1 | -0.000003000 | 1.991780000  | 2.015758000  |
| 1 | 0.887886000  | 3.425838000  | 1.484536000  |
| 6 | 0.000000000  | 3.540547000  | -1.080279000 |
| 1 | 0.000001000  | 3.236698000  | -2.128271000 |
| 1 | -0.889184000 | 4.142945000  | -0.900518000 |
| 1 | 0.889183000  | 4.142946000  | -0.900516000 |
| 6 | 2.382212000  | -0.594565000 | -0.104238000 |
| 6 | 3.376761000  | -0.303054000 | 0.815605000  |
| 6 | 4.528307000  | -1.070796000 | 0.853609000  |
| 6 | 4.685389000  | -2.129745000 | -0.024856000 |
| 6 | 3.686002000  | -2.419263000 | -0.941125000 |
| 6 | 2.533381000  | -1.655398000 | -0.980935000 |
| 1 | 3.246068000  | 0.535388000  | 1.492232000  |
| 1 | 5.305219000  | -0.839300000 | 1.572756000  |
| 1 | 5.586808000  | -2.730444000 | 0.004030000  |
| 1 | 3.805617000  | -3.245802000 | -1.631814000 |
| 1 | 1.734237000  | -1.875812000 | -1.678152000 |
| 6 | -2.382212000 | -0.594565000 | -0.104237000 |
| 6 | -3.376759000 | -0.303057000 | 0.815608000  |
| 6 | -4.528305000 | -1.070799000 | 0.853612000  |
| 6 | -4.685389000 | -2.129744000 | -0.024856000 |
| 6 | -3.686004000 | -2.419259000 | -0.941129000 |
| 6 | -2.533383000 | -1.655395000 | -0.980939000 |
| 1 | -3.246064000 | 0.535383000  | 1.492238000  |
| 1 | -5.305215000 | -0.839304000 | 1.572762000  |
| 1 | -5.586808000 | -2.730443000 | 0.004030000  |
| 1 | -3.805622000 | -3.245796000 | -1.631820000 |
| 1 | -1.734240000 | -1.875807000 | -1.678158000 |
| 8 | -2.306624000 | 2.057399000  | -0.698105000 |
| 7 | 0.000000000  | -0.814901000 | 1.901730000  |



|   |              |              |             |
|---|--------------|--------------|-------------|
| 1 | -0.822489000 | -1.377889000 | 2.093329000 |
| 1 | 0.822483000  | -1.377899000 | 2.093326000 |
| 1 | 0.000006000  | -0.004146000 | 2.522089000 |

**III-Int<sup>N-H</sup>** (TE = -1011.353288)

|   |              |              |              |
|---|--------------|--------------|--------------|
| 6 | 1.277573000  | 1.522147000  | -0.342784000 |
| 7 | 1.190466000  | 0.190939000  | -0.016737000 |
| 6 | 0.000016000  | -0.528496000 | 0.294522000  |
| 7 | -1.190377000 | 0.190960000  | -0.016474000 |
| 6 | -1.277653000 | 1.522100000  | -0.342701000 |
| 6 | -0.000073000 | 2.334888000  | -0.177563000 |
| 8 | 2.301326000  | 2.034543000  | -0.741114000 |
| 6 | -0.000081000 | 2.923220000  | 1.240514000  |
| 1 | -0.887594000 | 3.543985000  | 1.380323000  |
| 1 | -0.000328000 | 2.158205000  | 2.020758000  |
| 1 | 0.887610000  | 3.543684000  | 1.380479000  |
| 6 | -0.000179000 | 3.482590000  | -1.175866000 |
| 1 | 0.000224000  | 3.112305000  | -2.202178000 |
| 1 | -0.890035000 | 4.094319000  | -1.035488000 |
| 1 | 0.889181000  | 4.094927000  | -1.035049000 |
| 6 | 2.380548000  | -0.600885000 | -0.057066000 |
| 6 | 3.454578000  | -0.275109000 | 0.756649000  |
| 6 | 4.594251000  | -1.061943000 | 0.746036000  |
| 6 | 4.662438000  | -2.174890000 | -0.074464000 |
| 6 | 3.584639000  | -2.499366000 | -0.884874000 |
| 6 | 2.443861000  | -1.718138000 | -0.875165000 |
| 1 | 3.395795000  | 0.606879000  | 1.385381000  |
| 1 | 5.432214000  | -0.801675000 | 1.382091000  |
| 1 | 5.554369000  | -2.790233000 | -0.083592000 |
| 1 | 3.634026000  | -3.367676000 | -1.531656000 |
| 1 | 1.584995000  | -1.965451000 | -1.487487000 |
| 6 | -2.380483000 | -0.600869000 | -0.056921000 |
| 6 | -3.453813000 | -0.276021000 | 0.758062000  |
| 6 | -4.593563000 | -1.062735000 | 0.747376000  |
| 6 | -4.662452000 | -2.174613000 | -0.074525000 |
| 6 | -3.585353000 | -2.498125000 | -0.886247000 |
| 6 | -2.444494000 | -1.717001000 | -0.876447000 |
| 1 | -3.394383000 | 0.605222000  | 1.387808000  |
| 1 | -5.431019000 | -0.803254000 | 1.384416000  |
| 1 | -5.554434000 | -2.789883000 | -0.083745000 |

|   |              |              |              |
|---|--------------|--------------|--------------|
| 1 | -3.635363000 | -3.365594000 | -1.534107000 |
| 1 | -1.586134000 | -1.963601000 | -1.489779000 |
| 8 | -2.301463000 | 2.034306000  | -0.741120000 |
| 7 | 0.000263000  | -0.651629000 | 1.887352000  |
| 1 | -0.821849000 | -1.190819000 | 2.151742000  |
| 1 | 0.822430000  | -1.190873000 | 2.151475000  |
| 1 | 0.000376000  | 0.226329000  | 2.426268000  |

**III-TS<sub>2</sub><sup>N-H</sup> (TE = -1011.334036)**

|   |              |              |              |
|---|--------------|--------------|--------------|
| 6 | 1.263106000  | 1.604780000  | -0.422572000 |
| 7 | 1.168226000  | 0.214491000  | -0.254285000 |
| 6 | -0.000019000 | -0.440796000 | -0.083861000 |
| 7 | -1.168243000 | 0.214556000  | -0.254234000 |
| 6 | -1.263093000 | 1.604857000  | -0.422387000 |
| 6 | 0.000058000  | 2.364707000  | -0.084495000 |
| 8 | 2.290166000  | 2.130721000  | -0.747386000 |
| 6 | 0.000191000  | 2.500900000  | 1.456815000  |
| 1 | -0.886591000 | 3.060949000  | 1.761681000  |
| 1 | 0.000235000  | 1.526521000  | 1.956741000  |
| 1 | 0.887014000  | 3.060969000  | 1.761524000  |
| 6 | 0.000053000  | 3.730445000  | -0.738944000 |
| 1 | 0.000049000  | 3.652668000  | -1.827229000 |
| 1 | -0.887646000 | 4.283844000  | -0.435754000 |
| 1 | 0.887755000  | 4.283847000  | -0.435768000 |
| 6 | 2.365231000  | -0.572730000 | -0.180281000 |
| 6 | 3.295142000  | -0.302181000 | 0.808341000  |
| 6 | 4.427171000  | -1.089775000 | 0.904578000  |
| 6 | 4.621200000  | -2.141439000 | 0.022170000  |
| 6 | 3.680705000  | -2.408008000 | -0.958264000 |
| 6 | 2.547370000  | -1.619940000 | -1.063620000 |
| 1 | 3.117323000  | 0.512965000  | 1.501478000  |
| 1 | 5.158155000  | -0.886069000 | 1.677617000  |
| 1 | 5.508932000  | -2.757412000 | 0.102378000  |
| 1 | 3.830116000  | -3.229893000 | -1.648012000 |
| 1 | 1.799609000  | -1.810604000 | -1.825101000 |
| 6 | -2.365260000 | -0.572655000 | -0.180258000 |
| 6 | -3.295071000 | -0.302294000 | 0.808508000  |
| 6 | -4.427108000 | -1.089886000 | 0.904685000  |
| 6 | -4.621243000 | -2.141360000 | 0.022076000  |
| 6 | -3.680847000 | -2.407742000 | -0.958505000 |

|   |              |              |              |
|---|--------------|--------------|--------------|
| 6 | -2.547506000 | -1.619677000 | -1.063800000 |
| 1 | -3.117178000 | 0.512707000  | 1.501794000  |
| 1 | -5.158016000 | -0.886326000 | 1.677835000  |
| 1 | -5.508981000 | -2.757331000 | 0.102238000  |
| 1 | -3.830341000 | -3.229479000 | -1.648412000 |
| 1 | -1.799818000 | -1.810198000 | -1.825388000 |
| 8 | -2.290188000 | 2.130872000  | -0.746972000 |
| 1 | -0.000072000 | -1.326689000 | 0.677546000  |
| 7 | -0.000074000 | -0.969043000 | 2.149463000  |
| 1 | -0.808250000 | -1.548215000 | 2.385950000  |
| 1 | 0.808042000  | -1.548265000 | 2.386021000  |

Cartesian coordinates of the transition states and the intermediates involved in the activation of P – H bond of PH<sub>3</sub> by **1**, **3** and **III-IV**, along with their total energies (in hartrees) including zero point vibrational correction.

**1TS<sub>Nu</sub><sup>P-H</sup>** (TE = -2710.942139)

|    |              |              |              |
|----|--------------|--------------|--------------|
| 6  | 0.456641000  | -1.031339000 | -0.368886000 |
| 6  | 0.958783000  | 1.270691000  | -0.161651000 |
| 7  | 1.403465000  | 0.009656000  | -0.275715000 |
| 7  | -0.757310000 | -0.613142000 | -0.202376000 |
| 25 | -1.061570000 | 1.408702000  | 0.070903000  |
| 6  | -0.746665000 | 1.148299000  | 1.893246000  |
| 8  | -0.517791000 | 0.962736000  | 2.988010000  |
| 6  | -1.263073000 | 3.205734000  | 0.281688000  |
| 8  | -1.459339000 | 4.321670000  | 0.427837000  |
| 6  | -2.894271000 | 1.209962000  | 0.260629000  |
| 8  | -4.020725000 | 1.112896000  | 0.369727000  |
| 6  | -1.204748000 | 1.514056000  | -1.791397000 |
| 8  | -1.265825000 | 1.548994000  | -2.923001000 |
| 6  | -1.780061000 | -1.587551000 | -0.301456000 |
| 6  | -2.026819000 | -2.217906000 | -1.512922000 |
| 6  | -2.542059000 | -1.911618000 | 0.813142000  |
| 6  | -3.035195000 | -3.161743000 | -1.609395000 |
| 1  | -1.419578000 | -1.953452000 | -2.372109000 |
| 6  | -3.544285000 | -2.859541000 | 0.713256000  |
| 1  | -2.330482000 | -1.427348000 | 1.761168000  |
| 6  | -3.796473000 | -3.483830000 | -0.498261000 |
| 1  | -3.226625000 | -3.647576000 | -2.559148000 |
| 1  | -4.128831000 | -3.115580000 | 1.589025000  |

|    |              |              |              |
|----|--------------|--------------|--------------|
| 1  | -4.585236000 | -4.222684000 | -0.574819000 |
| 6  | 2.789113000  | -0.359593000 | -0.362784000 |
| 6  | 3.231210000  | -1.044093000 | -1.479232000 |
| 6  | 3.641394000  | -0.097683000 | 0.696298000  |
| 6  | 4.547203000  | -1.470960000 | -1.536549000 |
| 1  | 2.537154000  | -1.250932000 | -2.285397000 |
| 6  | 4.954878000  | -0.523179000 | 0.630537000  |
| 1  | 3.264451000  | 0.415150000  | 1.574209000  |
| 6  | 5.408480000  | -1.210362000 | -0.484645000 |
| 1  | 4.897885000  | -2.013306000 | -2.406280000 |
| 1  | 5.623195000  | -0.331001000 | 1.461093000  |
| 1  | 6.436097000  | -1.550742000 | -0.528941000 |
| 8  | 1.934763000  | 2.132577000  | -0.247664000 |
| 6  | 1.682524000  | 3.529418000  | -0.193533000 |
| 1  | 0.989737000  | 3.825780000  | -0.981531000 |
| 1  | 1.291218000  | 3.811244000  | 0.783940000  |
| 1  | 2.642947000  | 4.012968000  | -0.352668000 |
| 1  | 0.920986000  | -2.113686000 | 0.284263000  |
| 15 | 1.422317000  | -2.853241000 | 1.788233000  |
| 1  | 1.315661000  | -1.592812000 | 2.447029000  |
| 1  | 0.064689000  | -3.184119000 | 2.062945000  |

**3TS<sub>Nu</sub><sup>P-H</sup> (TE = -2897.112485)**

|   |              |              |              |
|---|--------------|--------------|--------------|
| 6 | -1.495899000 | 1.065677000  | -0.750809000 |
| 7 | -1.219336000 | -0.321326000 | -0.595116000 |
| 6 | -0.026485000 | -0.949394000 | -0.560454000 |
| 7 | 1.154148000  | -0.307382000 | -0.677861000 |
| 6 | 1.405478000  | 1.082904000  | -0.841827000 |
| 8 | -2.604465000 | 1.402456000  | -1.067770000 |
| 6 | -2.352059000 | -1.214666000 | -0.527497000 |
| 6 | -2.462955000 | -2.253396000 | -1.431824000 |
| 6 | -3.520231000 | -3.141030000 | -1.323277000 |
| 6 | -4.457368000 | -2.985652000 | -0.316259000 |
| 6 | -4.336847000 | -1.941671000 | 0.587514000  |
| 6 | -3.282214000 | -1.054119000 | 0.485096000  |
| 1 | -1.714125000 | -2.363525000 | -2.207865000 |
| 1 | -3.610234000 | -3.956939000 | -2.030380000 |
| 1 | -5.282873000 | -3.682326000 | -0.232031000 |
| 1 | -5.062893000 | -1.823078000 | 1.382706000  |
| 1 | -3.170074000 | -0.240977000 | 1.194213000  |

|    |              |              |              |
|----|--------------|--------------|--------------|
| 6  | 2.296810000  | -1.190523000 | -0.692366000 |
| 6  | 2.349697000  | -2.226477000 | -1.605133000 |
| 6  | 3.416042000  | -3.109061000 | -1.573016000 |
| 6  | 4.420219000  | -2.951270000 | -0.633270000 |
| 6  | 4.358217000  | -1.909661000 | 0.279120000  |
| 6  | 3.295042000  | -1.026666000 | 0.252582000  |
| 1  | 1.548712000  | -2.339097000 | -2.326806000 |
| 1  | 3.460523000  | -3.923047000 | -2.286595000 |
| 1  | 5.252722000  | -3.644252000 | -0.607879000 |
| 1  | 5.137327000  | -1.789183000 | 1.022116000  |
| 1  | 3.228326000  | -0.214896000 | 0.968843000  |
| 8  | 2.489081000  | 1.434180000  | -1.223076000 |
| 26 | -0.041213000 | 2.410235000  | -0.401610000 |
| 6  | 0.013874000  | 1.746295000  | 1.302124000  |
| 8  | 0.045163000  | 1.309975000  | 2.344002000  |
| 6  | -0.097877000 | 2.626743000  | -2.223091000 |
| 8  | -0.132444000 | 2.714617000  | -3.347719000 |
| 6  | -1.404559000 | 3.634354000  | -0.035864000 |
| 8  | -2.237732000 | 4.360455000  | 0.183353000  |
| 6  | 1.325946000  | 3.652174000  | -0.119924000 |
| 8  | 2.160736000  | 4.389903000  | 0.048371000  |
| 1  | 0.016033000  | -1.944434000 | 0.376210000  |
| 15 | 0.092589000  | -2.532408000 | 1.966732000  |
| 1  | 1.099370000  | -1.599883000 | 2.339528000  |
| 1  | -0.961290000 | -1.685904000 | 2.408813000  |

**IIITS<sub>Nu</sub><sup>P-H</sup> (TE = -1297.963184)**

|   |              |              |              |
|---|--------------|--------------|--------------|
| 6 | 1.259424000  | 1.748594000  | -0.375246000 |
| 7 | 1.164523000  | 0.345176000  | -0.343572000 |
| 6 | -0.000004000 | -0.349036000 | -0.322428000 |
| 7 | -1.164538000 | 0.345164000  | -0.343573000 |
| 6 | -1.259441000 | 1.748585000  | -0.375247000 |
| 6 | -0.000011000 | 2.466801000  | 0.054587000  |
| 8 | 2.275464000  | 2.310760000  | -0.671873000 |
| 6 | -0.000011000 | 2.432013000  | 1.597860000  |
| 1 | -0.886919000 | 2.949472000  | 1.969452000  |
| 1 | -0.000070000 | 1.412662000  | 1.992373000  |
| 1 | 0.886956000  | 2.949370000  | 1.969454000  |
| 6 | -0.000019000 | 3.899259000  | -0.436985000 |
| 1 | -0.000069000 | 3.945878000  | -1.526702000 |

|    |              |              |              |
|----|--------------|--------------|--------------|
| 1  | -0.887777000 | 4.414648000  | -0.073021000 |
| 1  | 0.887785000  | 4.414628000  | -0.073102000 |
| 6  | 2.368096000  | -0.436378000 | -0.367732000 |
| 6  | 3.358143000  | -0.185344000 | 0.567975000  |
| 6  | 4.493764000  | -0.972642000 | 0.582648000  |
| 6  | 4.635166000  | -2.008022000 | -0.327984000 |
| 6  | 3.637196000  | -2.255806000 | -1.254840000 |
| 6  | 2.499058000  | -1.467957000 | -1.278718000 |
| 1  | 3.231040000  | 0.619051000  | 1.284155000  |
| 1  | 5.268672000  | -0.781681000 | 1.315056000  |
| 1  | 5.525596000  | -2.625040000 | -0.312286000 |
| 1  | 3.744108000  | -3.064562000 | -1.967645000 |
| 1  | 1.705880000  | -1.647554000 | -1.995015000 |
| 6  | -2.368108000 | -0.436395000 | -0.367720000 |
| 6  | -3.358177000 | -0.185335000 | 0.567957000  |
| 6  | -4.493797000 | -0.972635000 | 0.582629000  |
| 6  | -4.635176000 | -2.008046000 | -0.327969000 |
| 6  | -3.637180000 | -2.255864000 | -1.254788000 |
| 6  | -2.499046000 | -1.468011000 | -1.278669000 |
| 1  | -3.231085000 | 0.619062000  | 1.284136000  |
| 1  | -5.268720000 | -0.781652000 | 1.315015000  |
| 1  | -5.525605000 | -2.625066000 | -0.312271000 |
| 1  | -3.744070000 | -3.064649000 | -1.967563000 |
| 1  | -1.705849000 | -1.647632000 | -1.994939000 |
| 8  | -2.275479000 | 2.310749000  | -0.671878000 |
| 1  | 0.000043000  | -1.348450000 | 0.567870000  |
| 15 | 0.000089000  | -1.832294000 | 2.206304000  |
| 1  | 1.031299000  | -0.910360000 | 2.539314000  |
| 1  | -1.031588000 | -0.910852000 | 2.539217000  |

**IVTS<sub>Nu</sub><sup>P-H</sup> (TE = -942.183304)**

|   |              |              |              |
|---|--------------|--------------|--------------|
| 6 | -2.216621000 | -1.411565000 | -0.016008000 |
| 6 | -2.334662000 | 0.018148000  | 0.545034000  |
| 6 | -0.808902000 | -1.542429000 | -0.597678000 |
| 7 | -0.126050000 | -0.413448000 | 0.126420000  |
| 6 | 1.292182000  | -0.277059000 | 0.186134000  |
| 6 | 2.037614000  | -0.004446000 | -0.950852000 |
| 6 | 3.408960000  | 0.155068000  | -0.845822000 |
| 6 | 4.033069000  | 0.048640000  | 0.385616000  |
| 6 | 3.282316000  | -0.213317000 | 1.520281000  |

|    |              |              |              |
|----|--------------|--------------|--------------|
| 6  | 1.912317000  | -0.375609000 | 1.421659000  |
| 1  | 1.543997000  | 0.123282000  | -1.905701000 |
| 1  | 3.989606000  | 0.380387000  | -1.732294000 |
| 1  | 5.106019000  | 0.178074000  | 0.462594000  |
| 1  | 3.764919000  | -0.291499000 | 2.487183000  |
| 1  | 1.303486000  | -0.575239000 | 2.296515000  |
| 6  | -0.152135000 | -2.858244000 | -0.239967000 |
| 1  | -0.114910000 | -2.992158000 | 0.844018000  |
| 1  | -0.728069000 | -3.681753000 | -0.667890000 |
| 1  | 0.865756000  | -2.919938000 | -0.631703000 |
| 6  | -0.781762000 | -1.324043000 | -2.101609000 |
| 1  | -1.431299000 | -2.058015000 | -2.583910000 |
| 1  | -1.136929000 | -0.326352000 | -2.369036000 |
| 1  | 0.221145000  | -1.456088000 | -2.510361000 |
| 6  | -0.903923000 | 0.460216000  | 0.715848000  |
| 15 | -0.256397000 | 3.171757000  | -0.471605000 |
| 1  | -0.564500000 | 1.777647000  | 0.511607000  |
| 1  | -0.395725000 | 2.430292000  | -1.680537000 |
| 1  | -2.335981000 | -2.133521000 | 0.797790000  |
| 1  | -2.984399000 | -1.631381000 | -0.761969000 |
| 6  | -3.089367000 | 0.952452000  | -0.396771000 |
| 1  | -3.096565000 | 1.973512000  | -0.010165000 |
| 1  | -2.649427000 | 0.975800000  | -1.395859000 |
| 1  | -4.125266000 | 0.614338000  | -0.489588000 |
| 6  | -3.021321000 | 0.026553000  | 1.904862000  |
| 1  | -3.087130000 | 1.042643000  | 2.299657000  |
| 1  | -4.034418000 | -0.377368000 | 1.817780000  |
| 1  | -2.471892000 | -0.583637000 | 2.626179000  |
| 1  | 1.143307000  | 2.922556000  | -0.399533000 |

**3TS<sub>1</sub><sup>P-H</sup> (TE = -2897.116724)**

|   |              |              |              |
|---|--------------|--------------|--------------|
| 6 | 0.845738000  | 1.448854000  | -0.389957000 |
| 7 | -0.515740000 | 1.192683000  | -0.183520000 |
| 6 | -1.150975000 | 0.000213000  | 0.099080000  |
| 7 | -0.516145000 | -1.192348000 | -0.184103000 |
| 6 | 0.845229000  | -1.448977000 | -0.390590000 |
| 8 | 1.195619000  | 2.531511000  | -0.791196000 |
| 6 | -1.410352000 | 2.318129000  | -0.254582000 |
| 6 | -2.439232000 | 2.309450000  | -1.179435000 |
| 6 | -3.349389000 | 3.350984000  | -1.201672000 |

|    |              |              |              |
|----|--------------|--------------|--------------|
| 6  | -3.230037000 | 4.397422000  | -0.300410000 |
| 6  | -2.194456000 | 4.403294000  | 0.619690000  |
| 6  | -1.281208000 | 3.363408000  | 0.644264000  |
| 1  | -2.525116000 | 1.473757000  | -1.864807000 |
| 1  | -4.155204000 | 3.345951000  | -1.926067000 |
| 1  | -3.945454000 | 5.211082000  | -0.316303000 |
| 1  | -2.099204000 | 5.218584000  | 1.326932000  |
| 1  | -0.468790000 | 3.352935000  | 1.362648000  |
| 6  | -1.411121000 | -2.317497000 | -0.255025000 |
| 6  | -2.439963000 | -2.308685000 | -1.179911000 |
| 6  | -3.350519000 | -3.349879000 | -1.201849000 |
| 6  | -3.231603000 | -4.396079000 | -0.300247000 |
| 6  | -2.196069000 | -4.402067000 | 0.619906000  |
| 6  | -1.282425000 | -3.362521000 | 0.644178000  |
| 1  | -2.525503000 | -1.473168000 | -1.865542000 |
| 1  | -4.156317000 | -3.344766000 | -1.926263000 |
| 1  | -3.947338000 | -5.209463000 | -0.315909000 |
| 1  | -2.101182000 | -5.217156000 | 1.327428000  |
| 1  | -0.470080000 | -3.352044000 | 1.362653000  |
| 8  | 1.194743000  | -2.531651000 | -0.792091000 |
| 26 | 2.200663000  | -0.000374000 | -0.011715000 |
| 6  | 1.617795000  | -0.000933000 | 1.718470000  |
| 8  | 1.276769000  | -0.001388000 | 2.797919000  |
| 6  | 2.343062000  | 0.000053000  | -1.839607000 |
| 8  | 2.387851000  | 0.000308000  | -2.968121000 |
| 6  | 3.434587000  | 1.367475000  | 0.265492000  |
| 8  | 4.170112000  | 2.206705000  | 0.429879000  |
| 6  | 3.434281000  | -1.368678000 | 0.264638000  |
| 8  | 4.169667000  | -2.208139000 | 0.428464000  |
| 15 | -2.120337000 | -0.000104000 | 1.872418000  |
| 1  | -2.958365000 | 1.089216000  | 1.591954000  |
| 1  | -2.959618000 | -1.088282000 | 1.591275000  |
| 1  | -2.354953000 | -0.000276000 | 3.310243000  |

**3Int<sup>P-H</sup>** (TE = -2897.124152)

|   |              |              |              |
|---|--------------|--------------|--------------|
| 6 | 0.999508000  | -1.579954000 | 0.034685000  |
| 7 | -0.253620000 | -1.299831000 | -0.504160000 |
| 6 | -0.480345000 | 0.000709000  | -1.008275000 |
| 7 | -0.470345000 | 1.101972000  | -0.113795000 |
| 6 | 0.721659000  | 1.351322000  | 0.559399000  |



|    |              |              |              |
|----|--------------|--------------|--------------|
| 8  | 1.245056000  | -2.652308000 | 0.526868000  |
| 6  | -1.376533000 | -2.061366000 | -0.037837000 |
| 6  | -1.702464000 | -2.055131000 | 1.311407000  |
| 6  | -2.848201000 | -2.695656000 | 1.746546000  |
| 6  | -3.671961000 | -3.344706000 | 0.839478000  |
| 6  | -3.337467000 | -3.364152000 | -0.504099000 |
| 6  | -2.185861000 | -2.729802000 | -0.941419000 |
| 1  | -1.059724000 | -1.530208000 | 2.011252000  |
| 1  | -3.103931000 | -2.681291000 | 2.799438000  |
| 1  | -4.571898000 | -3.841257000 | 1.182128000  |
| 1  | -3.969683000 | -3.882696000 | -1.215272000 |
| 1  | -1.903266000 | -2.759248000 | -1.989281000 |
| 6  | -1.656552000 | 1.852762000  | 0.138127000  |
| 6  | -2.887553000 | 1.205150000  | 0.207046000  |
| 6  | -4.047670000 | 1.931790000  | 0.407042000  |
| 6  | -3.999211000 | 3.309265000  | 0.541674000  |
| 6  | -2.775813000 | 3.954192000  | 0.467104000  |
| 6  | -1.610209000 | 3.237770000  | 0.262810000  |
| 1  | -2.933953000 | 0.125029000  | 0.112247000  |
| 1  | -4.996099000 | 1.410330000  | 0.465145000  |
| 1  | -4.908623000 | 3.876263000  | 0.700414000  |
| 1  | -2.724019000 | 5.032631000  | 0.563137000  |
| 1  | -0.659115000 | 3.748109000  | 0.202384000  |
| 8  | 0.823797000  | 2.215756000  | 1.396002000  |
| 26 | 2.280019000  | 0.040109000  | 0.122377000  |
| 6  | 1.990521000  | 0.330120000  | -1.667104000 |
| 8  | 2.037054000  | 0.539573000  | -2.787330000 |
| 6  | 2.122768000  | -0.296518000 | 1.915369000  |
| 8  | 1.976791000  | -0.507674000 | 3.016530000  |
| 6  | 3.623620000  | -1.177992000 | -0.184367000 |
| 8  | 4.429498000  | -1.948919000 | -0.372205000 |
| 6  | 3.364871000  | 1.517587000  | 0.298531000  |
| 8  | 4.014425000  | 2.436748000  | 0.409032000  |
| 15 | -1.136244000 | 0.201771000  | -2.547123000 |
| 1  | -2.531025000 | 0.107836000  | -2.805950000 |
| 1  | -0.854244000 | 1.477819000  | -3.057489000 |
| 1  | -0.625097000 | -0.745451000 | -3.445309000 |

**3TS<sub>2</sub><sup>P-H</sup> (TE =-2897.112256)**

|    |              |              |              |
|----|--------------|--------------|--------------|
| 6  | 0.951288000  | 1.458841000  | -0.416692000 |
| 7  | -0.443729000 | 1.186938000  | -0.400522000 |
| 6  | -1.083589000 | 0.000477000  | -0.394262000 |
| 7  | -0.445243000 | -1.186828000 | -0.399693000 |
| 6  | 0.949370000  | -1.460792000 | -0.414334000 |
| 8  | 1.319090000  | 2.568182000  | -0.693773000 |
| 6  | -1.340172000 | 2.319202000  | -0.396068000 |
| 6  | -2.266673000 | 2.465563000  | -1.409777000 |
| 6  | -3.180648000 | 3.503737000  | -1.349810000 |
| 6  | -3.162213000 | 4.384738000  | -0.281416000 |
| 6  | -2.228261000 | 4.229245000  | 0.730679000  |
| 6  | -1.314354000 | 3.192902000  | 0.676729000  |
| 1  | -2.274043000 | 1.755855000  | -2.228929000 |
| 1  | -3.911045000 | 3.622690000  | -2.141101000 |
| 1  | -3.881077000 | 5.194045000  | -0.234438000 |
| 1  | -2.218672000 | 4.910524000  | 1.572856000  |
| 1  | -0.589941000 | 3.046566000  | 1.471102000  |
| 6  | -1.343315000 | -2.317828000 | -0.395398000 |
| 6  | -2.267953000 | -2.464113000 | -1.410809000 |
| 6  | -3.183486000 | -3.500942000 | -1.351477000 |
| 6  | -3.168441000 | -4.380671000 | -0.281976000 |
| 6  | -2.236355000 | -4.225247000 | 0.731845000  |
| 6  | -1.320882000 | -3.190239000 | 0.678508000  |
| 1  | -2.272633000 | -1.755403000 | -2.230847000 |
| 1  | -3.912420000 | -3.619868000 | -2.144117000 |
| 1  | -3.888500000 | -5.188943000 | -0.235486000 |
| 1  | -2.229426000 | -4.905517000 | 1.574864000  |
| 1  | -0.597893000 | -3.043889000 | 1.474175000  |
| 8  | 1.315779000  | -2.571207000 | -0.688922000 |
| 26 | 2.250150000  | -0.001425000 | 0.063217000  |
| 6  | 1.443625000  | 0.000186000  | 1.706219000  |
| 8  | 0.902965000  | 0.001146000  | 2.698329000  |
| 6  | 2.588744000  | -0.003099000 | -1.738880000 |
| 8  | 2.749715000  | -0.004083000 | -2.856348000 |
| 6  | 3.461591000  | 1.360653000  | 0.477261000  |
| 8  | 4.183348000  | 2.189587000  | 0.724495000  |
| 6  | 3.459988000  | -1.364251000 | 0.479514000  |
| 8  | 4.180861000  | -2.193532000 | 0.728152000  |
| 1  | -2.117424000 | 0.001513000  | 0.487612000  |

|    |              |              |             |
|----|--------------|--------------|-------------|
| 15 | -2.849164000 | 0.002777000  | 2.023147000 |
| 1  | -3.706476000 | 1.037557000  | 1.554668000 |
| 1  | -3.707734000 | -1.031424000 | 1.555700000 |

**III-TS<sub>1</sub><sup>P-H</sup> (TE = -1297.968613)**

|   |              |              |              |
|---|--------------|--------------|--------------|
| 6 | 1.258781000  | 1.690672000  | -0.388894000 |
| 7 | 1.175106000  | 0.320314000  | -0.203307000 |
| 6 | -0.000057000 | -0.374944000 | 0.075362000  |
| 7 | -1.175092000 | 0.320431000  | -0.203705000 |
| 6 | -1.258791000 | 1.690876000  | -0.388533000 |
| 6 | 0.000115000  | 2.455053000  | -0.024480000 |
| 8 | 2.264047000  | 2.231722000  | -0.777815000 |
| 6 | 0.000389000  | 2.604429000  | 1.506937000  |
| 1 | -0.885643000 | 3.162195000  | 1.817789000  |
| 1 | -0.000724000 | 1.639239000  | 2.021610000  |
| 1 | 0.887757000  | 3.160117000  | 1.817729000  |
| 6 | 0.000140000  | 3.821298000  | -0.678208000 |
| 1 | 0.000302000  | 3.742124000  | -1.766011000 |
| 1 | -0.888708000 | 4.374527000  | -0.377253000 |
| 1 | 0.888852000  | 4.374627000  | -0.377022000 |
| 6 | 2.369745000  | -0.462826000 | -0.256200000 |
| 6 | 3.406632000  | -0.189125000 | 0.620898000  |
| 6 | 4.534327000  | -0.991075000 | 0.618509000  |
| 6 | 4.621644000  | -2.064201000 | -0.253141000 |
| 6 | 3.580009000  | -2.333123000 | -1.127379000 |
| 6 | 2.451715000  | -1.532546000 | -1.130991000 |
| 1 | 3.322036000  | 0.651677000  | 1.300965000  |
| 1 | 5.345579000  | -0.779566000 | 1.304789000  |
| 1 | 5.504386000  | -2.692567000 | -0.252518000 |
| 1 | 3.648108000  | -3.168925000 | -1.813559000 |
| 1 | 1.621371000  | -1.732470000 | -1.798770000 |
| 6 | -2.369785000 | -0.462618000 | -0.256496000 |
| 6 | -3.406511000 | -0.189124000 | 0.620851000  |
| 6 | -4.534139000 | -0.991169000 | 0.618576000  |
| 6 | -4.621544000 | -2.064185000 | -0.253201000 |
| 6 | -3.580074000 | -2.332894000 | -1.127701000 |
| 6 | -2.451858000 | -1.532212000 | -1.131432000 |
| 1 | -3.321873000 | 0.651580000  | 1.301028000  |
| 1 | -5.345270000 | -0.779822000 | 1.305049000  |
| 1 | -5.504231000 | -2.692628000 | -0.252476000 |

|    |              |              |              |
|----|--------------|--------------|--------------|
| 1  | -3.648244000 | -3.168606000 | -1.813983000 |
| 1  | -1.621634000 | -1.731962000 | -1.799416000 |
| 8  | -2.264225000 | 2.232151000  | -0.776714000 |
| 15 | -0.000276000 | -1.327578000 | 1.745076000  |
| 1  | 1.103142000  | -2.158010000 | 1.513879000  |
| 1  | -0.000548000 | -1.429707000 | 3.196758000  |
| 1  | -1.103618000 | -2.158090000 | 1.513713000  |

**III-Int<sup>P-H</sup> (TE = -1297.962408)**

|   |              |              |              |
|---|--------------|--------------|--------------|
| 6 | 1.268616000  | 1.658193000  | -0.409311000 |
| 7 | 1.198681000  | 0.332319000  | -0.048585000 |
| 6 | -0.000016000 | -0.238132000 | 0.441852000  |
| 7 | -1.198561000 | 0.332314000  | -0.048909000 |
| 6 | -1.268412000 | 1.658145000  | -0.409767000 |
| 6 | 0.000031000  | 2.460380000  | -0.122632000 |
| 8 | 2.245955000  | 2.152847000  | -0.923120000 |
| 6 | -0.000330000 | 2.843167000  | 1.364988000  |
| 1 | -0.885810000 | 3.443322000  | 1.585221000  |
| 1 | -0.000596000 | 1.976624000  | 2.028324000  |
| 1 | 0.885117000  | 3.443182000  | 1.585730000  |
| 6 | 0.000172000  | 3.725932000  | -0.958442000 |
| 1 | 0.000519000  | 3.499064000  | -2.024949000 |
| 1 | -0.888872000 | 4.315097000  | -0.736377000 |
| 1 | 0.888970000  | 4.315271000  | -0.735849000 |
| 6 | 2.331284000  | -0.522214000 | -0.190666000 |
| 6 | 3.547994000  | -0.173835000 | 0.376761000  |
| 6 | 4.629033000  | -1.032207000 | 0.268049000  |
| 6 | 4.499556000  | -2.239150000 | -0.397629000 |
| 6 | 3.280361000  | -2.586457000 | -0.959173000 |
| 6 | 2.198514000  | -1.731944000 | -0.856499000 |
| 1 | 3.643925000  | 0.772954000  | 0.893757000  |
| 1 | 5.578024000  | -0.754790000 | 0.711641000  |
| 1 | 5.347018000  | -2.909222000 | -0.479857000 |
| 1 | 3.172548000  | -3.526729000 | -1.487140000 |
| 1 | 1.239194000  | -1.992298000 | -1.287946000 |
| 6 | -2.331238000 | -0.522125000 | -0.190891000 |
| 6 | -3.547679000 | -0.173888000 | 0.377191000  |
| 6 | -4.628798000 | -1.032179000 | 0.268659000  |
| 6 | -4.499631000 | -2.238901000 | -0.397489000 |
| 6 | -3.280700000 | -2.586062000 | -0.959695000 |

|    |              |              |              |
|----|--------------|--------------|--------------|
| 6  | -2.198781000 | -1.731612000 | -0.857205000 |
| 1  | -3.643324000 | 0.772734000  | 0.894565000  |
| 1  | -5.577596000 | -0.754896000 | 0.712750000  |
| 1  | -5.347148000 | -2.908922000 | -0.479568000 |
| 1  | -3.173164000 | -3.526156000 | -1.488033000 |
| 1  | -1.239663000 | -1.991817000 | -1.289199000 |
| 8  | -2.245584000 | 2.152704000  | -0.923994000 |
| 15 | -0.000152000 | -0.857704000 | 2.066858000  |
| 1  | -1.128404000 | -1.678107000 | 2.169951000  |
| 1  | 1.128113000  | -1.678080000 | 2.170132000  |
| 1  | -0.000216000 | -0.271177000 | 3.384723000  |

**III-TS<sub>2</sub><sup>P-H</sup> (TE = -1297.969203)**

|   |              |              |              |
|---|--------------|--------------|--------------|
| 6 | 1.261744000  | 1.794759000  | -0.356988000 |
| 7 | 1.163482000  | 0.392617000  | -0.405634000 |
| 6 | -0.000015000 | -0.302004000 | -0.425882000 |
| 7 | -1.163517000 | 0.392611000  | -0.405502000 |
| 6 | -1.261760000 | 1.794751000  | -0.356857000 |
| 6 | 0.000014000  | 2.491333000  | 0.100673000  |
| 8 | 2.284621000  | 2.367566000  | -0.605459000 |
| 6 | 0.000146000  | 2.376135000  | 1.641480000  |
| 1 | -0.887078000 | 2.873467000  | 2.038871000  |
| 1 | 0.000517000  | 1.337407000  | 1.983985000  |
| 1 | 0.887105000  | 2.874054000  | 2.038727000  |
| 6 | -0.000035000 | 3.946774000  | -0.317603000 |
| 1 | -0.000521000 | 4.048874000  | -1.403607000 |
| 1 | -0.887501000 | 4.443265000  | 0.072480000  |
| 1 | 0.887873000  | 4.443088000  | 0.071694000  |
| 6 | 2.361905000  | -0.396576000 | -0.397922000 |
| 6 | 3.279929000  | -0.212228000 | 0.622510000  |
| 6 | 4.392925000  | -1.029110000 | 0.689233000  |
| 6 | 4.581403000  | -2.026079000 | -0.255100000 |
| 6 | 3.656060000  | -2.203772000 | -1.269831000 |
| 6 | 2.541129000  | -1.386600000 | -1.345357000 |
| 1 | 3.110908000  | 0.559959000  | 1.365308000  |
| 1 | 5.110725000  | -0.893226000 | 1.489000000  |
| 1 | 5.452340000  | -2.667952000 | -0.197880000 |
| 1 | 3.801600000  | -2.981932000 | -2.009341000 |
| 1 | 1.800568000  | -1.515455000 | -2.125904000 |
| 6 | -2.361943000 | -0.396584000 | -0.397799000 |

|    |              |              |              |
|----|--------------|--------------|--------------|
| 6  | -3.279953000 | -0.212322000 | 0.622660000  |
| 6  | -4.392973000 | -1.029184000 | 0.689299000  |
| 6  | -4.581491000 | -2.026041000 | -0.255144000 |
| 6  | -3.656165000 | -2.203644000 | -1.269905000 |
| 6  | -2.541212000 | -1.386496000 | -1.345347000 |
| 1  | -3.110927000 | 0.559799000  | 1.365522000  |
| 1  | -5.110765000 | -0.893363000 | 1.489083000  |
| 1  | -5.452448000 | -2.667891000 | -0.197988000 |
| 1  | -3.801738000 | -2.981710000 | -2.009507000 |
| 1  | -1.800671000 | -1.515274000 | -2.125926000 |
| 8  | -2.284642000 | 2.367576000  | -0.605274000 |
| 1  | 0.000022000  | -1.297255000 | 0.460115000  |
| 15 | 0.000091000  | -1.814089000 | 2.089269000  |
| 1  | -1.035364000 | -2.725795000 | 1.743664000  |
| 1  | 1.036171000  | -2.725128000 | 1.743770000  |

Cartesian coordinates of the transition states and the intermediates involved in the activation of Si –H bond of SiH<sub>3</sub>Ph by **1**, **3** and **III-IV**, along with their total energies (in hartrees) including zero point vibrational correction.

**1TS<sub>PT</sub><sup>Si-H</sup>** (TE = -2890.539993)

|    |              |              |              |
|----|--------------|--------------|--------------|
| 6  | -0.232027000 | 0.685533000  | 0.927476000  |
| 6  | -0.203819000 | -1.622031000 | 0.459082000  |
| 7  | 0.466340000  | -0.540271000 | 0.892071000  |
| 7  | -1.408990000 | 0.620853000  | 0.374990000  |
| 25 | -2.030130000 | -1.199823000 | -0.357942000 |
| 6  | -1.117699000 | -0.804349000 | -1.936397000 |
| 8  | -0.530099000 | -0.543289000 | -2.870612000 |
| 6  | -2.520366000 | -2.843977000 | -0.965867000 |
| 8  | -2.885412000 | -3.842501000 | -1.384970000 |
| 6  | -3.629172000 | -0.524815000 | -1.000765000 |
| 8  | -4.623051000 | -0.138736000 | -1.393722000 |
| 6  | -2.767358000 | -1.487018000 | 1.339327000  |
| 8  | -3.183460000 | -1.638030000 | 2.383068000  |
| 6  | -2.163171000 | 1.815659000  | 0.412891000  |
| 6  | -2.514500000 | 2.380472000  | 1.633067000  |
| 6  | -2.546840000 | 2.441269000  | -0.767040000 |
| 6  | -3.250777000 | 3.551534000  | 1.670851000  |
| 1  | -2.205381000 | 1.881503000  | 2.545350000  |
| 6  | -3.279088000 | 3.614375000  | -0.724208000 |

|    |              |              |              |
|----|--------------|--------------|--------------|
| 1  | -2.252091000 | 2.010267000  | -1.718259000 |
| 6  | -3.636362000 | 4.171027000  | 0.493245000  |
| 1  | -3.527180000 | 3.981079000  | 2.626863000  |
| 1  | -3.566360000 | 4.099734000  | -1.649509000 |
| 1  | -4.213144000 | 5.087702000  | 0.523698000  |
| 6  | 1.785290000  | -0.561382000 | 1.463751000  |
| 6  | 2.006487000  | 0.108848000  | 2.654825000  |
| 6  | 2.830085000  | -1.188845000 | 0.804328000  |
| 6  | 3.283429000  | 0.149016000  | 3.188948000  |
| 1  | 1.177069000  | 0.603000000  | 3.146654000  |
| 6  | 4.097969000  | -1.156942000 | 1.352117000  |
| 1  | 2.657108000  | -1.678217000 | -0.145585000 |
| 6  | 4.328876000  | -0.488112000 | 2.543577000  |
| 1  | 3.457251000  | 0.678772000  | 4.117903000  |
| 1  | 4.914949000  | -1.637943000 | 0.828136000  |
| 1  | 5.327217000  | -0.456321000 | 2.963542000  |
| 8  | 0.441560000  | -2.728489000 | 0.715991000  |
| 6  | -0.110863000 | -3.992922000 | 0.385071000  |
| 1  | -1.085063000 | -4.124567000 | 0.857323000  |
| 1  | -0.193715000 | -4.105588000 | -0.695846000 |
| 1  | 0.583524000  | -4.733551000 | 0.773839000  |
| 1  | 0.545263000  | 1.659536000  | 0.633531000  |
| 14 | 1.518216000  | 2.454427000  | -0.776956000 |
| 1  | 0.633609000  | 2.438530000  | -1.981892000 |
| 1  | 1.904102000  | 3.874692000  | -0.532887000 |
| 6  | 3.081051000  | 1.539006000  | -1.263837000 |
| 6  | 3.057591000  | 0.505486000  | -2.203778000 |
| 6  | 4.294621000  | 1.799358000  | -0.622800000 |
| 6  | 4.196046000  | -0.226484000 | -2.500256000 |
| 1  | 2.131297000  | 0.277936000  | -2.725519000 |
| 6  | 5.435831000  | 1.074347000  | -0.916528000 |
| 1  | 4.346402000  | 2.589539000  | 0.122460000  |
| 6  | 5.391399000  | 0.056844000  | -1.858255000 |
| 1  | 4.153377000  | -1.016134000 | -3.243017000 |
| 1  | 6.366815000  | 1.301936000  | -0.408141000 |
| 1  | 6.285623000  | -0.509400000 | -2.093156000 |

**3TS<sub>PT</sub><sup>Si-H</sup> (TE = -3076.715539)**

|   |              |             |             |
|---|--------------|-------------|-------------|
| 6 | -2.454877000 | 0.600630000 | 0.027493000 |
| 7 | -1.288009000 | 1.266725000 | 0.447532000 |

|    |              |              |              |
|----|--------------|--------------|--------------|
| 6  | -0.101203000 | 0.759052000  | 0.880566000  |
| 7  | 0.120338000  | -0.570766000 | 1.053745000  |
| 6  | -0.777365000 | -1.643482000 | 0.867900000  |
| 8  | -3.471064000 | 1.230148000  | -0.119776000 |
| 6  | -1.275726000 | 2.706902000  | 0.387683000  |
| 6  | -0.995103000 | 3.437797000  | 1.526946000  |
| 6  | -0.886840000 | 4.815351000  | 1.443498000  |
| 6  | -1.053707000 | 5.453386000  | 0.225211000  |
| 6  | -1.333100000 | 4.713455000  | -0.912425000 |
| 6  | -1.443943000 | 3.336663000  | -0.834248000 |
| 1  | -0.852893000 | 2.917389000  | 2.467045000  |
| 1  | -0.669958000 | 5.392040000  | 2.334714000  |
| 1  | -0.963586000 | 6.531229000  | 0.161290000  |
| 1  | -1.456539000 | 5.208300000  | -1.868154000 |
| 1  | -1.652031000 | 2.744502000  | -1.718804000 |
| 6  | 1.432787000  | -0.877527000 | 1.565703000  |
| 6  | 1.910104000  | -0.222073000 | 2.685158000  |
| 6  | 3.197990000  | -0.476858000 | 3.127370000  |
| 6  | 3.998574000  | -1.382552000 | 2.452770000  |
| 6  | 3.513524000  | -2.030939000 | 1.327640000  |
| 6  | 2.232057000  | -1.776764000 | 0.878800000  |
| 1  | 1.269741000  | 0.487815000  | 3.195747000  |
| 1  | 3.573797000  | 0.033878000  | 4.006016000  |
| 1  | 5.006952000  | -1.578463000 | 2.798062000  |
| 1  | 4.142870000  | -2.724855000 | 0.783644000  |
| 1  | 1.852682000  | -2.262086000 | -0.013828000 |
| 8  | -0.549969000 | -2.701058000 | 1.396705000  |
| 26 | -2.396670000 | -1.388468000 | -0.308874000 |
| 6  | -1.192698000 | -1.024339000 | -1.628137000 |
| 8  | -0.411002000 | -0.784505000 | -2.410642000 |
| 6  | -3.292807000 | -1.446769000 | 1.289305000  |
| 8  | -3.810204000 | -1.453708000 | 2.293178000  |
| 6  | -3.909173000 | -1.141614000 | -1.374705000 |
| 8  | -4.819897000 | -0.981112000 | -2.019175000 |
| 6  | -2.362355000 | -3.235064000 | -0.570552000 |
| 8  | -2.331277000 | -4.351684000 | -0.722220000 |
| 1  | 0.874771000  | 1.342012000  | 0.305501000  |
| 14 | 1.802941000  | 1.791147000  | -1.192419000 |
| 1  | 2.230955000  | 3.189202000  | -0.922763000 |
| 1  | 0.996742000  | 1.756159000  | -2.439672000 |



|   |             |              |              |
|---|-------------|--------------|--------------|
| 6 | 3.302479000 | 0.705849000  | -1.410570000 |
| 6 | 4.411134000 | 0.850686000  | -0.574293000 |
| 6 | 3.323735000 | -0.325260000 | -2.351677000 |
| 6 | 5.504197000 | 0.009675000  | -0.682780000 |
| 1 | 4.417286000 | 1.635848000  | 0.177719000  |
| 6 | 4.413014000 | -1.173389000 | -2.459495000 |
| 1 | 2.476984000 | -0.460741000 | -3.018753000 |
| 6 | 5.508191000 | -1.005801000 | -1.626643000 |
| 1 | 6.355865000 | 0.142473000  | -0.024600000 |
| 1 | 4.412259000 | -1.963505000 | -3.202291000 |
| 1 | 6.364012000 | -1.665540000 | -1.712873000 |

### III-TS<sub>PT</sub><sup>Si-H</sup> (TE = -1477.567281)

|   |              |              |              |
|---|--------------|--------------|--------------|
| 6 | -0.014996000 | -2.320913000 | 0.391377000  |
| 7 | 0.150391000  | -1.006384000 | 0.841713000  |
| 6 | -0.838677000 | -0.059772000 | 0.803442000  |
| 7 | -2.047366000 | -0.412138000 | 0.264315000  |
| 6 | -2.349718000 | -1.650700000 | -0.300514000 |
| 6 | -1.139281000 | -2.508317000 | -0.607538000 |
| 8 | 0.702385000  | -3.218347000 | 0.745392000  |
| 6 | -0.601860000 | -2.013031000 | -1.963545000 |
| 1 | -1.354257000 | -2.184854000 | -2.736030000 |
| 1 | -0.364241000 | -0.946858000 | -1.947749000 |
| 1 | 0.303700000  | -2.566099000 | -2.224593000 |
| 6 | -1.527929000 | -3.969327000 | -0.704791000 |
| 1 | -1.893743000 | -4.348079000 | 0.250357000  |
| 1 | -2.316004000 | -4.092200000 | -1.446441000 |
| 1 | -0.663372000 | -4.563864000 | -0.997354000 |
| 6 | 1.372541000  | -0.616559000 | 1.482170000  |
| 6 | 2.588495000  | -1.010100000 | 0.943046000  |
| 6 | 3.763970000  | -0.578474000 | 1.525280000  |
| 6 | 3.734185000  | 0.252062000  | 2.634848000  |
| 6 | 2.517783000  | 0.647736000  | 3.162568000  |
| 6 | 1.333973000  | 0.211586000  | 2.591252000  |
| 1 | 2.612842000  | -1.639866000 | 0.062242000  |
| 1 | 4.711569000  | -0.881446000 | 1.096116000  |
| 1 | 4.659540000  | 0.591730000  | 3.084781000  |
| 1 | 2.484662000  | 1.295382000  | 4.030670000  |
| 1 | 0.373594000  | 0.511175000  | 2.993384000  |
| 6 | -3.048027000 | 0.612389000  | 0.299774000  |

|    |              |              |              |
|----|--------------|--------------|--------------|
| 6  | -3.649440000 | 1.015834000  | -0.881430000 |
| 6  | -4.565981000 | 2.051168000  | -0.859245000 |
| 6  | -4.873976000 | 2.682404000  | 0.335314000  |
| 6  | -4.263625000 | 2.276748000  | 1.510576000  |
| 6  | -3.347349000 | 1.239573000  | 1.495828000  |
| 1  | -3.392623000 | 0.518660000  | -1.810513000 |
| 1  | -5.036345000 | 2.370618000  | -1.781338000 |
| 1  | -5.590939000 | 3.494655000  | 0.349296000  |
| 1  | -4.503706000 | 2.767437000  | 2.446212000  |
| 1  | -2.854841000 | 0.909655000  | 2.403053000  |
| 8  | -3.477435000 | -1.984739000 | -0.550832000 |
| 1  | -0.436556000 | 1.050916000  | 0.362852000  |
| 14 | 0.120446000  | 1.891441000  | -1.148337000 |
| 1  | -0.109056000 | 3.335081000  | -0.901415000 |
| 1  | -0.669413000 | 1.437679000  | -2.320759000 |
| 6  | 1.923803000  | 1.546401000  | -1.435086000 |
| 6  | 2.348504000  | 0.578583000  | -2.347625000 |
| 6  | 2.894257000  | 2.201093000  | -0.673018000 |
| 6  | 3.692436000  | 0.279423000  | -2.497557000 |
| 1  | 1.619014000  | 0.059834000  | -2.963355000 |
| 6  | 4.236855000  | 1.908650000  | -0.823710000 |
| 1  | 2.591927000  | 2.952506000  | 0.051867000  |
| 6  | 4.639448000  | 0.945043000  | -1.736285000 |
| 1  | 4.002678000  | -0.470615000 | -3.216369000 |
| 1  | 4.974257000  | 2.429351000  | -0.223044000 |
| 1  | 5.691955000  | 0.714383000  | -1.854604000 |

**IV-TS<sub>PT</sub><sup>Si-H</sup> (TE = -1121.786438)**

|   |              |              |              |
|---|--------------|--------------|--------------|
| 6 | -0.893809000 | -1.285666000 | -0.870623000 |
| 7 | -1.114335000 | -0.493295000 | 0.168858000  |
| 6 | -1.842314000 | 0.714023000  | -0.006039000 |
| 6 | -3.150237000 | 0.638255000  | -0.467283000 |
| 6 | -3.880691000 | 1.792717000  | -0.675000000 |
| 6 | -3.306412000 | 3.030660000  | -0.428499000 |
| 6 | -2.000135000 | 3.106720000  | 0.022208000  |
| 6 | -1.263333000 | 1.952412000  | 0.234655000  |
| 1 | -4.902425000 | 1.727277000  | -1.030009000 |
| 1 | -3.877478000 | 3.936611000  | -0.593600000 |
| 1 | -1.542478000 | 4.072335000  | 0.202790000  |
| 1 | -3.575536000 | -0.341878000 | -0.657866000 |

|    |              |              |              |
|----|--------------|--------------|--------------|
| 1  | -0.233162000 | 2.011933000  | 0.564225000  |
| 14 | 1.289646000  | 0.087860000  | -2.369064000 |
| 1  | 2.129180000  | -0.810117000 | -3.212609000 |
| 1  | 0.978926000  | 1.302194000  | -3.175897000 |
| 1  | -0.303536000 | -0.729358000 | -1.862317000 |
| 6  | 2.350686000  | 0.668984000  | -0.933620000 |
| 6  | 3.201020000  | -0.202495000 | -0.247400000 |
| 6  | 2.252939000  | 1.977344000  | -0.453916000 |
| 6  | 3.912637000  | 0.207258000  | 0.866987000  |
| 1  | 3.319302000  | -1.224746000 | -0.598888000 |
| 6  | 2.959399000  | 2.394677000  | 0.662498000  |
| 1  | 1.615123000  | 2.687861000  | -0.973934000 |
| 6  | 3.790105000  | 1.508640000  | 1.330058000  |
| 1  | 4.569298000  | -0.490001000 | 1.375715000  |
| 1  | 2.867531000  | 3.418265000  | 1.009336000  |
| 1  | 4.345686000  | 1.832381000  | 2.202558000  |
| 6  | -0.382996000 | -2.601576000 | -0.344867000 |
| 6  | 0.055791000  | -2.280777000 | 1.093668000  |
| 6  | -0.692442000 | -1.011980000 | 1.510568000  |
| 1  | -0.130931000 | -3.104610000 | 1.788179000  |
| 1  | 1.132072000  | -2.078817000 | 1.103319000  |
| 6  | 0.728046000  | -3.218856000 | -1.171695000 |
| 1  | 0.965945000  | -4.218086000 | -0.796102000 |
| 1  | 0.427183000  | -3.314086000 | -2.218109000 |
| 1  | 1.641119000  | -2.620974000 | -1.134742000 |
| 6  | -1.585256000 | -3.552989000 | -0.372310000 |
| 1  | -1.874527000 | -3.769791000 | -1.402719000 |
| 1  | -1.324333000 | -4.493996000 | 0.120656000  |
| 1  | -2.456988000 | -3.132999000 | 0.133595000  |
| 6  | 0.225485000  | -0.051745000 | 2.243186000  |
| 1  | 1.074987000  | 0.233372000  | 1.618461000  |
| 1  | -0.298816000 | 0.849502000  | 2.567610000  |
| 1  | 0.613896000  | -0.547645000 | 3.136691000  |
| 6  | -1.928072000 | -1.277235000 | 2.354641000  |
| 1  | -1.633130000 | -1.679322000 | 3.326340000  |
| 1  | -2.481404000 | -0.350832000 | 2.529125000  |
| 1  | -2.602665000 | -1.991675000 | 1.879778000  |

$\mathbf{1}_v$  (TE = -2890.576541)

|    |              |              |              |
|----|--------------|--------------|--------------|
| 6  | -0.181246000 | 0.569063000  | 0.146417000  |
| 6  | 2.210273000  | 0.710878000  | 0.188832000  |
| 7  | 1.021372000  | 1.333302000  | 0.176987000  |
| 7  | 0.102855000  | -0.684719000 | 0.037930000  |
| 25 | 2.072561000  | -1.308588000 | 0.027207000  |
| 6  | 2.048632000  | -1.030649000 | -1.815348000 |
| 8  | 2.005726000  | -0.809628000 | -2.927978000 |
| 6  | 3.827179000  | -1.791007000 | 0.034352000  |
| 8  | 4.908873000  | -2.161176000 | 0.030207000  |
| 6  | 1.600590000  | -3.094218000 | -0.124890000 |
| 8  | 1.324740000  | -4.193716000 | -0.204259000 |
| 6  | 1.939568000  | -1.369301000 | 1.886706000  |
| 8  | 1.835390000  | -1.374524000 | 3.016664000  |
| 6  | -0.975035000 | -1.609276000 | 0.010099000  |
| 6  | -1.647800000 | -1.929515000 | 1.179545000  |
| 6  | -1.323359000 | -2.233981000 | -1.179217000 |
| 6  | -2.662173000 | -2.871512000 | 1.158327000  |
| 1  | -1.370539000 | -1.422606000 | 2.097908000  |
| 6  | -2.338243000 | -3.174341000 | -1.196010000 |
| 1  | -0.794974000 | -1.973320000 | -2.090727000 |
| 6  | -3.006852000 | -3.499807000 | -0.026717000 |
| 1  | -3.190598000 | -3.110586000 | 2.074111000  |
| 1  | -2.609417000 | -3.654236000 | -2.129317000 |
| 1  | -3.800434000 | -4.237571000 | -0.040714000 |
| 6  | 0.868664000  | 2.760325000  | 0.207763000  |
| 6  | 0.201540000  | 3.342937000  | 1.269808000  |
| 6  | 1.311432000  | 3.527193000  | -0.855347000 |
| 6  | -0.023020000 | 4.708647000  | 1.267314000  |
| 1  | -0.156349000 | 2.715541000  | 2.077839000  |
| 6  | 1.088476000  | 4.892734000  | -0.850921000 |
| 1  | 1.809017000  | 3.047202000  | -1.690897000 |
| 6  | 0.420236000  | 5.484698000  | 0.208586000  |
| 1  | -0.551224000 | 5.167514000  | 2.094613000  |
| 1  | 1.426196000  | 5.494586000  | -1.686143000 |
| 1  | 0.238465000  | 6.552810000  | 0.205745000  |
| 8  | 3.199530000  | 1.555708000  | 0.301823000  |
| 6  | 4.544691000  | 1.102793000  | 0.360554000  |
| 1  | 4.687939000  | 0.431588000  | 1.207563000  |
| 1  | 4.823896000  | 0.606958000  | -0.569219000 |

|    |              |              |              |
|----|--------------|--------------|--------------|
| 1  | 5.154442000  | 1.992752000  | 0.494710000  |
| 14 | -2.319715000 | 1.694378000  | -1.867664000 |
| 1  | -1.339702000 | 0.723598000  | -2.407563000 |
| 1  | -1.641866000 | 2.899480000  | -1.347679000 |
| 1  | -3.153439000 | 2.110588000  | -3.028512000 |
| 6  | -3.471194000 | 0.962390000  | -0.595198000 |
| 6  | -4.316981000 | -0.088986000 | -0.939239000 |
| 6  | -3.533897000 | 1.458488000  | 0.704855000  |
| 6  | -5.189304000 | -0.638386000 | -0.013937000 |
| 1  | -4.290440000 | -0.495029000 | -1.947698000 |
| 6  | -4.413189000 | 0.923840000  | 1.630660000  |
| 1  | -2.871165000 | 2.267281000  | 0.998220000  |
| 6  | -5.240474000 | -0.129397000 | 1.272909000  |
| 1  | -5.828055000 | -1.467747000 | -0.297226000 |
| 1  | -4.450383000 | 1.324781000  | 2.637654000  |
| 1  | -5.924126000 | -0.555223000 | 1.998953000  |

**1TS<sub>hy</sub><sup>Si-H</sup> (TE = -2890.553257)**

|    |              |              |              |
|----|--------------|--------------|--------------|
| 6  | 0.389480000  | 0.254895000  | 0.524809000  |
| 6  | -1.424006000 | 1.546815000  | -0.270527000 |
| 7  | -0.160201000 | 1.514495000  | 0.161139000  |
| 7  | -0.413735000 | -0.728100000 | 0.213435000  |
| 25 | -2.363793000 | -0.250287000 | -0.243556000 |
| 6  | -2.629307000 | 0.025398000  | 1.593186000  |
| 8  | -2.769208000 | 0.207963000  | 2.701963000  |
| 6  | -4.077864000 | 0.236532000  | -0.617587000 |
| 8  | -5.171396000 | 0.482421000  | -0.839194000 |
| 6  | -2.901516000 | -2.023809000 | -0.132198000 |
| 8  | -3.232059000 | -3.108365000 | -0.069868000 |
| 6  | -1.935983000 | -0.412497000 | -2.051866000 |
| 8  | -1.654945000 | -0.483804000 | -3.148543000 |
| 6  | -0.020333000 | -2.075461000 | 0.400775000  |
| 6  | 0.355226000  | -2.837585000 | -0.697398000 |
| 6  | -0.082991000 | -2.661846000 | 1.657939000  |
| 6  | 0.671091000  | -4.175025000 | -0.538695000 |
| 1  | 0.410934000  | -2.364077000 | -1.672064000 |
| 6  | 0.235555000  | -4.000440000 | 1.812897000  |
| 1  | -0.376986000 | -2.057658000 | 2.510243000  |
| 6  | 0.609890000  | -4.760422000 | 0.716307000  |
| 1  | 0.973483000  | -4.760941000 | -1.398848000 |

|    |              |              |              |
|----|--------------|--------------|--------------|
| 1  | 0.190195000  | -4.451760000 | 2.797012000  |
| 1  | 0.855516000  | -5.808362000 | 0.840052000  |
| 6  | 0.656404000  | 2.692613000  | 0.254806000  |
| 6  | 1.598413000  | 2.937723000  | -0.725890000 |
| 6  | 0.507350000  | 3.538368000  | 1.338528000  |
| 6  | 2.426415000  | 4.040717000  | -0.606435000 |
| 1  | 1.691561000  | 2.251877000  | -1.561003000 |
| 6  | 1.339493000  | 4.637040000  | 1.452847000  |
| 1  | -0.237933000 | 3.310368000  | 2.092161000  |
| 6  | 2.300993000  | 4.884314000  | 0.484889000  |
| 1  | 3.175765000  | 4.235862000  | -1.364250000 |
| 1  | 1.243056000  | 5.298877000  | 2.304904000  |
| 1  | 2.955926000  | 5.742002000  | 0.582002000  |
| 8  | -1.766201000 | 2.753886000  | -0.636895000 |
| 6  | -3.058996000 | 3.014584000  | -1.162503000 |
| 1  | -3.266801000 | 2.371795000  | -2.018617000 |
| 1  | -3.819463000 | 2.881033000  | -0.393328000 |
| 1  | -3.046996000 | 4.053176000  | -1.483119000 |
| 14 | 2.018778000  | 0.148388000  | 1.512064000  |
| 1  | 2.612491000  | 1.460638000  | 1.864011000  |
| 1  | 2.082646000  | -0.951451000 | 2.505737000  |
| 6  | 3.314709000  | -0.499357000 | 0.253221000  |
| 6  | 3.517800000  | -1.866176000 | 0.068342000  |
| 6  | 4.079962000  | 0.369458000  | -0.523969000 |
| 6  | 4.419735000  | -2.349363000 | -0.866143000 |
| 1  | 2.953228000  | -2.575832000 | 0.670158000  |
| 6  | 4.990479000  | -0.099305000 | -1.458684000 |
| 1  | 3.970709000  | 1.443647000  | -0.385615000 |
| 6  | 5.156974000  | -1.463669000 | -1.636324000 |
| 1  | 4.551946000  | -3.419345000 | -0.990938000 |
| 1  | 5.576805000  | 0.599012000  | -2.046897000 |
| 1  | 5.866561000  | -1.835742000 | -2.367129000 |
| 1  | 0.535304000  | 0.671679000  | 2.334857000  |

$3_v$  (TE = -3076.743925)

|   |              |              |             |
|---|--------------|--------------|-------------|
| 6 | 1.355465000  | -1.629246000 | 0.432803000 |
| 7 | 0.077939000  | -0.997330000 | 0.306076000 |
| 6 | -0.249883000 | 0.308170000  | 0.262143000 |
| 7 | 0.707536000  | 1.256257000  | 0.319156000 |
| 6 | 2.126534000  | 1.136471000  | 0.459040000 |

|    |              |              |              |
|----|--------------|--------------|--------------|
| 8  | 1.403602000  | -2.781536000 | 0.761713000  |
| 6  | -1.053572000 | -1.900758000 | 0.299397000  |
| 6  | -1.961713000 | -1.881605000 | 1.339364000  |
| 6  | -3.042764000 | -2.745322000 | 1.315091000  |
| 6  | -3.211740000 | -3.618989000 | 0.254101000  |
| 6  | -2.299330000 | -3.627146000 | -0.788452000 |
| 6  | -1.215745000 | -2.767267000 | -0.766111000 |
| 1  | -1.823739000 | -1.177877000 | 2.152331000  |
| 1  | -3.763354000 | -2.725119000 | 2.124061000  |
| 1  | -4.063804000 | -4.288514000 | 0.234453000  |
| 1  | -2.432486000 | -4.303248000 | -1.624656000 |
| 1  | -0.492325000 | -2.761007000 | -1.575231000 |
| 6  | 0.199325000  | 2.610670000  | 0.308416000  |
| 6  | -0.662622000 | 3.033254000  | 1.300605000  |
| 6  | -1.203559000 | 4.306534000  | 1.237284000  |
| 6  | -0.872718000 | 5.151853000  | 0.190933000  |
| 6  | 0.004824000  | 4.723934000  | -0.792439000 |
| 6  | 0.542170000  | 3.450962000  | -0.734892000 |
| 1  | -0.922888000 | 2.351147000  | 2.102077000  |
| 1  | -1.887645000 | 4.638339000  | 2.009473000  |
| 1  | -1.299915000 | 6.146296000  | 0.141277000  |
| 1  | 0.262714000  | 5.379880000  | -1.615250000 |
| 1  | 1.214834000  | 3.096174000  | -1.509127000 |
| 8  | 2.757106000  | 2.093903000  | 0.811929000  |
| 26 | 3.013863000  | -0.595346000 | -0.034838000 |
| 6  | 2.247837000  | -0.362372000 | -1.678339000 |
| 8  | 1.725850000  | -0.201290000 | -2.668205000 |
| 6  | 3.338952000  | -0.706657000 | 1.768048000  |
| 8  | 3.496333000  | -0.762897000 | 2.884210000  |
| 6  | 3.806946000  | -2.232923000 | -0.458203000 |
| 8  | 4.268019000  | -3.229752000 | -0.710520000 |
| 6  | 4.543480000  | 0.402295000  | -0.427114000 |
| 8  | 5.455621000  | 1.022226000  | -0.658939000 |
| 14 | -2.428121000 | 0.833046000  | -2.084025000 |
| 1  | -1.383155000 | -0.202879000 | -2.250104000 |
| 1  | -1.819106000 | 2.142046000  | -1.771307000 |
| 1  | -3.115278000 | 0.939332000  | -3.397311000 |
| 6  | -3.720946000 | 0.383151000  | -0.815237000 |
| 6  | -4.652819000 | -0.615210000 | -1.090563000 |
| 6  | -3.814261000 | 1.050744000  | 0.404260000  |

|   |              |              |              |
|---|--------------|--------------|--------------|
| 6 | -5.642378000 | -0.943228000 | -0.178690000 |
| 1 | -4.605259000 | -1.150535000 | -2.035819000 |
| 6 | -4.804231000 | 0.731580000  | 1.318120000  |
| 1 | -3.096120000 | 1.830044000  | 0.641173000  |
| 6 | -5.719912000 | -0.267769000 | 1.027886000  |
| 1 | -6.353953000 | -1.728389000 | -0.409602000 |
| 1 | -4.863956000 | 1.265074000  | 2.260432000  |
| 1 | -6.495906000 | -0.518917000 | 1.742426000  |

**3TS<sub>hy</sub><sup>Si-H</sup> (TE = -3076.721379)**

|    |              |              |              |
|----|--------------|--------------|--------------|
| 6  | -2.018378000 | 1.208586000  | -0.036318000 |
| 7  | -0.612429000 | 1.318228000  | 0.053604000  |
| 6  | 0.309081000  | 0.312456000  | 0.202234000  |
| 7  | 0.032829000  | -0.938379000 | -0.278965000 |
| 6  | -1.224466000 | -1.517724000 | -0.564644000 |
| 8  | -2.671770000 | 2.208800000  | -0.179270000 |
| 6  | -0.073089000 | 2.648598000  | -0.106510000 |
| 6  | -0.309215000 | 3.631423000  | 0.838085000  |
| 6  | 0.236395000  | 4.888866000  | 0.661454000  |
| 6  | 1.009722000  | 5.163887000  | -0.456313000 |
| 6  | 1.229607000  | 4.180270000  | -1.404808000 |
| 6  | 0.680309000  | 2.920237000  | -1.233049000 |
| 1  | -0.906789000 | 3.400486000  | 1.711957000  |
| 1  | 0.061802000  | 5.658355000  | 1.403786000  |
| 1  | 1.438584000  | 6.150035000  | -0.588724000 |
| 1  | 1.826369000  | 4.392337000  | -2.283974000 |
| 1  | 0.838739000  | 2.136268000  | -1.967021000 |
| 6  | 1.157136000  | -1.834666000 | -0.381033000 |
| 6  | 1.332116000  | -2.809617000 | 0.585266000  |
| 6  | 2.415777000  | -3.666494000 | 0.496991000  |
| 6  | 3.306556000  | -3.547837000 | -0.556712000 |
| 6  | 3.117702000  | -2.573125000 | -1.523809000 |
| 6  | 2.038811000  | -1.712798000 | -1.437952000 |
| 1  | 0.615345000  | -2.892993000 | 1.396773000  |
| 1  | 2.563229000  | -4.428492000 | 1.252787000  |
| 1  | 4.156652000  | -4.216473000 | -0.623508000 |
| 1  | 3.818208000  | -2.478277000 | -2.344699000 |
| 1  | 1.879332000  | -0.933641000 | -2.175681000 |
| 8  | -1.254424000 | -2.588626000 | -1.112635000 |
| 14 | 1.697852000  | 0.506917000  | 1.755558000  |



|    |              |              |              |
|----|--------------|--------------|--------------|
| 1  | 2.106614000  | -0.102687000 | 3.075351000  |
| 1  | 0.244750000  | -0.079140000 | 1.938254000  |
| 1  | 1.502671000  | 1.947479000  | 2.006311000  |
| 6  | 3.318458000  | 0.230758000  | 0.833048000  |
| 6  | 3.660698000  | 0.991818000  | -0.283736000 |
| 6  | 4.253151000  | -0.680052000 | 1.312379000  |
| 6  | 4.887889000  | 0.843153000  | -0.904441000 |
| 1  | 2.953591000  | 1.720600000  | -0.670940000 |
| 6  | 5.478029000  | -0.851543000 | 0.684356000  |
| 1  | 4.015169000  | -1.274683000 | 2.190521000  |
| 6  | 5.797951000  | -0.088144000 | -0.424539000 |
| 1  | 5.140046000  | 1.455111000  | -1.763693000 |
| 1  | 6.184857000  | -1.581267000 | 1.064223000  |
| 1  | 6.757722000  | -0.212873000 | -0.913360000 |
| 26 | -2.915905000 | -0.593248000 | 0.003173000  |
| 6  | -2.390348000 | -0.827716000 | 1.743642000  |
| 8  | -2.123139000 | -1.016490000 | 2.826054000  |
| 6  | -4.481818000 | 0.309082000  | 0.481880000  |
| 8  | -5.419685000 | 0.864504000  | 0.767890000  |
| 6  | -3.742369000 | -2.266486000 | -0.066889000 |
| 8  | -4.230764000 | -3.280953000 | -0.116469000 |
| 6  | -3.071805000 | -0.273514000 | -1.796476000 |
| 8  | -3.125328000 | -0.070440000 | -2.905811000 |

### III<sub>v</sub> (TE = -1477.596093)

|   |              |              |              |
|---|--------------|--------------|--------------|
| 6 | -2.932352000 | -0.954780000 | -0.338808000 |
| 7 | -1.921988000 | 0.034756000  | -0.323426000 |
| 6 | -0.587736000 | -0.186994000 | -0.341946000 |
| 7 | -0.191381000 | -1.477955000 | -0.333343000 |
| 6 | -1.038268000 | -2.610610000 | -0.346854000 |
| 6 | -2.459423000 | -2.326440000 | 0.074472000  |
| 8 | -4.073592000 | -0.696898000 | -0.591286000 |
| 6 | -2.430457000 | -2.301822000 | 1.620115000  |
| 1 | -2.101385000 | -3.275821000 | 1.987698000  |
| 1 | -1.756735000 | -1.534769000 | 2.010091000  |
| 1 | -3.437486000 | -2.107764000 | 1.994692000  |
| 6 | -3.404202000 | -3.404592000 | -0.414091000 |
| 1 | -3.439916000 | -3.437069000 | -1.503800000 |
| 1 | -3.072552000 | -4.377585000 | -0.054287000 |
| 1 | -4.410273000 | -3.209937000 | -0.045134000 |

|    |              |              |              |
|----|--------------|--------------|--------------|
| 6  | -2.335473000 | 1.413149000  | -0.343669000 |
| 6  | -3.172265000 | 1.884065000  | 0.652231000  |
| 6  | -3.501840000 | 3.226600000  | 0.686372000  |
| 6  | -2.993903000 | 4.091940000  | -0.269409000 |
| 6  | -2.161359000 | 3.609753000  | -1.265785000 |
| 6  | -1.833192000 | 2.265456000  | -1.307788000 |
| 1  | -3.547435000 | 1.201059000  | 1.407055000  |
| 1  | -4.149410000 | 3.600325000  | 1.470330000  |
| 1  | -3.247870000 | 5.144697000  | -0.237053000 |
| 1  | -1.764381000 | 4.282604000  | -2.016582000 |
| 1  | -1.169448000 | 1.871938000  | -2.068774000 |
| 6  | 1.229040000  | -1.714590000 | -0.365758000 |
| 6  | 1.811079000  | -2.457046000 | 0.646199000  |
| 6  | 3.178339000  | -2.667424000 | 0.636121000  |
| 6  | 3.954683000  | -2.134126000 | -0.379801000 |
| 6  | 3.363202000  | -1.385011000 | -1.383027000 |
| 6  | 1.996053000  | -1.172776000 | -1.378773000 |
| 1  | 1.191121000  | -2.864737000 | 1.438136000  |
| 1  | 3.638505000  | -3.246607000 | 1.427692000  |
| 1  | 5.026309000  | -2.295651000 | -0.384804000 |
| 1  | 3.969293000  | -0.956128000 | -2.171984000 |
| 1  | 1.517637000  | -0.577133000 | -2.147367000 |
| 8  | -0.632915000 | -3.707220000 | -0.602950000 |
| 14 | 0.796029000  | 1.331485000  | 2.080505000  |
| 1  | 0.417458000  | -0.097607000 | 2.202397000  |
| 1  | -0.380181000 | 2.143473000  | 1.705237000  |
| 1  | 1.245510000  | 1.750454000  | 3.432165000  |
| 6  | 2.204970000  | 1.606338000  | 0.890758000  |
| 6  | 3.476262000  | 1.121803000  | 1.190193000  |
| 6  | 2.034701000  | 2.323477000  | -0.291660000 |
| 6  | 4.545222000  | 1.343241000  | 0.338331000  |
| 1  | 3.636597000  | 0.557407000  | 2.105744000  |
| 6  | 3.100721000  | 2.552669000  | -1.145096000 |
| 1  | 1.049406000  | 2.701233000  | -0.549523000 |
| 6  | 4.358686000  | 2.063050000  | -0.830142000 |
| 1  | 5.525694000  | 0.951366000  | 0.585571000  |
| 1  | 2.951361000  | 3.116810000  | -2.059074000 |
| 1  | 5.194469000  | 2.242016000  | -1.497333000 |

**III-TS<sub>hy</sub><sup>Si-H</sup> (TE = -1477.574031)**

|    |              |              |              |
|----|--------------|--------------|--------------|
| 6  | -2.714418000 | -1.094185000 | -0.461013000 |
| 7  | -1.844932000 | -0.038371000 | -0.153823000 |
| 6  | -0.509375000 | -0.181735000 | 0.121945000  |
| 7  | 0.042623000  | -1.400733000 | -0.187610000 |
| 6  | -0.681918000 | -2.567813000 | -0.453931000 |
| 6  | -2.166798000 | -2.475519000 | -0.196711000 |
| 8  | -3.831272000 | -0.892135000 | -0.850515000 |
| 6  | -2.350581000 | -2.722985000 | 1.315034000  |
| 1  | -1.979762000 | -3.719277000 | 1.562679000  |
| 1  | -1.816182000 | -1.990733000 | 1.928078000  |
| 1  | -3.413089000 | -2.671226000 | 1.560514000  |
| 6  | -2.921754000 | -3.519544000 | -0.993684000 |
| 1  | -2.807967000 | -3.360930000 | -2.066869000 |
| 1  | -2.543098000 | -4.511696000 | -0.752113000 |
| 1  | -3.982740000 | -3.471176000 | -0.752458000 |
| 6  | -2.419457000 | 1.277348000  | -0.100175000 |
| 6  | -3.288591000 | 1.583226000  | 0.931085000  |
| 6  | -3.794424000 | 2.865443000  | 1.032730000  |
| 6  | -3.431763000 | 3.829077000  | 0.104322000  |
| 6  | -2.576724000 | 3.506544000  | -0.936381000 |
| 6  | -2.072901000 | 2.221760000  | -1.045289000 |
| 1  | -3.544276000 | 0.817284000  | 1.656594000  |
| 1  | -4.466712000 | 3.117007000  | 1.843943000  |
| 1  | -3.822818000 | 4.835846000  | 0.189908000  |
| 1  | -2.302588000 | 4.256135000  | -1.668751000 |
| 1  | -1.405914000 | 1.947448000  | -1.854804000 |
| 6  | 1.471417000  | -1.541636000 | -0.086712000 |
| 6  | 2.005951000  | -2.052169000 | 1.082621000  |
| 6  | 3.380416000  | -2.163937000 | 1.207079000  |
| 6  | 4.201473000  | -1.776871000 | 0.161293000  |
| 6  | 3.653471000  | -1.287152000 | -1.013982000 |
| 6  | 2.281927000  | -1.171302000 | -1.142660000 |
| 1  | 1.341894000  | -2.356662000 | 1.885739000  |
| 1  | 3.808839000  | -2.554667000 | 2.121953000  |
| 1  | 5.277303000  | -1.859081000 | 0.260952000  |
| 1  | 4.297616000  | -0.984319000 | -1.830588000 |
| 1  | 1.833700000  | -0.778437000 | -2.047899000 |
| 8  | -0.135117000 | -3.579127000 | -0.798633000 |
| 14 | 0.429034000  | 0.997310000  | 1.504333000  |

|   |              |              |              |
|---|--------------|--------------|--------------|
| 1 | 1.138241000  | 0.862186000  | 2.827157000  |
| 1 | -0.491400000 | -0.260210000 | 1.907476000  |
| 1 | -0.546618000 | 2.097120000  | 1.630694000  |
| 6 | 1.906193000  | 1.590787000  | 0.484684000  |
| 6 | 1.760431000  | 2.072173000  | -0.814557000 |
| 6 | 3.176714000  | 1.613572000  | 1.048205000  |
| 6 | 2.841321000  | 2.557179000  | -1.528254000 |
| 1 | 0.779026000  | 2.059515000  | -1.282378000 |
| 6 | 4.271136000  | 2.083631000  | 0.336735000  |
| 1 | 3.314490000  | 1.245936000  | 2.061854000  |
| 6 | 4.104295000  | 2.557265000  | -0.952783000 |
| 1 | 2.703992000  | 2.935909000  | -2.535242000 |
| 1 | 5.256466000  | 2.077952000  | 0.789896000  |
| 1 | 4.956140000  | 2.928607000  | -1.511386000 |

**IV<sub>v</sub>** (TE = -1121.816877)

|    |              |              |              |
|----|--------------|--------------|--------------|
| 6  | -1.205092000 | -0.760859000 | 0.223195000  |
| 7  | -1.184033000 | 0.506508000  | -0.080102000 |
| 6  | -0.050262000 | 1.326008000  | 0.227976000  |
| 6  | 0.823857000  | 1.725698000  | -0.768460000 |
| 6  | 1.923495000  | 2.501203000  | -0.443870000 |
| 6  | 2.150404000  | 2.875367000  | 0.869916000  |
| 6  | 1.278392000  | 2.464740000  | 1.865541000  |
| 6  | 0.177215000  | 1.690390000  | 1.545522000  |
| 1  | 0.656991000  | 1.403999000  | -1.789705000 |
| 1  | 2.615891000  | 2.799289000  | -1.222456000 |
| 1  | 3.014799000  | 3.478945000  | 1.120531000  |
| 1  | 1.457855000  | 2.744399000  | 2.896926000  |
| 1  | -0.508272000 | 1.343533000  | 2.311717000  |
| 14 | 0.905926000  | -2.245355000 | 1.719529000  |
| 1  | -0.087194000 | -3.258362000 | 1.312939000  |
| 1  | 0.346052000  | -1.211708000 | 2.613887000  |
| 1  | 1.904549000  | -2.969078000 | 2.566377000  |
| 6  | 1.915980000  | -1.584218000 | 0.289728000  |
| 6  | 3.044122000  | -0.811112000 | 0.551789000  |
| 6  | 1.616274000  | -1.872130000 | -1.040243000 |
| 6  | 3.839480000  | -0.327670000 | -0.475016000 |
| 1  | 3.305922000  | -0.572455000 | 1.580196000  |
| 6  | 2.413486000  | -1.404826000 | -2.071358000 |
| 1  | 0.736996000  | -2.466839000 | -1.270911000 |

|   |              |              |              |
|---|--------------|--------------|--------------|
| 6 | 3.526814000  | -0.627086000 | -1.790041000 |
| 1 | 4.705058000  | 0.284961000  | -0.247113000 |
| 1 | 2.166492000  | -1.646660000 | -3.099448000 |
| 1 | 4.149868000  | -0.256090000 | -2.596284000 |
| 6 | -2.589811000 | -1.262477000 | -0.096651000 |
| 6 | -2.456231000 | 1.133118000  | -0.609549000 |
| 6 | -3.287561000 | -0.121732000 | -0.861269000 |
| 1 | -4.327265000 | 0.017873000  | -0.553122000 |
| 1 | -3.294390000 | -0.346193000 | -1.932268000 |
| 6 | -3.258005000 | -1.558693000 | 1.244642000  |
| 1 | -4.277591000 | -1.920728000 | 1.083434000  |
| 1 | -2.699587000 | -2.322633000 | 1.790299000  |
| 1 | -3.310023000 | -0.668979000 | 1.877996000  |
| 6 | -2.516465000 | -2.537075000 | -0.920343000 |
| 1 | -1.980757000 | -2.365882000 | -1.858498000 |
| 1 | -1.995279000 | -3.324505000 | -0.371053000 |
| 1 | -3.521807000 | -2.892715000 | -1.165622000 |
| 6 | -3.045460000 | 2.042193000  | 0.454344000  |
| 1 | -2.368279000 | 2.867422000  | 0.687457000  |
| 1 | -3.983429000 | 2.470268000  | 0.093391000  |
| 1 | -3.252571000 | 1.497168000  | 1.377855000  |
| 6 | -2.200554000 | 1.917661000  | -1.879316000 |
| 1 | -3.154288000 | 2.263115000  | -2.285651000 |
| 1 | -1.577784000 | 2.796319000  | -1.697710000 |
| 1 | -1.717158000 | 1.293932000  | -2.635073000 |

**IV-TS<sub>hy</sub><sup>Si-H</sup> (TE = -1121.807217)**

|   |              |              |              |
|---|--------------|--------------|--------------|
| 6 | 1.143705000  | -0.725604000 | -0.272516000 |
| 7 | 1.122169000  | 0.520120000  | 0.162436000  |
| 6 | -0.025050000 | 1.360692000  | 0.017072000  |
| 6 | -0.878363000 | 1.544159000  | 1.093425000  |
| 6 | -2.009702000 | 2.324738000  | 0.945960000  |
| 6 | -2.288557000 | 2.919390000  | -0.274924000 |
| 6 | -1.434609000 | 2.733664000  | -1.348065000 |
| 6 | -0.297597000 | 1.954718000  | -1.205553000 |
| 1 | -0.660426000 | 1.046625000  | 2.031898000  |
| 1 | -2.685727000 | 2.454497000  | 1.782536000  |
| 1 | -3.180863000 | 3.522908000  | -0.391302000 |
| 1 | -1.655330000 | 3.189537000  | -2.305711000 |
| 1 | 0.366260000  | 1.785290000  | -2.045960000 |

|    |              |              |              |
|----|--------------|--------------|--------------|
| 14 | -0.117952000 | -1.422156000 | -1.594970000 |
| 1  | 0.306747000  | -2.842250000 | -1.697899000 |
| 1  | 1.219823000  | -0.722353000 | -2.180118000 |
| 1  | -0.840150000 | -1.037956000 | -2.870551000 |
| 6  | -1.693331000 | -1.386735000 | -0.503440000 |
| 6  | -2.895288000 | -0.894175000 | -0.998575000 |
| 6  | -1.678978000 | -1.844116000 | 0.813290000  |
| 6  | -4.038026000 | -0.843216000 | -0.212565000 |
| 1  | -2.932362000 | -0.529094000 | -2.022960000 |
| 6  | -2.815113000 | -1.817280000 | 1.603651000  |
| 1  | -0.751750000 | -2.229310000 | 1.234646000  |
| 6  | -4.000280000 | -1.308402000 | 1.090927000  |
| 1  | -4.960346000 | -0.440225000 | -0.617663000 |
| 1  | -2.781437000 | -2.191014000 | 2.621758000  |
| 1  | -4.891172000 | -1.275565000 | 1.708357000  |
| 6  | 2.470836000  | -1.352775000 | 0.116671000  |
| 6  | 2.462404000  | 1.084525000  | 0.524635000  |
| 6  | 3.232859000  | -0.200857000 | 0.809725000  |
| 1  | 4.265949000  | -0.129081000 | 0.462064000  |
| 1  | 3.264819000  | -0.372893000 | 1.889403000  |
| 6  | 3.267856000  | -1.947996000 | -1.034640000 |
| 1  | 4.177481000  | -2.406474000 | -0.635973000 |
| 1  | 2.699568000  | -2.717915000 | -1.557753000 |
| 1  | 3.557233000  | -1.187878000 | -1.762129000 |
| 6  | 2.160845000  | -2.458441000 | 1.126357000  |
| 1  | 1.558145000  | -2.075629000 | 1.955336000  |
| 1  | 1.618464000  | -3.281990000 | 0.656633000  |
| 1  | 3.093602000  | -2.850151000 | 1.541174000  |
| 6  | 3.025714000  | 1.840112000  | -0.665662000 |
| 1  | 2.427854000  | 2.725568000  | -0.893073000 |
| 1  | 4.043186000  | 2.169478000  | -0.444019000 |
| 1  | 3.057859000  | 1.206352000  | -1.556129000 |
| 6  | 2.362591000  | 1.986121000  | 1.734019000  |
| 1  | 3.364248000  | 2.304283000  | 2.031290000  |
| 1  | 1.775116000  | 2.882411000  | 1.522427000  |
| 1  | 1.907873000  | 1.461040000  | 2.577482000  |

Cartesian coordinates of the transition states involved in the activation of C – H bond of CH<sub>4</sub> by **1**, **3** and **III-IV**, along with their total energies (in hartrees) including zero point vibrational correction.

**1TS<sup>C-H</sup>** (TE = -2408.234110)

|    |              |              |              |
|----|--------------|--------------|--------------|
| 6  | 0.426759000  | -1.191730000 | -0.056252000 |
| 6  | 1.102344000  | 1.050776000  | -0.136466000 |
| 7  | 1.451787000  | -0.238435000 | -0.091240000 |
| 7  | -0.778820000 | -0.692034000 | -0.019364000 |
| 25 | -0.920534000 | 1.366044000  | -0.025734000 |
| 6  | -0.732008000 | 1.357372000  | 1.833215000  |
| 8  | -0.598848000 | 1.336443000  | 2.958860000  |
| 6  | -0.985473000 | 3.182617000  | -0.079253000 |
| 8  | -1.100440000 | 4.319791000  | -0.099516000 |
| 6  | -2.767169000 | 1.341042000  | 0.072129000  |
| 8  | -3.902670000 | 1.354985000  | 0.120129000  |
| 6  | -0.953045000 | 1.202401000  | -1.892087000 |
| 8  | -0.942446000 | 1.054276000  | -3.015956000 |
| 6  | -1.840757000 | -1.617319000 | -0.074765000 |
| 6  | -1.988321000 | -2.454837000 | -1.175073000 |
| 6  | -2.749653000 | -1.703975000 | 0.973364000  |
| 6  | -3.033746000 | -3.359920000 | -1.227514000 |
| 1  | -1.274143000 | -2.377070000 | -1.988383000 |
| 6  | -3.793342000 | -2.610009000 | 0.917121000  |
| 1  | -2.616563000 | -1.066500000 | 1.841703000  |
| 6  | -3.941112000 | -3.439107000 | -0.183483000 |
| 1  | -3.143216000 | -4.003862000 | -2.092634000 |
| 1  | -4.491868000 | -2.674089000 | 1.743292000  |
| 1  | -4.760720000 | -4.146462000 | -0.226176000 |
| 6  | 2.804872000  | -0.719201000 | -0.123518000 |
| 6  | 3.204020000  | -1.512346000 | -1.182329000 |
| 6  | 3.670956000  | -0.425955000 | 0.914934000  |
| 6  | 4.492828000  | -2.020197000 | -1.202461000 |
| 1  | 2.501022000  | -1.731477000 | -1.977920000 |
| 6  | 4.956820000  | -0.930961000 | 0.885852000  |
| 1  | 3.325026000  | 0.178019000  | 1.745829000  |
| 6  | 5.368692000  | -1.728254000 | -0.171722000 |
| 1  | 4.811160000  | -2.644969000 | -2.028284000 |
| 1  | 5.637710000  | -0.712015000 | 1.699534000  |
| 1  | 6.376072000  | -2.126973000 | -0.187793000 |

|   |             |              |              |
|---|-------------|--------------|--------------|
| 8 | 2.147856000 | 1.825357000  | -0.297870000 |
| 6 | 1.996075000 | 3.231522000  | -0.387068000 |
| 1 | 1.367825000 | 3.500072000  | -1.237256000 |
| 1 | 1.576724000 | 3.635392000  | 0.534988000  |
| 1 | 2.995616000 | 3.632870000  | -0.535036000 |
| 1 | 0.738358000 | -2.185408000 | 0.385147000  |
| 6 | 0.994922000 | -2.205197000 | 2.138386000  |
| 1 | 1.932785000 | -2.723857000 | 2.342403000  |
| 1 | 0.974865000 | -1.207733000 | 2.583257000  |
| 1 | 0.122342000 | -2.790902000 | 2.431689000  |

**3TS<sup>C-H</sup>** (TE = -2594.411983)

|   |              |              |              |
|---|--------------|--------------|--------------|
| 6 | 1.466094000  | 0.822009000  | 0.239651000  |
| 7 | 1.216552000  | -0.535668000 | 0.004009000  |
| 6 | 0.024009000  | -1.148069000 | -0.249554000 |
| 7 | -1.195407000 | -0.578687000 | -0.025713000 |
| 6 | -1.495043000 | 0.766034000  | 0.225884000  |
| 8 | 2.571126000  | 1.174841000  | 0.569045000  |
| 6 | 2.335551000  | -1.443796000 | 0.019410000  |
| 6 | 2.339845000  | -2.491271000 | 0.923480000  |
| 6 | 3.389156000  | -3.392770000 | 0.922838000  |
| 6 | 4.428955000  | -3.246004000 | 0.019211000  |
| 6 | 4.416676000  | -2.196489000 | -0.884916000 |
| 6 | 3.369174000  | -1.292411000 | -0.888256000 |
| 1 | 1.514114000  | -2.592851000 | 1.619072000  |
| 1 | 3.395059000  | -4.211547000 | 1.632496000  |
| 1 | 5.250406000  | -3.952640000 | 0.018134000  |
| 1 | 5.225684000  | -2.081802000 | -1.596413000 |
| 1 | 3.349138000  | -0.467553000 | -1.591182000 |
| 6 | -2.284088000 | -1.522723000 | -0.045005000 |
| 6 | -2.273669000 | -2.583747000 | 0.842877000  |
| 6 | -3.294748000 | -3.516549000 | 0.807594000  |
| 6 | -4.320903000 | -3.387333000 | -0.114042000 |
| 6 | -4.323094000 | -2.324159000 | -1.002233000 |
| 6 | -3.303815000 | -1.389108000 | -0.971148000 |
| 1 | -1.458756000 | -2.671502000 | 1.552910000  |
| 1 | -3.289408000 | -4.346129000 | 1.504590000  |
| 1 | -5.120227000 | -4.118352000 | -0.141899000 |
| 1 | -5.120973000 | -2.223175000 | -1.728236000 |
| 1 | -3.294329000 | -0.553867000 | -1.662202000 |



|    |              |              |              |
|----|--------------|--------------|--------------|
| 8  | -2.614531000 | 1.074913000  | 0.550504000  |
| 26 | -0.040148000 | 2.165288000  | 0.088386000  |
| 6  | -0.039216000 | 1.853507000  | -1.708985000 |
| 8  | -0.045160000 | 1.673003000  | -2.825954000 |
| 6  | -0.040614000 | 1.990378000  | 1.910561000  |
| 8  | -0.040739000 | 1.832140000  | 3.029665000  |
| 6  | 1.293110000  | 3.469723000  | 0.015872000  |
| 8  | 2.098883000  | 4.256828000  | -0.028600000 |
| 6  | -1.419530000 | 3.420426000  | 0.016813000  |
| 8  | -2.252970000 | 4.178367000  | -0.025003000 |
| 1  | 0.049564000  | -1.953418000 | -1.092508000 |
| 6  | 0.065597000  | -1.566417000 | -2.578411000 |
| 1  | 0.948728000  | -0.988461000 | -2.839142000 |
| 1  | 0.127381000  | -2.595104000 | -2.931463000 |
| 1  | -0.864309000 | -1.085302000 | -2.871315000 |

**III-TS<sup>C-H</sup> (TE = -995.263169)**

|   |              |              |              |
|---|--------------|--------------|--------------|
| 6 | 1.268242000  | 1.581953000  | -0.406827000 |
| 7 | 1.178668000  | 0.213669000  | -0.167719000 |
| 6 | -0.000009000 | -0.450245000 | 0.036618000  |
| 7 | -1.178668000 | 0.213707000  | -0.167717000 |
| 6 | -1.268242000 | 1.582014000  | -0.406667000 |
| 6 | 0.000037000  | 2.364768000  | -0.122670000 |
| 8 | 2.288699000  | 2.101285000  | -0.776923000 |
| 6 | 0.000156000  | 2.658980000  | 1.389979000  |
| 1 | -0.886759000 | 3.243275000  | 1.643845000  |
| 1 | 0.000317000  | 1.747502000  | 1.989912000  |
| 1 | 0.887006000  | 3.243457000  | 1.643658000  |
| 6 | 0.000010000  | 3.667578000  | -0.898659000 |
| 1 | -0.000171000 | 3.490391000  | -1.975067000 |
| 1 | -0.888097000 | 4.245883000  | -0.647895000 |
| 1 | 0.888277000  | 4.245754000  | -0.648165000 |
| 6 | 2.367350000  | -0.584767000 | -0.147587000 |
| 6 | 3.399511000  | -0.253987000 | 0.714503000  |
| 6 | 4.528412000  | -1.050715000 | 0.761936000  |
| 6 | 4.622173000  | -2.174986000 | -0.042923000 |
| 6 | 3.583099000  | -2.502276000 | -0.897947000 |
| 6 | 2.452212000  | -1.706403000 | -0.953110000 |
| 1 | 3.311194000  | 0.625121000  | 1.343139000  |
| 1 | 5.336926000  | -0.794997000 | 1.436146000  |

|   |              |              |              |
|---|--------------|--------------|--------------|
| 1 | 5.507489000  | -2.798273000 | -0.002032000 |
| 1 | 3.653566000  | -3.379265000 | -1.530209000 |
| 1 | 1.628900000  | -1.946883000 | -1.616162000 |
| 6 | -2.367359000 | -0.584717000 | -0.147602000 |
| 6 | -3.399410000 | -0.254101000 | 0.714681000  |
| 6 | -4.528316000 | -1.050825000 | 0.762081000  |
| 6 | -4.622187000 | -2.174924000 | -0.043004000 |
| 6 | -3.583220000 | -2.502050000 | -0.898223000 |
| 6 | -2.452329000 | -1.706182000 | -0.953352000 |
| 1 | -3.311005000 | 0.624879000  | 1.343483000  |
| 1 | -5.336749000 | -0.795237000 | 1.436438000  |
| 1 | -5.507506000 | -2.798207000 | -0.002140000 |
| 1 | -3.653776000 | -3.378904000 | -1.530661000 |
| 1 | -1.629098000 | -1.946529000 | -1.616554000 |
| 8 | -2.288741000 | 2.101416000  | -0.776550000 |
| 1 | -0.000042000 | -1.293009000 | 0.827115000  |
| 6 | -0.000095000 | -0.902546000 | 2.335006000  |
| 1 | 0.910132000  | -0.375803000 | 2.612936000  |
| 1 | -0.910123000 | -0.375388000 | 2.612805000  |
| 1 | -0.000357000 | -1.936410000 | 2.677851000  |

**IV-TS<sup>C-H</sup> (TE = -639.483317)**

|   |              |              |              |
|---|--------------|--------------|--------------|
| 6 | 0.741029000  | -1.340687000 | 0.358587000  |
| 6 | 2.223897000  | -0.951173000 | 0.269685000  |
| 6 | 2.288618000  | 0.393616000  | -0.471989000 |
| 6 | 0.918398000  | 0.967750000  | -0.248024000 |
| 7 | 0.084732000  | -0.042790000 | 0.026447000  |
| 1 | 2.813896000  | -1.731847000 | -0.219089000 |
| 1 | 2.626605000  | -0.822447000 | 1.279008000  |
| 6 | -1.318669000 | 0.118871000  | -0.080047000 |
| 6 | -1.869080000 | 0.381740000  | -1.328956000 |
| 6 | -3.233059000 | 0.555872000  | -1.468194000 |
| 6 | -4.061222000 | 0.466377000  | -0.359573000 |
| 6 | -3.515504000 | 0.213010000  | 0.886962000  |
| 6 | -2.147966000 | 0.043658000  | 1.031563000  |
| 1 | -1.203595000 | 0.447370000  | -2.183780000 |
| 1 | -3.653270000 | 0.757939000  | -2.446578000 |
| 1 | -5.130989000 | 0.600973000  | -0.467566000 |
| 1 | -4.156167000 | 0.158707000  | 1.759417000  |
| 1 | -1.717057000 | -0.120630000 | 2.011656000  |

|   |              |              |              |
|---|--------------|--------------|--------------|
| 6 | 2.414919000  | 0.183751000  | -1.986307000 |
| 1 | 2.462237000  | 1.146792000  | -2.499557000 |
| 1 | 3.328793000  | -0.373747000 | -2.212099000 |
| 1 | 1.568184000  | -0.369305000 | -2.397870000 |
| 6 | 3.440432000  | 1.267536000  | -0.018932000 |
| 1 | 4.390844000  | 0.828269000  | -0.335037000 |
| 1 | 3.366494000  | 2.261754000  | -0.468002000 |
| 1 | 3.463519000  | 1.385604000  | 1.064504000  |
| 6 | 0.333223000  | -2.399256000 | -0.652607000 |
| 1 | -0.747259000 | -2.563272000 | -0.626241000 |
| 1 | 0.609273000  | -2.116559000 | -1.670110000 |
| 1 | 0.821666000  | -3.347656000 | -0.417554000 |
| 6 | 0.392759000  | -1.821515000 | 1.757885000  |
| 1 | 1.024193000  | -2.677045000 | 2.012531000  |
| 1 | 0.569928000  | -1.035844000 | 2.496345000  |
| 1 | -0.647456000 | -2.146049000 | 1.829432000  |
| 1 | 0.753927000  | 2.011298000  | 0.247682000  |
| 6 | 1.022726000  | 2.144385000  | 1.775970000  |
| 1 | -0.012457000 | 2.297918000  | 2.083685000  |
| 1 | 1.473449000  | 1.311114000  | 2.312520000  |
| 1 | 1.619107000  | 3.052573000  | 1.865441000  |

Cartesian coordinates of the optimized geometries of the dihydrogen splitting product obtained for **1**, **3** and **IV**, along with their total energies (in hartrees) including zero point vibrational correction.

**1P<sup>H-H</sup>** (TE = -2369.054765)

|    |              |              |              |
|----|--------------|--------------|--------------|
| 6  | 0.413371000  | -1.306021000 | 0.401956000  |
| 6  | 1.131145000  | 0.871853000  | -0.271526000 |
| 7  | 1.462754000  | -0.380221000 | -0.028801000 |
| 7  | -0.839716000 | -0.769935000 | 0.032646000  |
| 25 | -0.831742000 | 1.302374000  | 0.110060000  |
| 6  | -0.359121000 | 1.174464000  | 1.909170000  |
| 8  | -0.037319000 | 1.077346000  | 2.993731000  |
| 6  | -0.743186000 | 3.113515000  | 0.147457000  |
| 8  | -0.753787000 | 4.257262000  | 0.193107000  |
| 6  | -2.616630000 | 1.441530000  | 0.574472000  |
| 8  | -3.695470000 | 1.585353000  | 0.903824000  |
| 6  | -1.141926000 | 1.244411000  | -1.736323000 |
| 8  | -1.281724000 | 1.173331000  | -2.859456000 |

|   |              |              |              |
|---|--------------|--------------|--------------|
| 6 | -1.883648000 | -1.650769000 | -0.019011000 |
| 6 | -3.097118000 | -1.312388000 | -0.649590000 |
| 6 | -1.807689000 | -2.953477000 | 0.517846000  |
| 6 | -4.144889000 | -2.203332000 | -0.737246000 |
| 1 | -3.203236000 | -0.334203000 | -1.102953000 |
| 6 | -2.865095000 | -3.840358000 | 0.416836000  |
| 1 | -0.917025000 | -3.272059000 | 1.046138000  |
| 6 | -4.047021000 | -3.482982000 | -0.207254000 |
| 1 | -5.054959000 | -1.893644000 | -1.240299000 |
| 1 | -2.759504000 | -4.829759000 | 0.850111000  |
| 1 | -4.872871000 | -4.179867000 | -0.278933000 |
| 6 | 2.805149000  | -0.879472000 | -0.034577000 |
| 6 | 3.286161000  | -1.551436000 | -1.144066000 |
| 6 | 3.588878000  | -0.713233000 | 1.094145000  |
| 6 | 4.574304000  | -2.056846000 | -1.123736000 |
| 1 | 2.647665000  | -1.672400000 | -2.012021000 |
| 6 | 4.875933000  | -1.222093000 | 1.108628000  |
| 1 | 3.180106000  | -0.185331000 | 1.950105000  |
| 6 | 5.367931000  | -1.892038000 | 0.000344000  |
| 1 | 4.959568000  | -2.582429000 | -1.989186000 |
| 1 | 5.495550000  | -1.095833000 | 1.988297000  |
| 1 | 6.375531000  | -2.290207000 | 0.013194000  |
| 8 | 2.169060000  | 1.576915000  | -0.662831000 |
| 6 | 2.024435000  | 2.942266000  | -1.016804000 |
| 1 | 1.204715000  | 3.081029000  | -1.722608000 |
| 1 | 1.864418000  | 3.555754000  | -0.130102000 |
| 1 | 2.960375000  | 3.230493000  | -1.489549000 |
| 1 | 0.620888000  | -2.272031000 | -0.083623000 |
| 1 | 0.559079000  | -1.470978000 | 1.491677000  |

**3P<sup>H-H</sup>** (TE = -2555.250956)

|   |              |              |              |
|---|--------------|--------------|--------------|
| 6 | 0.848098000  | -1.465453000 | -0.009484000 |
| 7 | -0.420664000 | -1.273455000 | 0.482975000  |
| 6 | -0.747271000 | -0.072394000 | 1.214716000  |
| 7 | -0.606418000 | 1.147624000  | 0.453180000  |
| 6 | 0.624669000  | 1.539318000  | -0.012278000 |
| 8 | 1.178585000  | -2.502095000 | -0.536759000 |
| 6 | -1.468994000 | -2.203794000 | 0.208449000  |
| 6 | -1.331680000 | -3.547604000 | 0.520827000  |
| 6 | -2.368198000 | -4.423756000 | 0.249793000  |

|    |              |              |              |
|----|--------------|--------------|--------------|
| 6  | -3.544129000 | -3.966617000 | -0.321683000 |
| 6  | -3.680007000 | -2.623129000 | -0.629382000 |
| 6  | -2.643250000 | -1.743816000 | -0.373276000 |
| 1  | -0.413532000 | -3.899648000 | 0.971822000  |
| 1  | -2.256260000 | -5.473374000 | 0.495210000  |
| 1  | -4.353502000 | -4.656779000 | -0.528012000 |
| 1  | -4.593491000 | -2.255823000 | -1.082014000 |
| 1  | -2.739657000 | -0.693483000 | -0.632323000 |
| 6  | -1.756507000 | 1.967112000  | 0.246774000  |
| 6  | -2.503365000 | 2.406703000  | 1.328729000  |
| 6  | -3.647321000 | 3.158501000  | 1.119179000  |
| 6  | -4.037773000 | 3.486156000  | -0.167659000 |
| 6  | -3.283482000 | 3.054046000  | -1.247425000 |
| 6  | -2.147561000 | 2.292609000  | -1.044116000 |
| 1  | -2.182310000 | 2.164418000  | 2.336227000  |
| 1  | -4.228961000 | 3.497518000  | 1.968267000  |
| 1  | -4.929809000 | 4.079115000  | -0.330532000 |
| 1  | -3.585684000 | 3.305339000  | -2.257220000 |
| 1  | -1.555609000 | 1.941899000  | -1.882250000 |
| 8  | 0.799208000  | 2.631159000  | -0.501889000 |
| 26 | 2.146806000  | 0.143951000  | -0.032915000 |
| 6  | 1.632599000  | 0.118315000  | -1.791867000 |
| 8  | 1.258904000  | 0.108426000  | -2.858894000 |
| 6  | 2.208021000  | 0.143789000  | 1.781377000  |
| 8  | 2.280868000  | 0.144559000  | 2.913742000  |
| 6  | 3.494630000  | -1.123352000 | -0.197789000 |
| 8  | 4.308687000  | -1.898210000 | -0.298326000 |
| 6  | 3.293197000  | 1.597540000  | -0.190197000 |
| 8  | 3.985498000  | 2.483534000  | -0.283709000 |
| 1  | -1.783551000 | -0.151057000 | 1.534981000  |
| 1  | -0.149085000 | -0.024042000 | 2.127102000  |

**IVP<sup>H-H</sup>** (TE = -600.325466)

|   |              |              |              |
|---|--------------|--------------|--------------|
| 6 | -0.836577000 | 1.216716000  | 0.224198000  |
| 6 | -2.259154000 | 0.707244000  | 0.518746000  |
| 6 | -2.369445000 | -0.697062000 | -0.066468000 |
| 6 | -0.950329000 | -1.191846000 | 0.151062000  |
| 7 | -0.112048000 | -0.039614000 | -0.109202000 |
| 1 | -3.022065000 | 1.389500000  | 0.132449000  |
| 1 | -2.400915000 | 0.643556000  | 1.603275000  |

|   |              |              |              |
|---|--------------|--------------|--------------|
| 6 | 1.262885000  | -0.188794000 | -0.078014000 |
| 6 | 2.146567000  | 0.869987000  | -0.339954000 |
| 6 | 3.514129000  | 0.681880000  | -0.333709000 |
| 6 | 4.068167000  | -0.561668000 | -0.074803000 |
| 6 | 3.212237000  | -1.616517000 | 0.183541000  |
| 6 | 1.840061000  | -1.440209000 | 0.189004000  |
| 1 | 1.765338000  | 1.854407000  | -0.567137000 |
| 1 | 4.157730000  | 1.529159000  | -0.544276000 |
| 1 | 5.141885000  | -0.702943000 | -0.075933000 |
| 1 | 3.612702000  | -2.602175000 | 0.394740000  |
| 1 | 1.211371000  | -2.291711000 | 0.411202000  |
| 6 | -2.709205000 | -0.690217000 | -1.551030000 |
| 1 | -2.832493000 | -1.714179000 | -1.914944000 |
| 1 | -3.645299000 | -0.154594000 | -1.732775000 |
| 1 | -1.925354000 | -0.222295000 | -2.148435000 |
| 6 | -3.386362000 | -1.541670000 | 0.676053000  |
| 1 | -4.394879000 | -1.141375000 | 0.539186000  |
| 1 | -3.386032000 | -2.570790000 | 0.305159000  |
| 1 | -3.175020000 | -1.566954000 | 1.748363000  |
| 6 | -0.868425000 | 2.207650000  | -0.934990000 |
| 1 | 0.121124000  | 2.566664000  | -1.214929000 |
| 1 | -1.326927000 | 1.767769000  | -1.821371000 |
| 1 | -1.463293000 | 3.078364000  | -0.646243000 |
| 6 | -0.277423000 | 1.883579000  | 1.474538000  |
| 1 | -0.959034000 | 2.673641000  | 1.800210000  |
| 1 | -0.189912000 | 1.154042000  | 2.284668000  |
| 1 | 0.703120000  | 2.333140000  | 1.315868000  |
| 1 | -0.830728000 | -1.559651000 | 1.186708000  |
| 1 | -0.699732000 | -2.020715000 | -0.520414000 |

Cartesian coordinates of the optimized geometries of the N-H bond splitting product obtained for **1**, **3** and **III-IV**, along with their total energies (in hartrees) including zero point vibrational correction.

**1P<sup>N-H</sup>** (TE = -2424.386095)

|    |              |              |              |
|----|--------------|--------------|--------------|
| 6  | -0.438975000 | -1.349226000 | 0.073300000  |
| 6  | -1.146685000 | 0.969883000  | -0.091203000 |
| 7  | -1.508755000 | -0.295411000 | -0.069974000 |
| 7  | 0.757429000  | -0.741855000 | -0.378744000 |
| 25 | 0.854845000  | 1.287380000  | 0.105434000  |
| 6  | 0.908827000  | 1.553978000  | -1.743584000 |

|   |              |              |              |
|---|--------------|--------------|--------------|
| 8 | 0.906239000  | 1.659123000  | -2.873376000 |
| 6 | 0.857397000  | 3.054525000  | 0.514709000  |
| 8 | 0.925795000  | 4.162677000  | 0.795660000  |
| 6 | 2.696561000  | 1.311457000  | 0.278110000  |
| 8 | 3.823567000  | 1.375358000  | 0.415119000  |
| 6 | 0.668915000  | 0.770756000  | 1.885398000  |
| 8 | 0.537311000  | 0.409657000  | 2.954454000  |
| 6 | 1.909323000  | -1.519906000 | -0.248063000 |
| 6 | 2.111087000  | -2.457095000 | 0.772296000  |
| 6 | 2.946893000  | -1.351657000 | -1.172349000 |
| 6 | 3.295221000  | -3.167071000 | 0.868121000  |
| 1 | 1.331415000  | -2.635867000 | 1.504169000  |
| 6 | 4.129637000  | -2.056326000 | -1.069460000 |
| 1 | 2.801810000  | -0.649237000 | -1.987411000 |
| 6 | 4.318007000  | -2.971975000 | -0.044803000 |
| 1 | 3.418797000  | -3.882881000 | 1.674025000  |
| 1 | 4.910446000  | -1.896352000 | -1.805167000 |
| 1 | 5.243047000  | -3.530317000 | 0.034350000  |
| 6 | -2.871210000 | -0.725695000 | -0.033873000 |
| 6 | -3.439512000 | -1.062153000 | 1.183177000  |
| 6 | -3.597644000 | -0.837293000 | -1.207364000 |
| 6 | -4.747428000 | -1.516306000 | 1.224201000  |
| 1 | -2.853031000 | -0.962371000 | 2.090745000  |
| 6 | -4.905457000 | -1.285501000 | -1.160163000 |
| 1 | -3.128128000 | -0.568913000 | -2.147364000 |
| 6 | -5.480026000 | -1.626914000 | 0.054392000  |
| 1 | -5.195518000 | -1.780550000 | 2.174568000  |
| 1 | -5.477936000 | -1.372320000 | -2.075923000 |
| 1 | -6.503524000 | -1.980773000 | 0.088175000  |
| 8 | -2.186470000 | 1.769335000  | -0.210242000 |
| 6 | -2.019046000 | 3.174110000  | -0.293576000 |
| 1 | -1.730478000 | 3.586890000  | 0.673133000  |
| 1 | -1.280202000 | 3.439814000  | -1.050435000 |
| 1 | -2.988788000 | 3.574759000  | -0.579916000 |
| 1 | -0.475642000 | -1.622500000 | 1.149671000  |
| 7 | -0.728073000 | -2.533234000 | -0.658979000 |
| 1 | -1.565926000 | -3.012167000 | -0.357731000 |
| 1 | -0.748513000 | -2.352976000 | -1.655359000 |

**3P<sup>N-H</sup>**(TE = -2610.576532)

|    |              |              |              |
|----|--------------|--------------|--------------|
| 6  | 1.488146000  | 0.738890000  | 0.104944000  |
| 7  | 1.229779000  | -0.597018000 | -0.054754000 |
| 6  | 0.021029000  | -1.200879000 | -0.619917000 |
| 7  | -1.214021000 | -0.625875000 | -0.132852000 |
| 6  | -1.513632000 | 0.703463000  | -0.002212000 |
| 8  | 2.610596000  | 1.127074000  | 0.347688000  |
| 6  | 2.330500000  | -1.514101000 | 0.025000000  |
| 6  | 2.357305000  | -2.440988000 | 1.053985000  |
| 6  | 3.388249000  | -3.361962000 | 1.125480000  |
| 6  | 4.394077000  | -3.350778000 | 0.173161000  |
| 6  | 4.366680000  | -2.419367000 | -0.852435000 |
| 6  | 3.334116000  | -1.501408000 | -0.930207000 |
| 1  | 1.564096000  | -2.429224000 | 1.795427000  |
| 1  | 3.408800000  | -4.086003000 | 1.931312000  |
| 1  | 5.203392000  | -4.068884000 | 0.231453000  |
| 1  | 5.153912000  | -2.407331000 | -1.596897000 |
| 1  | 3.303382000  | -0.762552000 | -1.723238000 |
| 6  | -2.291116000 | -1.572212000 | -0.035763000 |
| 6  | -2.388731000 | -2.347198000 | 1.107076000  |
| 6  | -3.403505000 | -3.282667000 | 1.218516000  |
| 6  | -4.318943000 | -3.433223000 | 0.190268000  |
| 6  | -4.217940000 | -2.651234000 | -0.949692000 |
| 6  | -3.201403000 | -1.720130000 | -1.066964000 |
| 1  | -1.664879000 | -2.204862000 | 1.904327000  |
| 1  | -3.482601000 | -3.889591000 | 2.112694000  |
| 1  | -5.116095000 | -4.162121000 | 0.277806000  |
| 1  | -4.934748000 | -2.768988000 | -1.753769000 |
| 1  | -3.103123000 | -1.102864000 | -1.951968000 |
| 8  | -2.657290000 | 1.061156000  | 0.177243000  |
| 26 | -0.030415000 | 2.099258000  | 0.103193000  |
| 6  | 0.050652000  | 2.024889000  | -1.699326000 |
| 8  | 0.107383000  | 1.941233000  | -2.831128000 |
| 6  | -0.098006000 | 1.593095000  | 1.856816000  |
| 8  | -0.139419000 | 1.201629000  | 2.918206000  |
| 6  | 1.293443000  | 3.401752000  | 0.296305000  |
| 8  | 2.081372000  | 4.200575000  | 0.410221000  |
| 6  | -1.398695000 | 3.368361000  | 0.175621000  |
| 8  | -2.213958000 | 4.146533000  | 0.214263000  |
| 1  | 0.030727000  | -2.226352000 | -0.241251000 |



|   |             |              |              |
|---|-------------|--------------|--------------|
| 7 | 0.002028000 | -1.313640000 | -2.053776000 |
| 1 | 0.102411000 | -0.419104000 | -2.516672000 |
| 1 | 0.738189000 | -1.928497000 | -2.378461000 |

**III<sup>N-H</sup>** (TE = -1011.428065)

|   |              |              |              |
|---|--------------|--------------|--------------|
| 6 | 1.280865000  | 1.522222000  | -0.304606000 |
| 7 | 1.197704000  | 0.178881000  | -0.064188000 |
| 6 | -0.000081000 | -0.529935000 | 0.325557000  |
| 7 | -1.194111000 | 0.180343000  | -0.125750000 |
| 6 | -1.277269000 | 1.528488000  | -0.339244000 |
| 6 | 0.001120000  | 2.328892000  | -0.158796000 |
| 8 | 2.330378000  | 2.056794000  | -0.582347000 |
| 6 | -0.019159000 | 2.884606000  | 1.273585000  |
| 1 | -0.906166000 | 3.505488000  | 1.410951000  |
| 1 | -0.035159000 | 2.093956000  | 2.028306000  |
| 1 | 0.869938000  | 3.495136000  | 1.440616000  |
| 6 | 0.017361000  | 3.487840000  | -1.143656000 |
| 1 | 0.035122000  | 3.131119000  | -2.175057000 |
| 1 | -0.874670000 | 4.097353000  | -1.008104000 |
| 1 | 0.903934000  | 4.098051000  | -0.978744000 |
| 6 | 2.400595000  | -0.596884000 | -0.054108000 |
| 6 | 3.301150000  | -0.462679000 | 0.988452000  |
| 6 | 4.455689000  | -1.222559000 | 0.998158000  |
| 6 | 4.705160000  | -2.120664000 | -0.028155000 |
| 6 | 3.800660000  | -2.253619000 | -1.067577000 |
| 6 | 2.646944000  | -1.487231000 | -1.083796000 |
| 1 | 3.084952000  | 0.241294000  | 1.784396000  |
| 1 | 5.162961000  | -1.117274000 | 1.812211000  |
| 1 | 5.609618000  | -2.717415000 | -0.017737000 |
| 1 | 3.995966000  | -2.950028000 | -1.874373000 |
| 1 | 1.936111000  | -1.569206000 | -1.899337000 |
| 6 | -2.395866000 | -0.592012000 | -0.099239000 |
| 6 | -3.326062000 | -0.390496000 | 0.908649000  |
| 6 | -4.472490000 | -1.162482000 | 0.950507000  |
| 6 | -4.686354000 | -2.140723000 | -0.007960000 |
| 6 | -3.754053000 | -2.342176000 | -1.011592000 |
| 6 | -2.608583000 | -1.565419000 | -1.060673000 |
| 1 | -3.145102000 | 0.382485000  | 1.648200000  |
| 1 | -5.202002000 | -1.000798000 | 1.735104000  |
| 1 | -5.584567000 | -2.745735000 | 0.026509000  |

|   |              |              |              |
|---|--------------|--------------|--------------|
| 1 | -3.921587000 | -3.101516000 | -1.766044000 |
| 1 | -1.877767000 | -1.702934000 | -1.850383000 |
| 8 | -2.322315000 | 2.070209000  | -0.621892000 |
| 1 | 0.002119000  | -1.489173000 | -0.205021000 |
| 7 | 0.031434000  | -0.847259000 | 1.724976000  |
| 1 | -0.110090000 | -0.025491000 | 2.301514000  |
| 1 | -0.671078000 | -1.536107000 | 1.962604000  |

**IVP<sup>N-H</sup>(TE = -655.652774)**

|   |              |              |              |
|---|--------------|--------------|--------------|
| 6 | -0.664109000 | 1.346511000  | -0.321000000 |
| 6 | -2.138854000 | 0.987363000  | -0.594809000 |
| 6 | -2.390305000 | -0.383481000 | 0.023085000  |
| 6 | -0.999681000 | -1.017466000 | -0.151367000 |
| 7 | -0.108113000 | 0.069275000  | 0.206275000  |
| 1 | -2.303716000 | 0.929854000  | -1.676012000 |
| 1 | -2.821904000 | 1.749236000  | -0.207938000 |
| 6 | 1.284645000  | -0.140472000 | 0.131711000  |
| 6 | 1.859129000  | -1.014506000 | -0.789052000 |
| 6 | 3.231484000  | -1.177656000 | -0.847859000 |
| 6 | 4.063110000  | -0.468101000 | 0.003171000  |
| 6 | 3.502021000  | 0.394977000  | 0.929579000  |
| 6 | 2.128520000  | 0.546575000  | 1.001851000  |
| 1 | 1.224772000  | -1.576000000 | -1.464320000 |
| 1 | 3.655613000  | -1.865293000 | -1.571200000 |
| 1 | 5.137833000  | -0.597351000 | -0.046369000 |
| 1 | 4.136685000  | 0.942021000  | 1.617786000  |
| 1 | 1.690188000  | 1.186429000  | 1.758525000  |
| 6 | -3.455362000 | -1.160719000 | -0.723710000 |
| 1 | -3.575461000 | -2.166279000 | -0.308055000 |
| 1 | -4.424826000 | -0.660167000 | -0.650363000 |
| 1 | -3.206539000 | -1.258236000 | -1.784243000 |
| 6 | -2.779897000 | -0.271500000 | 1.489175000  |
| 1 | -3.688493000 | 0.328524000  | 1.587546000  |
| 1 | -2.990078000 | -1.253853000 | 1.921187000  |
| 1 | -1.996354000 | 0.199970000  | 2.085786000  |
| 6 | 0.016129000  | 1.763170000  | -1.618454000 |
| 1 | 1.057977000  | 2.049450000  | -1.455509000 |
| 1 | -0.003581000 | 0.949777000  | -2.349321000 |
| 1 | -0.507127000 | 2.619601000  | -2.051836000 |
| 6 | -0.547914000 | 2.475409000  | 0.690084000  |

|   |              |              |              |
|---|--------------|--------------|--------------|
| 1 | -1.060909000 | 3.363402000  | 0.310630000  |
| 1 | -1.000620000 | 2.199947000  | 1.645036000  |
| 1 | 0.493755000  | 2.749559000  | 0.866399000  |
| 1 | -0.913172000 | -1.299511000 | -1.221912000 |
| 7 | -0.677640000 | -2.194008000 | 0.610449000  |
| 1 | -0.797677000 | -2.022150000 | 1.602035000  |
| 1 | -1.259592000 | -2.976434000 | 0.340639000  |

Cartesian coordinates of the optimized geometries for the P – H bond splitting product obtained for **1**, **3** and **III-IV**, along with their total energies (in hartrees) including zero point vibrational correction.

**1P<sup>P-H</sup>** (TE = -2710.984482)

|    |              |              |              |
|----|--------------|--------------|--------------|
| 6  | 0.451552000  | -1.211534000 | -0.057482000 |
| 6  | 1.066153000  | 1.111524000  | 0.063798000  |
| 7  | 1.463838000  | -0.150093000 | 0.021385000  |
| 7  | -0.802833000 | -0.660035000 | 0.296984000  |
| 25 | -0.942221000 | 1.395086000  | -0.069852000 |
| 6  | -0.962096000 | 1.552986000  | 1.794754000  |
| 8  | -0.936439000 | 1.574195000  | 2.928564000  |
| 6  | -0.983604000 | 3.176441000  | -0.404917000 |
| 8  | -1.085236000 | 4.292317000  | -0.641256000 |
| 6  | -2.785574000 | 1.430012000  | -0.208680000 |
| 8  | -3.913777000 | 1.519602000  | -0.322110000 |
| 6  | -0.773411000 | 0.898697000  | -1.858264000 |
| 8  | -0.636242000 | 0.502454000  | -2.913721000 |
| 6  | -1.909575000 | -1.477415000 | 0.097905000  |
| 6  | -1.987374000 | -2.468550000 | -0.890947000 |
| 6  | -3.021894000 | -1.335725000 | 0.940204000  |
| 6  | -3.120631000 | -3.252365000 | -1.035456000 |
| 1  | -1.155373000 | -2.629713000 | -1.567658000 |
| 6  | -4.150386000 | -2.113236000 | 0.787328000  |
| 1  | -2.972444000 | -0.602519000 | 1.739008000  |
| 6  | -4.213852000 | -3.081888000 | -0.205595000 |
| 1  | -3.144964000 | -4.005694000 | -1.815677000 |
| 1  | -4.987475000 | -1.972781000 | 1.462518000  |
| 1  | -5.097419000 | -3.697748000 | -0.321177000 |
| 6  | 2.844994000  | -0.529188000 | -0.086937000 |
| 6  | 3.330544000  | -0.942275000 | -1.314804000 |
| 6  | 3.663319000  | -0.505935000 | 1.029453000  |

|    |              |              |              |
|----|--------------|--------------|--------------|
| 6  | 4.648768000  | -1.352383000 | -1.422125000 |
| 1  | 2.673341000  | -0.941427000 | -2.178109000 |
| 6  | 4.980043000  | -0.911793000 | 0.914566000  |
| 1  | 3.257646000  | -0.176436000 | 1.979640000  |
| 6  | 5.472033000  | -1.338546000 | -0.309103000 |
| 1  | 5.033169000  | -1.681001000 | -2.380164000 |
| 1  | 5.624037000  | -0.899780000 | 1.785596000  |
| 1  | 6.502814000  | -1.660994000 | -0.394702000 |
| 8  | 2.094700000  | 1.926612000  | 0.136096000  |
| 6  | 1.912476000  | 3.328232000  | 0.237398000  |
| 1  | 1.569293000  | 3.742589000  | -0.710439000 |
| 1  | 1.209710000  | 3.576082000  | 1.033636000  |
| 1  | 2.890223000  | 3.740079000  | 0.476561000  |
| 1  | 0.520529000  | -1.616229000 | -1.088090000 |
| 15 | 1.030205000  | -2.643602000 | 1.076960000  |
| 1  | 0.855594000  | -1.878836000 | 2.263265000  |
| 1  | -0.256224000 | -3.231607000 | 1.151955000  |

**3P<sup>P-H</sup>** (TE = -2897.176864)

|   |              |              |              |
|---|--------------|--------------|--------------|
| 6 | -0.874926000 | -1.435556000 | -0.179497000 |
| 7 | 0.469440000  | -1.255785000 | 0.015291000  |
| 6 | 1.110725000  | -0.080536000 | 0.574065000  |
| 7 | 0.649652000  | 1.187365000  | 0.057473000  |
| 6 | -0.668249000 | 1.572765000  | -0.022314000 |
| 8 | -1.314000000 | -2.525953000 | -0.474204000 |
| 6 | 1.337020000  | -2.392228000 | -0.120084000 |
| 6 | 2.229799000  | -2.429660000 | -1.178602000 |
| 6 | 3.096634000  | -3.500416000 | -1.310435000 |
| 6 | 3.063514000  | -4.534445000 | -0.389059000 |
| 6 | 2.163414000  | -4.496644000 | 0.663474000  |
| 6 | 1.299852000  | -3.424269000 | 0.802382000  |
| 1 | 2.230751000  | -1.617267000 | -1.898847000 |
| 1 | 3.794165000  | -3.530365000 | -2.139042000 |
| 1 | 3.739837000  | -5.374560000 | -0.493584000 |
| 1 | 2.134336000  | -5.306048000 | 1.383164000  |
| 1 | 0.590454000  | -3.380097000 | 1.620682000  |
| 6 | 1.674573000  | 2.178832000  | -0.099587000 |
| 6 | 2.552582000  | 2.054280000  | -1.164525000 |
| 6 | 3.571879000  | 2.974929000  | -1.331344000 |
| 6 | 3.706289000  | 4.025935000  | -0.439043000 |

|    |              |              |              |
|----|--------------|--------------|--------------|
| 6  | 2.821161000  | 4.152668000  | 0.619273000  |
| 6  | 1.805135000  | 3.229116000  | 0.794129000  |
| 1  | 2.420948000  | 1.234171000  | -1.863954000 |
| 1  | 4.256187000  | 2.876316000  | -2.165590000 |
| 1  | 4.500608000  | 4.751030000  | -0.570919000 |
| 1  | 2.922006000  | 4.976412000  | 1.315983000  |
| 1  | 1.104542000  | 3.321413000  | 1.615481000  |
| 8  | -0.959012000 | 2.737663000  | -0.183792000 |
| 26 | -2.143311000 | 0.161513000  | -0.162751000 |
| 6  | -2.178953000 | -0.019866000 | 1.643191000  |
| 8  | -2.226303000 | -0.165830000 | 2.766761000  |
| 6  | -1.600833000 | 0.240433000  | -1.905001000 |
| 8  | -1.189160000 | 0.277161000  | -2.958885000 |
| 6  | -3.510411000 | -1.077290000 | -0.439419000 |
| 8  | -4.348229000 | -1.812032000 | -0.612580000 |
| 6  | -3.330008000 | 1.601822000  | -0.214565000 |
| 8  | -4.060216000 | 2.460848000  | -0.241786000 |
| 1  | 2.156745000  | -0.158784000 | 0.268886000  |
| 15 | 1.245033000  | -0.179113000 | 2.476508000  |
| 1  | 2.285962000  | 0.780730000  | 2.557931000  |
| 1  | 0.240581000  | 0.779265000  | 2.761994000  |

**III<sup>P-H</sup>** (TE = -1298.028077)

|   |              |              |              |
|---|--------------|--------------|--------------|
| 6 | 1.274542000  | 1.594934000  | -0.370912000 |
| 7 | 1.192083000  | 0.246713000  | -0.139165000 |
| 6 | 0.002352000  | -0.402866000 | 0.357068000  |
| 7 | -1.201294000 | 0.248041000  | -0.110744000 |
| 6 | -1.285951000 | 1.578345000  | -0.418376000 |
| 6 | -0.015340000 | 2.396657000  | -0.245807000 |
| 8 | 2.318200000  | 2.131804000  | -0.665215000 |
| 6 | -0.063450000 | 3.017576000  | 1.157932000  |
| 1 | -0.930200000 | 3.677120000  | 1.228600000  |
| 1 | -0.143158000 | 2.268088000  | 1.947694000  |
| 1 | 0.840604000  | 3.605056000  | 1.328699000  |
| 6 | 0.003489000  | 3.514422000  | -1.279075000 |
| 1 | 0.052192000  | 3.116457000  | -2.294233000 |
| 1 | -0.902897000 | 4.110742000  | -1.188550000 |
| 1 | 0.874102000  | 4.148291000  | -1.118681000 |
| 6 | 2.368901000  | -0.560779000 | -0.203446000 |
| 6 | 3.439693000  | -0.315821000 | 0.641261000  |

|    |              |              |              |
|----|--------------|--------------|--------------|
| 6  | 4.558714000  | -1.126269000 | 0.580283000  |
| 6  | 4.606960000  | -2.183503000 | -0.314309000 |
| 6  | 3.534279000  | -2.426668000 | -1.155446000 |
| 6  | 2.416123000  | -1.612622000 | -1.104107000 |
| 1  | 3.389829000  | 0.514015000  | 1.336337000  |
| 1  | 5.397426000  | -0.932361000 | 1.238197000  |
| 1  | 5.484463000  | -2.817599000 | -0.357633000 |
| 1  | 3.570261000  | -3.246991000 | -1.862292000 |
| 1  | 1.577055000  | -1.782848000 | -1.771502000 |
| 6  | -2.373761000 | -0.567141000 | -0.170856000 |
| 6  | -3.408413000 | -0.368186000 | 0.727809000  |
| 6  | -4.531470000 | -1.172979000 | 0.666993000  |
| 6  | -4.616630000 | -2.178059000 | -0.283157000 |
| 6  | -3.579041000 | -2.375083000 | -1.179039000 |
| 6  | -2.457260000 | -1.566258000 | -1.126698000 |
| 1  | -3.324216000 | 0.422057000  | 1.465467000  |
| 1  | -5.343040000 | -1.016506000 | 1.367418000  |
| 1  | -5.496619000 | -2.808748000 | -0.326823000 |
| 1  | -3.646285000 | -3.154818000 | -1.928270000 |
| 1  | -1.645079000 | -1.696401000 | -1.835227000 |
| 8  | -2.322366000 | 2.086941000  | -0.781161000 |
| 1  | -0.006976000 | -1.418335000 | -0.051405000 |
| 15 | -0.046795000 | -0.700818000 | 2.241744000  |
| 1  | 1.063397000  | -1.583248000 | 2.238670000  |
| 1  | 0.746469000  | 0.420847000  | 2.597043000  |

**IVP<sup>P-H</sup> (TE = -942.258789)**

|   |              |              |              |
|---|--------------|--------------|--------------|
| 6 | -0.557400000 | 1.592034000  | -0.159762000 |
| 6 | -2.045014000 | 1.344537000  | -0.465260000 |
| 6 | -2.360381000 | -0.100365000 | -0.077206000 |
| 6 | -0.997883000 | -0.757876000 | -0.346414000 |
| 7 | -0.059683000 | 0.221281000  | 0.166497000  |
| 1 | -2.222335000 | 1.470990000  | -1.538438000 |
| 1 | -2.692595000 | 2.057471000  | 0.053533000  |
| 6 | 1.327562000  | -0.018109000 | 0.071131000  |
| 6 | 1.903355000  | -0.647349000 | -1.031229000 |
| 6 | 3.270061000  | -0.855796000 | -1.093904000 |
| 6 | 4.092224000  | -0.428191000 | -0.064487000 |
| 6 | 3.530755000  | 0.195548000  | 1.037609000  |
| 6 | 2.162142000  | 0.386961000  | 1.109940000  |

|    |              |              |              |
|----|--------------|--------------|--------------|
| 1  | 1.274414000  | -0.972856000 | -1.852914000 |
| 1  | 3.696462000  | -1.349948000 | -1.959667000 |
| 1  | 5.162450000  | -0.589499000 | -0.116356000 |
| 1  | 4.160625000  | 0.518458000  | 1.858774000  |
| 1  | 1.714890000  | 0.834882000  | 1.989849000  |
| 6  | -3.461932000 | -0.682246000 | -0.941221000 |
| 1  | -3.659104000 | -1.727137000 | -0.686595000 |
| 1  | -4.391340000 | -0.123818000 | -0.798243000 |
| 1  | -3.200491000 | -0.633904000 | -2.002003000 |
| 6  | -2.761229000 | -0.193913000 | 1.389563000  |
| 1  | -3.642774000 | 0.426009000  | 1.573971000  |
| 1  | -3.020510000 | -1.219817000 | 1.667876000  |
| 1  | -1.961613000 | 0.145255000  | 2.050687000  |
| 6  | 0.135279000  | 2.170653000  | -1.386045000 |
| 1  | 1.192456000  | 2.372404000  | -1.196674000 |
| 1  | 0.063759000  | 1.487047000  | -2.236750000 |
| 1  | -0.343033000 | 3.111484000  | -1.670997000 |
| 6  | -0.370189000 | 2.537007000  | 1.014713000  |
| 1  | -0.814550000 | 3.508928000  | 0.783588000  |
| 1  | -0.847375000 | 2.145974000  | 1.915825000  |
| 1  | 0.688286000  | 2.701250000  | 1.227150000  |
| 1  | -0.920734000 | -0.897976000 | -1.444401000 |
| 15 | -0.869569000 | -2.479459000 | 0.356363000  |
| 1  | 0.431669000  | -2.772253000 | -0.120702000 |
| 1  | -0.411331000 | -2.107400000 | 1.646985000  |

Cartesian coordinates of the optimized geometries for the Si – H bond splitting product obtained for **1**, **3** and **III-IV**, along with their total energies (in hartrees) including zero point vibrational correction.

**1<sup>PSi-H</sup>** (TE = -2890.606666)

|    |              |              |              |
|----|--------------|--------------|--------------|
| 6  | 0.291036000  | 0.388584000  | 0.039629000  |
| 6  | -0.696978000 | -1.808270000 | 0.005393000  |
| 7  | 0.403982000  | -1.076658000 | 0.016424000  |
| 7  | -1.044180000 | 0.743517000  | -0.336985000 |
| 25 | -2.439408000 | -0.755737000 | 0.104934000  |
| 6  | -2.573729000 | -0.943578000 | -1.752373000 |
| 8  | -2.582776000 | -1.022118000 | -2.883879000 |
| 6  | -3.582182000 | -2.104212000 | 0.509236000  |
| 8  | -4.358804000 | -2.897956000 | 0.789106000  |

|    |              |              |              |
|----|--------------|--------------|--------------|
| 6  | -3.902132000 | 0.367636000  | 0.212622000  |
| 8  | -4.844366000 | 0.997470000  | 0.312700000  |
| 6  | -1.985846000 | -0.401605000 | 1.876988000  |
| 8  | -1.629258000 | -0.136141000 | 2.921962000  |
| 6  | -1.373661000 | 2.080466000  | -0.161398000 |
| 6  | -0.739285000 | 2.934929000  | 0.753277000  |
| 6  | -2.376847000 | 2.649223000  | -0.963010000 |
| 6  | -1.101277000 | 4.269381000  | 0.862297000  |
| 1  | 0.041801000  | 2.558706000  | 1.404166000  |
| 6  | -2.736228000 | 3.973279000  | -0.844675000 |
| 1  | -2.855882000 | 2.023536000  | -1.709358000 |
| 6  | -2.101725000 | 4.802856000  | 0.072914000  |
| 1  | -0.587867000 | 4.896275000  | 1.583735000  |
| 1  | -3.512316000 | 4.371617000  | -1.489256000 |
| 1  | -2.379484000 | 5.846161000  | 0.159825000  |
| 6  | 1.724692000  | -1.630618000 | 0.124426000  |
| 6  | 2.432523000  | -1.447017000 | 1.300704000  |
| 6  | 2.289968000  | -2.313077000 | -0.940259000 |
| 6  | 3.723318000  | -1.935305000 | 1.404756000  |
| 1  | 1.971490000  | -0.917697000 | 2.127657000  |
| 6  | 3.575254000  | -2.810912000 | -0.824666000 |
| 1  | 1.718193000  | -2.445185000 | -1.851464000 |
| 6  | 4.294562000  | -2.617154000 | 0.343727000  |
| 1  | 4.283527000  | -1.780819000 | 2.318989000  |
| 1  | 4.020249000  | -3.345148000 | -1.655634000 |
| 1  | 5.305850000  | -2.997244000 | 0.426352000  |
| 8  | -0.413527000 | -3.092948000 | -0.019580000 |
| 6  | -1.438034000 | -4.068531000 | -0.082963000 |
| 1  | -1.953981000 | -4.150548000 | 0.873683000  |
| 1  | -2.150587000 | -3.839497000 | -0.876183000 |
| 1  | -0.941427000 | -5.010627000 | -0.304204000 |
| 1  | 0.585246000  | 0.687753000  | 1.066361000  |
| 14 | 1.486675000  | 1.145472000  | -1.272839000 |
| 1  | 1.468403000  | 0.226015000  | -2.433484000 |
| 1  | 0.941764000  | 2.459439000  | -1.659825000 |
| 6  | 3.223220000  | 1.331219000  | -0.616656000 |
| 6  | 3.444084000  | 2.125167000  | 0.509955000  |
| 6  | 4.310542000  | 0.659637000  | -1.169396000 |
| 6  | 4.703973000  | 2.235918000  | 1.071478000  |
| 1  | 2.615037000  | 2.670191000  | 0.956628000  |



|   |             |             |              |
|---|-------------|-------------|--------------|
| 6 | 5.575576000 | 0.770806000 | -0.615575000 |
| 1 | 4.165381000 | 0.029554000 | -2.042246000 |
| 6 | 5.772790000 | 1.555431000 | 0.508298000  |
| 1 | 4.855568000 | 2.856395000 | 1.947492000  |
| 1 | 6.409225000 | 0.237819000 | -1.059264000 |
| 1 | 6.761119000 | 1.640133000 | 0.945530000  |

**3P<sup>Si-H</sup>** (TE = -3076.796167)

|    |              |              |              |
|----|--------------|--------------|--------------|
| 6  | -2.253708000 | 0.237905000  | -0.450026000 |
| 7  | -1.282737000 | 1.169738000  | -0.172857000 |
| 6  | 0.144145000  | 0.889477000  | -0.110748000 |
| 7  | 0.535873000  | -0.188779000 | 0.791207000  |
| 6  | -0.112643000 | -1.387246000 | 0.933159000  |
| 8  | -3.366275000 | 0.583873000  | -0.783764000 |
| 6  | -1.637306000 | 2.559506000  | -0.169190000 |
| 6  | -1.585817000 | 3.250449000  | 1.031529000  |
| 6  | -1.897040000 | 4.598234000  | 1.066361000  |
| 6  | -2.271023000 | 5.251518000  | -0.096721000 |
| 6  | -2.331938000 | 4.555229000  | -1.292914000 |
| 6  | -2.013507000 | 3.208860000  | -1.333083000 |
| 1  | -1.310282000 | 2.716016000  | 1.936075000  |
| 1  | -1.857635000 | 5.136509000  | 2.005927000  |
| 1  | -2.520084000 | 6.305724000  | -0.070094000 |
| 1  | -2.628297000 | 5.063579000  | -2.202765000 |
| 1  | -2.060373000 | 2.652344000  | -2.262400000 |
| 6  | 1.766392000  | 0.022661000  | 1.500745000  |
| 6  | 1.893905000  | 1.125803000  | 2.331650000  |
| 6  | 3.090807000  | 1.371339000  | 2.982253000  |
| 6  | 4.159060000  | 0.505422000  | 2.819843000  |
| 6  | 4.022193000  | -0.607606000 | 2.006108000  |
| 6  | 2.833218000  | -0.848192000 | 1.343402000  |
| 1  | 1.049999000  | 1.793808000  | 2.472293000  |
| 1  | 3.182699000  | 2.237724000  | 3.626523000  |
| 1  | 5.095737000  | 0.695441000  | 3.330295000  |
| 1  | 4.853944000  | -1.289051000 | 1.870294000  |
| 1  | 2.730909000  | -1.706084000 | 0.691291000  |
| 8  | 0.331599000  | -2.256504000 | 1.653401000  |
| 26 | -1.932999000 | -1.720472000 | 0.057295000  |
| 6  | -1.007629000 | -2.074407000 | -1.460972000 |
| 8  | -0.418133000 | -2.370180000 | -2.384271000 |

|    |              |              |              |
|----|--------------|--------------|--------------|
| 6  | -2.504614000 | -1.035374000 | 1.653267000  |
| 8  | -2.807483000 | -0.562125000 | 2.635748000  |
| 6  | -3.610245000 | -2.039025000 | -0.692278000 |
| 8  | -4.619300000 | -2.244036000 | -1.152997000 |
| 6  | -1.775028000 | -3.474574000 | 0.669433000  |
| 8  | -1.702461000 | -4.538596000 | 1.036913000  |
| 1  | 0.581866000  | 1.790867000  | 0.326992000  |
| 14 | 0.917773000  | 0.905353000  | -1.877000000 |
| 1  | 0.080604000  | 0.128452000  | -2.810608000 |
| 1  | 0.892461000  | 2.332859000  | -2.264210000 |
| 6  | 2.667774000  | 0.286976000  | -1.835524000 |
| 6  | 2.998893000  | -1.007224000 | -2.232373000 |
| 6  | 3.678206000  | 1.106491000  | -1.331229000 |
| 6  | 4.300086000  | -1.471185000 | -2.124817000 |
| 1  | 2.231665000  | -1.662743000 | -2.633928000 |
| 6  | 4.977863000  | 0.647290000  | -1.221569000 |
| 1  | 3.443304000  | 2.118929000  | -1.010817000 |
| 6  | 5.289085000  | -0.644266000 | -1.618233000 |
| 1  | 4.543237000  | -2.479707000 | -2.438971000 |
| 1  | 5.749818000  | 1.294502000  | -0.821396000 |
| 1  | 6.307272000  | -1.006397000 | -1.533316000 |

**III<sup>PSi-H</sup>** (TE = -1477.648329)

|   |              |              |              |
|---|--------------|--------------|--------------|
| 6 | -2.302752000 | 1.566253000  | 0.234020000  |
| 7 | -1.967231000 | 0.301473000  | -0.159610000 |
| 6 | -0.595625000 | -0.174764000 | -0.261909000 |
| 7 | 0.318298000  | 0.885889000  | -0.654872000 |
| 6 | 0.087959000  | 2.212556000  | -0.405047000 |
| 6 | -1.150868000 | 2.546272000  | 0.414641000  |
| 8 | -3.450987000 | 1.897705000  | 0.431693000  |
| 6 | -1.630998000 | 3.943310000  | 0.052898000  |
| 1 | -0.829879000 | 4.661858000  | 0.217946000  |
| 1 | -1.931275000 | 4.001416000  | -0.994680000 |
| 1 | -2.489180000 | 4.205964000  | 0.669343000  |
| 6 | -0.736777000 | 2.529034000  | 1.893064000  |
| 1 | -0.366121000 | 1.554076000  | 2.215506000  |
| 1 | 0.051889000  | 3.266432000  | 2.056015000  |
| 1 | -1.595085000 | 2.788794000  | 2.515889000  |
| 6 | -2.971824000 | -0.710594000 | -0.249871000 |
| 6 | -3.164291000 | -1.369098000 | -1.454130000 |

|    |              |              |              |
|----|--------------|--------------|--------------|
| 6  | -4.096457000 | -2.387970000 | -1.541478000 |
| 6  | -4.841184000 | -2.743412000 | -0.429129000 |
| 6  | -4.652754000 | -2.076937000 | 0.770748000  |
| 6  | -3.717043000 | -1.062449000 | 0.864630000  |
| 1  | -2.586389000 | -1.071995000 | -2.323408000 |
| 1  | -4.246726000 | -2.899961000 | -2.484438000 |
| 1  | -5.572829000 | -3.539576000 | -0.498275000 |
| 1  | -5.236087000 | -2.350092000 | 1.641920000  |
| 1  | -3.563335000 | -0.532380000 | 1.797423000  |
| 6  | 1.505436000  | 0.489332000  | -1.344231000 |
| 6  | 1.418324000  | -0.308018000 | -2.475424000 |
| 6  | 2.570336000  | -0.726380000 | -3.120228000 |
| 6  | 3.811369000  | -0.337367000 | -2.647483000 |
| 6  | 3.894726000  | 0.474840000  | -1.527323000 |
| 6  | 2.748852000  | 0.884778000  | -0.874077000 |
| 1  | 0.447149000  | -0.595196000 | -2.864439000 |
| 1  | 2.492895000  | -1.349743000 | -4.003102000 |
| 1  | 4.712820000  | -0.663284000 | -3.152565000 |
| 1  | 4.862214000  | 0.781574000  | -1.147434000 |
| 1  | 2.810489000  | 1.505622000  | 0.010755000  |
| 8  | 0.842763000  | 3.082071000  | -0.780519000 |
| 14 | -0.090649000 | -1.210980000 | 1.299120000  |
| 1  | -0.720240000 | -0.604824000 | 2.492237000  |
| 1  | -0.635559000 | -2.565866000 | 1.064156000  |
| 1  | -0.591713000 | -0.903233000 | -1.078675000 |
| 6  | 1.752236000  | -1.278849000 | 1.506011000  |
| 6  | 2.518941000  | -2.161771000 | 0.745723000  |
| 6  | 2.407021000  | -0.421471000 | 2.388559000  |
| 6  | 3.897186000  | -2.182940000 | 0.857515000  |
| 1  | 2.030964000  | -2.837868000 | 0.048093000  |
| 6  | 3.787217000  | -0.440265000 | 2.504943000  |
| 1  | 1.831639000  | 0.270153000  | 2.998003000  |
| 6  | 4.532262000  | -1.321002000 | 1.738326000  |
| 1  | 4.479423000  | -2.870274000 | 0.254617000  |
| 1  | 4.282192000  | 0.231204000  | 3.197015000  |
| 1  | 5.612389000  | -1.337358000 | 1.827908000  |

**IVP<sup>Si-H</sup>** (TE = -1121.878842)

|   |             |              |             |
|---|-------------|--------------|-------------|
| 6 | 2.548258000 | 1.001570000  | 0.473064000 |
| 6 | 3.346756000 | -0.297358000 | 0.675283000 |

|    |              |              |              |
|----|--------------|--------------|--------------|
| 6  | 2.566157000  | -1.432704000 | 0.003681000  |
| 6  | 1.125687000  | -0.913114000 | 0.154486000  |
| 7  | 1.277242000  | 0.506792000  | -0.124038000 |
| 1  | 3.430715000  | -0.510315000 | 1.746180000  |
| 1  | 4.365564000  | -0.216024000 | 0.283977000  |
| 6  | 0.137878000  | 1.344816000  | -0.078559000 |
| 6  | -0.788113000 | 1.288040000  | 0.961771000  |
| 6  | -1.898857000 | 2.111718000  | 0.965622000  |
| 6  | -2.100999000 | 3.016366000  | -0.064407000 |
| 6  | -1.186459000 | 3.085186000  | -1.102317000 |
| 6  | -0.080768000 | 2.251120000  | -1.112025000 |
| 1  | -0.641975000 | 0.581383000  | 1.771443000  |
| 1  | -2.614394000 | 2.043149000  | 1.777263000  |
| 1  | -2.973205000 | 3.659644000  | -0.061729000 |
| 1  | -1.341908000 | 3.780970000  | -1.919011000 |
| 1  | 0.623522000  | 2.270977000  | -1.936725000 |
| 6  | 2.785462000  | -2.750386000 | 0.721621000  |
| 1  | 2.214427000  | -3.560642000 | 0.260419000  |
| 1  | 3.842293000  | -3.030700000 | 0.687911000  |
| 1  | 2.490040000  | -2.681199000 | 1.772387000  |
| 6  | 2.975619000  | -1.574011000 | -1.457352000 |
| 1  | 4.048442000  | -1.773996000 | -1.528978000 |
| 1  | 2.457996000  | -2.408225000 | -1.941096000 |
| 1  | 2.759487000  | -0.666586000 | -2.024652000 |
| 6  | 2.330813000  | 1.693056000  | 1.812511000  |
| 1  | 1.771285000  | 2.625001000  | 1.699773000  |
| 1  | 1.786130000  | 1.046586000  | 2.506252000  |
| 1  | 3.296214000  | 1.931524000  | 2.266806000  |
| 6  | 3.239002000  | 1.962775000  | -0.478820000 |
| 1  | 4.192526000  | 2.292964000  | -0.057658000 |
| 1  | 3.433162000  | 1.488400000  | -1.443305000 |
| 1  | 2.626274000  | 2.851524000  | -0.649636000 |
| 1  | 0.823537000  | -1.112987000 | 1.206448000  |
| 14 | -0.157857000 | -1.734508000 | -0.979376000 |
| 1  | -0.029716000 | -1.200155000 | -2.354025000 |
| 1  | 0.110712000  | -3.193920000 | -0.971607000 |
| 6  | -1.905535000 | -1.448872000 | -0.392337000 |
| 6  | -2.796696000 | -0.665550000 | -1.121286000 |
| 6  | -2.334542000 | -1.973263000 | 0.826815000  |
| 6  | -4.070872000 | -0.403114000 | -0.645328000 |

|   |              |              |              |
|---|--------------|--------------|--------------|
| 1 | -2.484633000 | -0.239062000 | -2.070494000 |
| 6 | -3.604591000 | -1.711510000 | 1.310433000  |
| 1 | -1.660950000 | -2.593938000 | 1.413822000  |
| 6 | -4.474644000 | -0.922283000 | 0.573408000  |
| 1 | -4.747955000 | 0.215479000  | -1.223639000 |
| 1 | -3.919783000 | -2.124623000 | 2.262032000  |
| 1 | -5.469841000 | -0.714546000 | 0.949816000  |

Cartesian coordinates of the optimized geometries for the C – H bond splitting product obtained for **1**, **3** and **III-IV**, along with their total energies (in hartrees) including zero point vibrational correction.

**1P<sup>C-H</sup>** (TE = -2408.325357)

|    |              |              |              |
|----|--------------|--------------|--------------|
| 6  | -0.442926000 | -1.344360000 | -0.001685000 |
| 6  | -1.141184000 | 0.958996000  | -0.100625000 |
| 7  | -1.496677000 | -0.312692000 | -0.110898000 |
| 7  | 0.782560000  | -0.727661000 | -0.398186000 |
| 25 | 0.854588000  | 1.299038000  | 0.102507000  |
| 6  | 0.917140000  | 1.580116000  | -1.745569000 |
| 8  | 0.924411000  | 1.689526000  | -2.874699000 |
| 6  | 0.830121000  | 3.060020000  | 0.535918000  |
| 8  | 0.886235000  | 4.164245000  | 0.834911000  |
| 6  | 2.692839000  | 1.364860000  | 0.286674000  |
| 8  | 3.816766000  | 1.463032000  | 0.431264000  |
| 6  | 0.667017000  | 0.735188000  | 1.867892000  |
| 8  | 0.532224000  | 0.329487000  | 2.920369000  |
| 6  | 1.924372000  | -1.503941000 | -0.241149000 |
| 6  | 2.071000000  | -2.505840000 | 0.730236000  |
| 6  | 3.015917000  | -1.292340000 | -1.097218000 |
| 6  | 3.244140000  | -3.234497000 | 0.841440000  |
| 1  | 1.260529000  | -2.716291000 | 1.419476000  |
| 6  | 4.184324000  | -2.014235000 | -0.976336000 |
| 1  | 2.919311000  | -0.543713000 | -1.877448000 |
| 6  | 4.313396000  | -2.996331000 | -0.003080000 |
| 1  | 3.320013000  | -3.997588000 | 1.609032000  |
| 1  | 5.002823000  | -1.818043000 | -1.660579000 |
| 1  | 5.228644000  | -3.568636000 | 0.087481000  |
| 6  | -2.865488000 | -0.734573000 | -0.043925000 |
| 6  | -3.388630000 | -1.115855000 | 1.179312000  |
| 6  | -3.639046000 | -0.780079000 | -1.190379000 |

|   |              |              |              |
|---|--------------|--------------|--------------|
| 6 | -4.699480000 | -1.556685000 | 1.252963000  |
| 1 | -2.764696000 | -1.063999000 | 2.065719000  |
| 6 | -4.949428000 | -1.215693000 | -1.110105000 |
| 1 | -3.204522000 | -0.475101000 | -2.135825000 |
| 6 | -5.479173000 | -1.606827000 | 0.109743000  |
| 1 | -5.112755000 | -1.858131000 | 2.208017000  |
| 1 | -5.559165000 | -1.253659000 | -2.004876000 |
| 1 | -6.504744000 | -1.951293000 | 0.168676000  |
| 8 | -2.191607000 | 1.746685000  | -0.184129000 |
| 6 | -2.046539000 | 3.155091000  | -0.233978000 |
| 1 | -1.760702000 | 3.548604000  | 0.741497000  |
| 1 | -1.314668000 | 3.449430000  | -0.986942000 |
| 1 | -3.023597000 | 3.547214000  | -0.507002000 |
| 1 | -0.469695000 | -1.669172000 | 1.060834000  |
| 6 | -0.795256000 | -2.532588000 | -0.877198000 |
| 1 | -0.927228000 | -2.198201000 | -1.908828000 |
| 1 | 0.023563000  | -3.250555000 | -0.853166000 |
| 1 | -1.701931000 | -3.040690000 | -0.544467000 |

**3P<sup>C-H</sup>** (TE = -2594.518228)

|   |              |              |              |
|---|--------------|--------------|--------------|
| 6 | -1.524248000 | 0.565179000  | 0.365345000  |
| 7 | -1.223993000 | -0.768944000 | 0.286339000  |
| 6 | 0.044121000  | -1.394725000 | 0.631516000  |
| 7 | 1.227546000  | -0.728174000 | 0.106198000  |
| 6 | 1.486919000  | 0.616798000  | 0.137139000  |
| 8 | -2.674167000 | 0.944990000  | 0.305369000  |
| 6 | -2.295075000 | -1.697584000 | 0.065085000  |
| 6 | -2.336148000 | -2.385395000 | -1.137135000 |
| 6 | -3.341384000 | -3.306935000 | -1.371644000 |
| 6 | -4.310463000 | -3.532927000 | -0.407816000 |
| 6 | -4.271652000 | -2.836885000 | 0.789539000  |
| 6 | -3.263342000 | -1.919700000 | 1.030005000  |
| 1 | -1.575390000 | -2.183317000 | -1.885636000 |
| 1 | -3.372529000 | -3.843336000 | -2.312589000 |
| 1 | -5.100937000 | -4.250871000 | -0.591767000 |
| 1 | -5.031556000 | -3.008849000 | 1.542633000  |
| 1 | -3.225905000 | -1.363238000 | 1.959519000  |
| 6 | 2.296938000  | -1.621588000 | -0.236049000 |
| 6 | 2.206529000  | -2.348521000 | -1.412094000 |
| 6 | 3.210441000  | -3.238394000 | -1.752658000 |

|    |              |              |              |
|----|--------------|--------------|--------------|
| 6  | 4.308582000  | -3.393132000 | -0.922684000 |
| 6  | 4.400023000  | -2.658291000 | 0.248389000  |
| 6  | 3.394257000  | -1.773516000 | 0.595492000  |
| 1  | 1.345058000  | -2.203359000 | -2.057487000 |
| 1  | 3.138205000  | -3.805711000 | -2.673022000 |
| 1  | 5.097234000  | -4.086107000 | -1.190929000 |
| 1  | 5.260150000  | -2.774774000 | 0.897041000  |
| 1  | 3.456469000  | -1.188454000 | 1.505939000  |
| 8  | 2.601210000  | 1.036790000  | -0.091711000 |
| 26 | -0.036808000 | 1.964390000  | 0.323768000  |
| 6  | 0.103387000  | 1.778503000  | 2.121402000  |
| 8  | 0.191279000  | 1.667261000  | 3.247166000  |
| 6  | -0.167296000 | 1.598517000  | -1.459206000 |
| 8  | -0.246076000 | 1.284171000  | -2.544436000 |
| 6  | -1.401665000 | 3.234990000  | 0.394493000  |
| 8  | -2.212285000 | 4.018211000  | 0.436656000  |
| 6  | 1.279326000  | 3.280815000  | 0.190154000  |
| 8  | 2.060173000  | 4.091077000  | 0.112192000  |
| 1  | 0.022436000  | -2.361227000 | 0.120667000  |
| 6  | 0.157221000  | -1.673533000 | 2.118094000  |
| 1  | 0.187865000  | -0.752115000 | 2.698181000  |
| 1  | -0.697264000 | -2.264582000 | 2.452359000  |
| 1  | 1.065705000  | -2.242277000 | 2.323854000  |

**IIIP<sup>C-H</sup>** (TE = -995.369871)

|   |              |              |              |
|---|--------------|--------------|--------------|
| 6 | 1.281705000  | 1.525976000  | -0.316526000 |
| 7 | 1.200270000  | 0.183691000  | -0.072765000 |
| 6 | 0.000022000  | -0.509343000 | 0.362809000  |
| 7 | -1.200247000 | 0.183668000  | -0.072770000 |
| 6 | -1.281665000 | 1.525898000  | -0.316718000 |
| 6 | -0.000014000 | 2.333058000  | -0.180175000 |
| 8 | 2.328347000  | 2.061594000  | -0.607448000 |
| 6 | -0.000127000 | 2.960211000  | 1.221855000  |
| 1 | -0.888029000 | 3.583735000  | 1.340305000  |
| 1 | 0.000016000  | 2.208770000  | 2.014245000  |
| 1 | 0.887588000  | 3.584005000  | 1.340289000  |
| 6 | 0.000026000  | 3.445284000  | -1.219744000 |
| 1 | -0.000003000 | 3.041339000  | -2.233891000 |
| 1 | -0.889404000 | 4.061150000  | -1.097138000 |
| 1 | 0.889496000  | 4.061088000  | -1.097141000 |

|   |              |              |              |
|---|--------------|--------------|--------------|
| 6 | 2.397505000  | -0.597089000 | -0.070971000 |
| 6 | 3.372209000  | -0.369874000 | 0.887853000  |
| 6 | 4.518077000  | -1.143228000 | 0.899401000  |
| 6 | 4.688138000  | -2.148447000 | -0.039747000 |
| 6 | 3.711681000  | -2.374946000 | -0.994706000 |
| 6 | 2.566591000  | -1.596360000 | -1.014311000 |
| 1 | 3.223954000  | 0.420687000  | 1.615470000  |
| 1 | 5.281535000  | -0.962054000 | 1.646549000  |
| 1 | 5.586003000  | -2.754883000 | -0.028259000 |
| 1 | 3.844096000  | -3.154908000 | -1.735049000 |
| 1 | 1.802801000  | -1.753327000 | -1.768484000 |
| 6 | -2.397485000 | -0.597097000 | -0.070944000 |
| 6 | -3.372022000 | -0.370001000 | 0.888060000  |
| 6 | -4.517932000 | -1.143313000 | 0.899660000  |
| 6 | -4.688169000 | -2.148351000 | -0.039638000 |
| 6 | -3.711867000 | -2.374724000 | -0.994798000 |
| 6 | -2.566747000 | -1.596195000 | -1.014442000 |
| 1 | -3.223625000 | 0.420450000  | 1.615774000  |
| 1 | -5.281257000 | -0.962223000 | 1.646962000  |
| 1 | -5.586047000 | -2.754769000 | -0.028141000 |
| 1 | -3.844460000 | -3.154548000 | -1.735256000 |
| 1 | -1.803051000 | -1.753047000 | -1.768733000 |
| 8 | -2.328286000 | 2.061463000  | -0.607850000 |
| 1 | 0.000022000  | -1.478754000 | -0.149818000 |
| 6 | 0.000023000  | -0.769756000 | 1.857524000  |
| 1 | 0.883627000  | -1.343551000 | 2.140397000  |
| 1 | -0.000167000 | 0.168466000  | 2.416068000  |
| 1 | -0.883435000 | -1.343813000 | 2.140315000  |

**IVP<sup>C-H</sup> (TE = -639.594566)**

|   |              |              |              |
|---|--------------|--------------|--------------|
| 6 | -0.759442000 | 1.353558000  | 0.189102000  |
| 6 | -2.231198000 | 0.909383000  | 0.240675000  |
| 6 | -2.297817000 | -0.501704000 | -0.332439000 |
| 6 | -0.954765000 | -1.076909000 | 0.133924000  |
| 7 | -0.049174000 | 0.064675000  | 0.016371000  |
| 1 | -2.880233000 | 1.607993000  | -0.295308000 |
| 1 | -2.574377000 | 0.892496000  | 1.280205000  |
| 6 | 1.316716000  | -0.113694000 | -0.044323000 |
| 6 | 1.868825000  | -1.402436000 | -0.174185000 |
| 6 | 3.232418000  | -1.601828000 | -0.266965000 |



|   |              |              |              |
|---|--------------|--------------|--------------|
| 6 | 4.119881000  | -0.540492000 | -0.227948000 |
| 6 | 3.597326000  | 0.733444000  | -0.090595000 |
| 6 | 2.235540000  | 0.949131000  | 0.001964000  |
| 1 | 1.225345000  | -2.270589000 | -0.206383000 |
| 1 | 3.602564000  | -2.616346000 | -0.369248000 |
| 1 | 5.188312000  | -0.702020000 | -0.297705000 |
| 1 | 4.260582000  | 1.590907000  | -0.051030000 |
| 1 | 1.893337000  | 1.965961000  | 0.111478000  |
| 6 | -2.335572000 | -0.503429000 | -1.857462000 |
| 1 | -2.480662000 | -1.522086000 | -2.228173000 |
| 1 | -3.162708000 | 0.108890000  | -2.227862000 |
| 1 | -1.408657000 | -0.126356000 | -2.292183000 |
| 6 | -3.512184000 | -1.257985000 | 0.173453000  |
| 1 | -4.423694000 | -0.804877000 | -0.226487000 |
| 1 | -3.491623000 | -2.300982000 | -0.156709000 |
| 1 | -3.587660000 | -1.246599000 | 1.262204000  |
| 6 | -0.548583000 | 2.306862000  | -0.985432000 |
| 1 | 0.494615000  | 2.584268000  | -1.128068000 |
| 1 | -0.907702000 | 1.872823000  | -1.918954000 |
| 1 | -1.113742000 | 3.224901000  | -0.804686000 |
| 6 | -0.409983000 | 2.053403000  | 1.500839000  |
| 1 | -1.125606000 | 2.860740000  | 1.678785000  |
| 1 | -0.473256000 | 1.352844000  | 2.336664000  |
| 1 | 0.586936000  | 2.492784000  | 1.505448000  |
| 1 | -0.652627000 | -1.858111000 | -0.574667000 |
| 6 | -0.952700000 | -1.661400000 | 1.537207000  |
| 1 | 0.067032000  | -1.890535000 | 1.851331000  |
| 1 | -1.369473000 | -0.959307000 | 2.263547000  |
| 1 | -1.533262000 | -2.584936000 | 1.586321000  |
